# Supplementary material for: Mapping global prevalence of menopausal symptoms among middle-aged women: a systematic review and meta-analysis
Source: PubMed Central journal article supplement (PMC11220992; doi:10.1186/s12889-024-19280-5), 2024-07-02
Supplement: 12889_2024_19280_MOESM1_ESM.pdf [file 12889_2024_19280_MOESM1_ESM.pdf]

**Supplementary file to**

**Mapping global prevalence of menopausal symptoms among middle-aged women: a systematic review and meta-analysis**

**Supplementary method. Searching strategy for global prevalence of menopausal symptoms.**

| Database searched | Years of coverage | References |
|-------------------|-------------------|------------|
| Embase            | 2000-2023         | 39799      |
| Medline           |                   | 30530      |
| Web of Science    |                   | 26873      |
| Cochrane          |                   | 5061       |
| Total             |                   | 102263     |

**Search strategy—Embase**

|    |                                                                                                                                                                                                                                                                                                                                                                                                                                                                                                                                                                |
|----|----------------------------------------------------------------------------------------------------------------------------------------------------------------------------------------------------------------------------------------------------------------------------------------------------------------------------------------------------------------------------------------------------------------------------------------------------------------------------------------------------------------------------------------------------------------|
| 1  | ('middle aged'/de OR ('middle age' OR 'middle aged'):ab,ti,kw)                                                                                                                                                                                                                                                                                                                                                                                                                                                                                                 |
| 2  | ('premenopause'/de OR ('menopause, pre' OR 'pre menopause' OR 'premenopausal' OR 'premenopause'):ab,ti,kw)                                                                                                                                                                                                                                                                                                                                                                                                                                                     |
| 3  | ('climacterium'/de OR ('climacteric' OR 'menopausal transition' OR 'perimenopausal' OR 'perimenopause' OR 'climacterium'):ab,ti,kw)                                                                                                                                                                                                                                                                                                                                                                                                                            |
| 4  | ('postmenopause '/de OR ('post menopause' OR 'postmenopausal' OR 'postmenopause'):ab,ti,kw)                                                                                                                                                                                                                                                                                                                                                                                                                                                                    |
| 5  | ('female'/de OR ('females' OR 'woman' OR 'women' OR 'female'):ab,ti,kw)                                                                                                                                                                                                                                                                                                                                                                                                                                                                                        |
| 6  | (1 OR 2 OR 3 OR 4)                                                                                                                                                                                                                                                                                                                                                                                                                                                                                                                                             |
| 7  | (5 AND 6)                                                                                                                                                                                                                                                                                                                                                                                                                                                                                                                                                      |
| 8  | ('epidemiological data'/de OR 'epidemiology'/de OR 'geographic distribution'/de OR 'patient volume'/de OR prevalence/exp OR 'incidence'/de OR geography/de OR 'geographic names'/exp OR 'cross-sectional study'/de OR (epidemiolog* OR ((geograph* OR global*) NEAR/3 (distribut*)) OR (patient* NEAR/3 volume*) OR prevalen* OR incidenc* OR population-based* OR cross-sectional*):ab,ti,kw) NOT ((animal/exp OR animal*:de OR nonhuman/de) NOT ('human'/exp)) NOT ('case report'/de OR 'case report*':ti) NOT ([Conference Abstract]/lim) AND [english]/lim |
| 9  | ('menopausal syndrome'/de OR ((menopausal* OR climacterial* OR climacteric* OR climacterium* OR menopause* OR perimenopausal* OR postmenopausal* OR postmenopause*) NEAR/6 (disorder* OR syndrome* OR complaint* OR symptom* OR distress*)):ab,ti,kw)                                                                                                                                                                                                                                                                                                          |
| 10 | ('hot flush'/de OR ('flush, hot' OR 'hot flash' OR 'hot flashes' OR 'hot flushing'):ab,ti,kw)                                                                                                                                                                                                                                                                                                                                                                                                                                                                  |
| 11 | ((('vasomotor symptoms' OR 'vasomotor symptom'):ab,ti,kw)                                                                                                                                                                                                                                                                                                                                                                                                                                                                                                      |
| 12 | (((((sleep* OR sleeping*) NEAR/3 ('disorder' OR 'problem' OR 'disturbance' OR 'disruption')) OR 'sleeplessness' OR 'insomnia' OR 'difficulty sleeping'):ab,ti,kw)                                                                                                                                                                                                                                                                                                                                                                                              |
| 13 | ((('heart discomfort' OR 'palpation' OR 'palpations'):ab,ti,kw)                                                                                                                                                                                                                                                                                                                                                                                                                                                                                                |
| 14 | ('headache'/de OR ('headaches' OR 'migraine'):ab,ti,kw)                                                                                                                                                                                                                                                                                                                                                                                                                                                                                                        |
| 15 | (((((muscle* OR muscular* OR joint* OR osteomuscular* OR shoulder* OR limb*) NEAR/3 (pain OR ache OR discomfort OR aching OR stiff)) OR 'arthralgia' OR 'myalgia' OR 'backache'):ab,ti,kw)                                                                                                                                                                                                                                                                                                                                                                     |

|    |                                                                                                                                                                                                                    |
|----|--------------------------------------------------------------------------------------------------------------------------------------------------------------------------------------------------------------------|
| 16 | (((((physical* OR mental*) NEAR/3 ('exhaustion')) OR 'fatigue' OR tired* OR 'lack of energy'):ab,ti,kw)                                                                                                            |
| 17 | ('depression'/de OR ('depressive disease' OR 'depressive disorder' OR 'depressive episode' OR 'depressive illness' OR 'depressive symptom' OR 'depressive syndrome' OR 'depressive mood' OR 'depressed'):ab,ti,kw) |
| 18 | ('anxiety'/de OR 'anxious':ab,ti,kw)                                                                                                                                                                               |
| 19 | ('irritability'/de OR 'irritable mood':ab,ti,kw)                                                                                                                                                                   |
| 20 | ('mood swings':ab,ti,kw)                                                                                                                                                                                           |
| 21 | ((((reduce* OR loss* OR decrease* OR change*) NEAR/3 ('libido' OR 'libido sexualis' OR 'sex drive' OR 'sexual drive' OR 'sexual libido')):ab,ti,kw)                                                                |
| 22 | ('vaginal dryness'/de OR ('dry vagina' OR 'vaginal dryness'):ab,ti,kw)                                                                                                                                             |
| 23 | ((((bladder* OR urinary*) NEAR/2 (problem* OR symptom*)):ab,ti,kw)                                                                                                                                                 |
| 24 | ((('poor memory' OR 'memory problem' OR 'forgetfulness' OR 'loss of memory'):ab,ti,kw)                                                                                                                             |
| 25 | ((('difficulty concentrating' OR 'difficulty concentration' OR 'lake of concentration' OR 'poor concentration' OR 'decrease concentration'):ab,ti,kw)                                                              |
| 26 | ('formication':ab,ti,kw)                                                                                                                                                                                           |
| 27 | ('change in the appearance, texture, or tone of my skin':ab,ti,kw)                                                                                                                                                 |
| 28 | ('facial hair':ab,ti,kw)                                                                                                                                                                                           |
| 29 | ('drying skin':ab,ti,kw)                                                                                                                                                                                           |
| 30 | (9 OR 10 OR 11 OR 12 OR 13 OR 14 OR 15 OR 16 OR 17 OR 18 OR 19 OR 20 OR 21 OR 22 OR 23 OR 24 OR 25 OR 26 OR 27 OR 28 OR 29)                                                                                        |
| 31 | (7 AND 8 AND 30)                                                                                                                                                                                                   |

### Search strategy—Medline

|    |                                                                                                                                                                                                                                                                                                                                                                                                                                                                                                                                    |
|----|------------------------------------------------------------------------------------------------------------------------------------------------------------------------------------------------------------------------------------------------------------------------------------------------------------------------------------------------------------------------------------------------------------------------------------------------------------------------------------------------------------------------------------|
| S1 | (Epidemiological Monitoring/ OR Epidemiology/ OR Epidemiology.fs. OR exp Incidence/ OR exp Prevalence/ OR Incidence/ OR Geography/ OR exp Geographic Locations/ OR Epidemiologic Studies OR Cross-Sectional Studies/ OR (epidemiolog* OR ((geograph* OR global*) ADJ3 (distribut*)) OR (patient* ADJ3 volume*) OR prevalen* OR incidenc* OR population-based* OR cross-sectional*).ab,ti,kf.) NOT (exp Animals/ NOT Humans/) NOT (news OR congres* OR abstract* OR book* OR chapter* OR dissertation abstract*).pt. AND english.la |
| S2 | (middle aged/ OR ('middle age' OR 'middle aged').ab,ti,kf.)                                                                                                                                                                                                                                                                                                                                                                                                                                                                        |
| S3 | (Premenopause/ OR ('menopause, pre' OR 'pre menopause' OR 'premenopausal' OR 'premenopause').ab,ti,kf.)                                                                                                                                                                                                                                                                                                                                                                                                                            |
| S4 | (Perimenopause/ OR ('climacteric' OR 'menopausal transition' OR 'perimenopausal' OR 'climacterium' OR 'climacterium').ab,ti,kf.)                                                                                                                                                                                                                                                                                                                                                                                                   |
| S5 | (Postmenopause/ OR ('post menopause' OR 'postmenopausal' OR 'postmenopause').ab,ti,kf.)                                                                                                                                                                                                                                                                                                                                                                                                                                            |
| S6 | (S2 OR S3 OR S4 OR S5)                                                                                                                                                                                                                                                                                                                                                                                                                                                                                                             |
| S7 | S6 AND (Female/ OR ('females' OR 'woman' OR 'women' OR 'female').ab,ti,kf.)                                                                                                                                                                                                                                                                                                                                                                                                                                                        |
| S8 | ((((menopausal* OR climacterial* OR climacteric* OR climacterium* OR menopause* OR perimenopausal* OR postmenopausal* OR postmenopause*) ADJ6 (disorder* OR                                                                                                                                                                                                                                                                                                                                                                        |

|     |                                                                                                                                                                                                                 |
|-----|-----------------------------------------------------------------------------------------------------------------------------------------------------------------------------------------------------------------|
|     | syndrome* OR complaint* OR symptom* OR distress*).ab,ti,kf.)                                                                                                                                                    |
| S9  | (Hot Flashes/ OR ('flush, hot' OR 'hot flash' OR 'hot flush' OR 'hot flushing' OR 'vasomotor symptom').ab,ti,kf.)                                                                                               |
| S10 | ((sleep* OR sleeping*) ADJ3 ('disorder' OR 'problem' OR 'disturbance' OR 'disruption')) OR 'sleeplessness' OR 'insomnia' OR 'difficulty sleeping'.ab,ti,kf.)                                                    |
| S11 | ('heart discomfort' OR 'palpation' OR 'palpations'.ab,ti,kf.)                                                                                                                                                   |
| S12 | (Headache/ OR ('headaches' OR 'migraine').ab,ti,kf.)                                                                                                                                                            |
| S13 | ((muscle* OR muscular* OR joint* OR osteomuscular* OR shoulder* OR limb*) ADJ3 (pain OR ache OR discomfort OR aching OR stiff)) OR 'arthralgia' OR 'myalgia' OR 'backache'.ab,ti,kf.)                           |
| S14 | ((physical* OR mental*) ADJ3 ('exhaustion')) OR 'fatigue' OR tired* OR 'lack of energy'.ab,ti,kf.)                                                                                                              |
| S15 | (Depression/ OR ('depressive disease' OR 'depressive disorder' OR 'depressive episode' OR 'depressive illness' OR 'depressive symptom' OR 'depressive syndrome' OR 'depressive mood' OR 'depressed').ab,ti,kf.) |
| S16 | (Anxiety/ OR 'anxious'.ab,ti,kf.)                                                                                                                                                                               |
| S17 | (Irritable Mood/ OR 'irritability'.ab,ti,kf.)                                                                                                                                                                   |
| S18 | ('mood swings'.ab,ti,kf.)                                                                                                                                                                                       |
| S19 | ((reduce* OR loss* OR decrease* OR change*) ADJ3 ('libido').ab,ti,kf.)                                                                                                                                          |
| S20 | ((vaginal dryness' OR 'dry vagina' OR 'vaginal dryness').ab,ti,kf.)                                                                                                                                             |
| S21 | ((bladder* OR urinary*) ADJ2 (problem* OR symptom*).ab,ti,kf.)                                                                                                                                                  |
| S22 | ('poor memory' OR 'memory problem' OR 'forgetfulness' OR 'loss of memory'.ab,ti,kf.)                                                                                                                            |
| S23 | ('difficulty concentrating' OR 'difficulty concentration' OR 'lake of concentration' OR 'poor concentration' OR 'decrease concentration'.ab,ti,kf.)                                                             |
| S24 | ('formication'.ab,ti,kf.)                                                                                                                                                                                       |
| S25 | ('change in the appearance, texture, or tone of my skin'.ab,ti,kf.)                                                                                                                                             |
| S26 | ('facial hair'.ab,ti,kf.)                                                                                                                                                                                       |
| S27 | ('drying skin'.ab,ti,kf.)                                                                                                                                                                                       |
| S28 | (S8 OR S9 OR S10 OR S11 OR S12 OR S13 OR S14 OR S15 OR S16 OR S17 OR S18 OR S19 OR S20 OR S21 OR S22 OR S23 OR S24 OR S25 OR S26 OR S27)                                                                        |
| S29 | (S1 AND S7 AND S28)                                                                                                                                                                                             |

### Search strategy—Web of Science

|   |                                                                                                                                                                                                                                                                                                                                                                                                                                                                                                                                                                                            |
|---|--------------------------------------------------------------------------------------------------------------------------------------------------------------------------------------------------------------------------------------------------------------------------------------------------------------------------------------------------------------------------------------------------------------------------------------------------------------------------------------------------------------------------------------------------------------------------------------------|
| 1 | TS=((epidemiolog* OR ((geograph* OR global*) NEAR/2 (distribut*)) OR (patient* NEAR/2 volume*) OR prevalen* OR incidenc* OR population-based* OR cross-sectional*) NOT ((animal* OR rat OR rats OR mouse OR mice OR murine OR dog OR dogs OR canine OR cat OR cats OR feline OR rabbit OR cow OR cows OR bovine OR rodent* OR sheep OR ovine OR pig OR swine OR porcine OR veterinar* OR chick* OR zebrafish* OR baboon* OR nonhuman* OR primate* OR cattle* OR goose OR geese OR duck OR macaque* OR avian* OR bird* OR fish*) NOT (human* OR patient* OR women OR woman OR men OR man))) |
| 2 | TS=(((('middle aged' OR 'middle age') OR ('premenopause' OR 'menopause, pre' OR 'pre menopause' OR 'premenopausal') OR ('climacterium' OR 'climacteric' OR                                                                                                                                                                                                                                                                                                                                                                                                                                 |

|   |                                                                                                                                                                                                                                                                                                                                                                                                                                                                                       |
|---|---------------------------------------------------------------------------------------------------------------------------------------------------------------------------------------------------------------------------------------------------------------------------------------------------------------------------------------------------------------------------------------------------------------------------------------------------------------------------------------|
|   | 'menopausal transition' OR 'perimenopausal' OR 'perimenopause') OR ('postmenopause' OR 'post menopause' OR 'postmenopausal')) AND ('female' OR 'females' OR 'woman' OR 'women'))                                                                                                                                                                                                                                                                                                      |
| 3 | TS=((menopausal* OR climacterial* OR climacteric* OR climacterium* OR menopause* OR perimenopausal* OR postmenopausal* OR postmenopause*) NEAR/2 (disorder* OR syndrome* OR complaint* OR symptom* OR distress*))                                                                                                                                                                                                                                                                     |
| 4 | TS= (('hot flush' OR 'hot flash' OR 'hot flushing' OR 'vasomotor symptom') OR (((sleep* OR sleeping*) NEAR/2 ('disorder' OR 'problem' OR 'disturbance' OR 'disruption')) OR 'sleeplessness' OR 'insomnia' OR 'difficulty sleeping') OR ('heart discomfort' OR palpation) OR (headache OR migraine) OR (((muscle* OR muscular* OR joint* OR osteomuscular* OR shoulder* OR limb*) NEAR/2 (pain OR ache OR discomfort OR aching OR stiff)) OR 'arthralgia' OR 'myalgia' OR 'backache')) |
| 5 | TS=(((physical* OR mental*) NEAR/3 ('exhaustion')) OR 'fatigue' OR tired* OR 'lack of energy') OR ('depression' OR 'depressive disease' OR 'depressive disorder' OR 'depressive episode' OR 'depressive illness' OR 'depressive symptom' OR 'depressive syndrome' OR 'depressive mood' OR 'depressed') OR ('anxiety' OR 'anxious') OR ('irritability' OR 'irritable mood') OR ('mood swings'))                                                                                        |
| 6 | TS=(((reduce* OR loss* OR decrease* OR change*) NEAR/3 ('libido')) OR ((bladder* OR urinary*) NEAR/2 (problem* OR symptom*)) OR ('vaginal dryness' OR 'dry vagina' OR 'vaginal dryness'))                                                                                                                                                                                                                                                                                             |
| 7 | TS= (('poor memory' OR 'memory problem' OR 'forgetfulness' OR 'loss of memory') OR ('difficulty concentrating' OR 'difficulty concentration' OR 'lake of concentration' OR 'poor concentration' OR 'decrease concentration') OR formication OR ('drying skin') OR ('change in the appearance, texture, or tone of my skin') OR ('facial hair'))                                                                                                                                       |
| 8 | #3 OR #4 OR #5 OR #6 OR #7                                                                                                                                                                                                                                                                                                                                                                                                                                                            |
| 9 | #1 AND #2 AND #8                                                                                                                                                                                                                                                                                                                                                                                                                                                                      |

### Search strategy—Cochrane

|   |                                                                                                                                                                                                                                                                                                                                                                                                                  |
|---|------------------------------------------------------------------------------------------------------------------------------------------------------------------------------------------------------------------------------------------------------------------------------------------------------------------------------------------------------------------------------------------------------------------|
| 1 | ((epidemiolog* OR ((geograph* OR global*) NEAR/3 (distribut*)) OR (patient* NEAR/3 volume*) OR prevalen* OR incidenc* OR (population NEXT/1 based*) OR (cross NEXT/1 sectional*)):ab,ti,kw)                                                                                                                                                                                                                      |
| 2 | ((('middle aged' OR 'middle age') OR ('premenopause' OR 'menopause, pre' OR 'pre menopause' OR 'premenopausal') OR ('climacterium' OR 'climacteric' OR 'menopausal transition' OR 'perimenopausal' OR 'perimenopause') OR ('postmenopause' OR 'post menopause' OR 'postmenopausal')) AND ('female' OR 'females' OR 'woman' OR 'women')):ab,ti,kw)                                                                |
| 3 | ((menopausal* OR climacterial* OR climacteric* OR climacterium* OR menopause* OR perimenopausal* OR postmenopausal* OR postmenopause*) NEAR/4 (disorder* OR syndrome* OR complaint* OR symptom* OR distress*)):ab,ti,kw)                                                                                                                                                                                         |
| 4 | ((('hot flush' OR 'flush, hot' OR 'hot flash' OR 'hot flashes' OR 'hot flushing') OR ('vasomotor symptoms' OR 'vasomotor symptom') OR (((sleep* OR sleeping*) NEAR/3 ('disorder' OR 'problem' OR 'disturbance' OR 'disruption')) OR 'sleeplessness' OR 'insomnia' OR 'difficulty sleeping') OR ('heart discomfort' OR 'palpation' OR 'palpations') OR ('headache' OR 'headaches' OR 'migraine') OR (((muscle* OR |

|   |                                                                                                                                                                                                                                                                                                                                                                                                          |
|---|----------------------------------------------------------------------------------------------------------------------------------------------------------------------------------------------------------------------------------------------------------------------------------------------------------------------------------------------------------------------------------------------------------|
|   | muscular* OR joint* OR osteomuscular* OR shoulder* OR limb*) NEAR/2 (pain OR ache OR discomfort OR aching OR stiff)) OR 'arthralgia' OR 'myalgia' OR 'backache')):ab,ti,kw)                                                                                                                                                                                                                              |
| 5 | (((((physical* OR mental*) NEAR/3 ('exhaustion')) OR 'fatigue' OR tired* OR 'lack of energy') OR ('depression' OR 'depressive disease' OR 'depressive disorder' OR 'depressive episode' OR 'depressive illness' OR 'depressive symptom' OR 'depressive syndrome' OR 'depressive mood' OR 'depressed') OR ('anxiety' OR 'anxious') OR ('irritability' OR 'irritable mood') OR ('mood swings'))):ab,ti,kw) |
| 6 | (((((reduce* OR loss* OR decrease* OR change*) NEAR/3 ('libido')) OR ((bladder* OR urinary*) NEAR/2 (problem* OR symptom*)) OR ('vaginal dryness' OR 'dry vagina' OR 'vaginal dryness'))):ab,ti,kw)                                                                                                                                                                                                      |
| 7 | ((('poor memory' OR 'memory problem' OR 'forgetfulness' OR 'loss of memory') OR ('difficulty concentrating' OR 'difficulty concentration' OR 'lake of concentration' OR 'poor concentration' OR 'decrease concentration') OR('formication') OR ('drying skin') OR ('change in the appearance, texture, or tone of my skin') OR ('facial hair'))):ab,ti,kw)                                               |
| 8 | #3 OR #4 OR #5 OR #6 OR #7                                                                                                                                                                                                                                                                                                                                                                               |
| 9 | #1 AND #2 AND #8                                                                                                                                                                                                                                                                                                                                                                                         |

R code

```
install.packages(c("metafor", "meta"))
library(metafor)
library(meta)
dat <- read.csv("data.csv", header = T, sep = ",")
ies <- escalc(xi = cases, ni = total, data = dat, measure = "PFT")
pes.da <- rma(yi, vi, data = ies, method="REML")
pes <- predict(pes.da, transf = transf.ipft.hm, targ = list(ni = dat$total))
print(pes)
print(pes.da, digits = 4)
confint(pes.da, digits = 2)
pes.summary <- metaprop(cases, total, authoryear, data = dat, sm = "PFT")
forest(pes.summary)
metarate <- metaprop(cases, total, author, data=dat, sm="PFT", incr=0.5, allincr=TRUE,
addincr=FALSE, title="", byvar=country, print.byvar=TRUE)
forest(metarate)
```

**Supplementary Table 1. Characteristics for including studies.**

| Author               | Country  | P. year | Study year | Quality | Diagnosis criteria     | Sample Source   | Study design    |
|----------------------|----------|---------|------------|---------|------------------------|-----------------|-----------------|
| Lan, et al           | China    | 2017    | 2014       | 8       | KMI                    | Community       | cross-sectional |
| Adhikari, et al      | Nepal    | 2022    | 2017       | 8       | MRS                    | Community       | cross-sectional |
| Wang, et al          | China    | 2021    | 2018       | 7       | KMI                    | Community       | cross-sectional |
| Yang, et al          | China    | 2017    | 2016-2017  | 8       | KMI                    | Health check-up | Cohort          |
| Olaolorun, et al     | Nigeria  | 2009    |            | 7       | MRS                    | Community       | cross-sectional |
| Chedraui, et al      | Ecuador  | 2010    | 2009       | 8       | MRS                    | Community       | cross-sectional |
| Li, et al            | China    | 2012    | 2010-2011  | 7       | KMI                    | Community       | cross-sectional |
| Zagalaz-Anula, et al | Spain    | 2019    | 2016-2017  | 8       | MRS                    | Health check-up | cross-sectional |
| Javadivala, et al    | Iran     | 2020    | 2017       | 7       | MRS                    | Health check-up | Cohort          |
| Nagaraj, et al       | India    | 2021    | 2019       | 7       | MRS                    | Health check-up | cross-sectional |
| Yisma, et al         | Ethiopia | 2017    | 2015       | 8       | MRS                    | Community       | cross-sectional |
| Korkmaz, et al       | Turkey   | 2022    |            | 8       | MRS                    | Health check-up | Cohort          |
| AlQuaiz, et al       | Saudi    | 2013    | 2010       | 8       | MRS                    | Health check-up | cross-sectional |
| Yu, et al            | China    | 2022    |            | 8       | Others                 | Community       | cross-sectional |
|                      | Korea    |         |            | 8       | Others                 |                 |                 |
|                      | Taiwan   |         |            | 8       | Others                 |                 |                 |
| Genazzani, et al     | UK       | 2006    | 2004-2005  | 8       | Face-to-face interview | Community       | cross-sectional |
|                      | France   |         |            | 8       | Face-to-face interview |                 |                 |
|                      | Germany  |         |            | 8       | Face-to-face interview |                 |                 |
|                      | Belgium  |         |            | 8       | Face-to-face           |                 |                 |

|                    |                                                                                                                                               |      |           |   |                              |                  |                 |
|--------------------|-----------------------------------------------------------------------------------------------------------------------------------------------|------|-----------|---|------------------------------|------------------|-----------------|
|                    |                                                                                                                                               |      |           |   | interview                    |                  |                 |
|                    | Netherlands                                                                                                                                   |      |           | 8 | Face-to-face interview       |                  |                 |
|                    | Switzerland                                                                                                                                   |      |           | 8 | Face-to-face interview       |                  |                 |
|                    | Spain                                                                                                                                         |      |           | 8 | Face-to-face interview       |                  |                 |
| Aaron, et al       | India                                                                                                                                         | 2002 |           | 8 | SDQ-9 for depression         | Community        | cross-sectional |
| Abdel-Salam, et al | Saudi                                                                                                                                         | 2021 | 2020      | 8 | MRS                          | Health check-up  | cross-sectional |
| Anderson, et al    | Australia                                                                                                                                     | 2004 | 1999      | 6 | the Greene Climacteric Scale | electoral roles  | cross-sectional |
|                    | Japan                                                                                                                                         |      | 1998      | 6 | Others                       |                  |                 |
| Shafie, et al      | Oman                                                                                                                                          | 2011 | 2010      | 8 | MRS                          | Health check-up  | cross-sectional |
| Aloufi, et al      | Saudi                                                                                                                                         | 2022 | 2022      | 8 | MRS                          | Health check-up  | cross-sectional |
| Blümel, et al      | 12 Latin American countries: Argentina, Bolivia, Chile, Colombia, Cuba, Dominican Republic, Ecuador, Mexico, Panama, Peru, Uruguay, Venezuela | 2012 | 2006-2007 | 8 | MRS                          | Health check-ups | cross-sectional |
| Chou, et al        | Macau, China                                                                                                                                  | 2014 | 2011      | 8 | MRS                          | Health check-up  | cross-sectional |
| Fallahzadeh, et al | Iran                                                                                                                                          | 2007 | 2006      | 8 | Face-to-face                 | Community        | cross-sectional |



|                     |           |      |           |   |                                      |                       |                 |
|---------------------|-----------|------|-----------|---|--------------------------------------|-----------------------|-----------------|
|                     |           |      |           |   | interview                            |                       |                 |
| Fuh, et al          | Taiwan    | 2003 | 1998      | 8 | KMI                                  | Community             | cross-sectional |
| Chedraui, et al     | Ecuador   | 2014 | 2011-2012 | 8 | MRS                                  | newspaper advertising | cross-sectional |
| Chedraui, et al     | Ecuador   | 2010 | 2007      | 8 | MRS                                  | Health check-up       | cross-sectional |
| Ojeda, et al        | Peru      | 2014 |           | 8 | MRS                                  | Health check-up       | cross-sectional |
| Ikeda, et al        | Japan     | 2005 | 2001-2004 | 8 | The Keio questionnaire               | Health check-up       | cross-sectional |
| Ishizuka, et al     | Japan     | 2008 | 1998      | 8 | the simplified menopause index (SMI) | Community             | cross-sectional |
| Kapur, et al        | India     | 2009 |           | 8 | the Greene Climacteric Scale         | Community             | Cohort          |
| Sharma, et al       | Nepal     | 2021 | 2019      | 8 | MRS                                  | Community             | cross-sectional |
| Qazi, et al         | Pakistan  | 2006 |           | 8 | Others                               | Community             | cross-sectional |
| Rahman, et al       | Malaysia  | 2010 | 2007      | 8 | MRS                                  | Health check-up       | cross-sectional |
| Shea, et al         | China     | 2006 |           | 8 | Face-to-face interview               | community             | cross-sectional |
| Som, et al          | India     | 2012 |           | 8 | MENQOL                               | Community             | cross-sectional |
| Alwi, et al         | Malaysia  | 2009 | 2007-2008 | 8 | MENQOL                               | Community             | cross-sectional |
| Waidyasekera, et al | Sri Lanka | 2009 |           | 8 | MRS                                  | Community             | cross-sectional |
| Tomida, et al       | Japan     | 2021 |           | 8 | KMI                                  | Community             | cross-sectional |
| He, et al           | Australia | 2021 | 2018-2019 | 8 | MRS                                  | Health check-up       | Cohort          |
| Kumari, et al       | India     | 2020 | 2016-2017 | 8 | MRS                                  | Community             | cross-sectional |
| Malacara, et al     | Mexico    | 2002 |           | 8 | Face-to-face interview               | Community             | cross-sectional |

|                     |             |      |           |   |                                                                                                                    |                  |                 |
|---------------------|-------------|------|-----------|---|--------------------------------------------------------------------------------------------------------------------|------------------|-----------------|
| Silva, et al        | Brazil      | 2013 |           | 7 | MRS                                                                                                                | Health check-up  | cross-sectional |
| Shringarpure, et al | India       | 2022 |           | 8 | MRS                                                                                                                | Health check-up  | cross-sectional |
| Martínez, et al     | Spain       | 2013 | 2006      | 8 | KMI                                                                                                                | Community        | cross-sectional |
| Andac, et al        | Turkey      | 2017 | 2015      | 7 | Menopause Rating Scale (MRS), Female Sexual Function Index (FSFI), and Sexual Satisfaction Scale for Women (SSS-W) | Community        | cross-sectional |
| Yang, et al         | China       | 2008 | 2003-2004 | 8 | Face-to-face interview                                                                                             | Community        | cross-sectional |
| Yim, et al          | Korea       | 2015 | 2012-2013 | 7 | MENQOL                                                                                                             | Health check-up  | cross-sectional |
| Yokota, et al       | Japan       | 2016 | 1993-2014 | 8 | The Keio questionnaire                                                                                             | Health check-up  | Cohort          |
| Gast, et al         | Netherlands | 2008 | 1994-1995 | 7 | Others                                                                                                             | population-based | cross-sectional |
| Du, et al           | China       | 2020 |           | 8 | KMI                                                                                                                | Community        | cross-sectional |
| Buhling, et al      | Germany     | 2014 | 2012      | 7 | MRS                                                                                                                | Community        | cross-sectional |
| Singh, et al        | India       | 2014 | 2011-2013 | 8 | MRS                                                                                                                | population-based | cross-sectional |
| Kulkarni, et al     | India       | 2016 | 2015      | 7 | MRS                                                                                                                | community        | cross-sectional |
| Borker, et al       | India       | 2013 | 2009      | 8 | Face-to-face interview                                                                                             | community        | cross-sectional |
| Rathnayake, et al   | Sri Lanka   | 2019 | 2015-2017 | 7 | MRS                                                                                                                | community        | cross-sectional |
| Kwon, et al         | Korea       | 2016 | 2010-2012 | 8 | MRS                                                                                                                | Health check-up  | cross-sectional |
| Baquedano, et al    | Spain       | 2023 | 2021      | 8 | Others                                                                                                             | population-based | cross-sectional |
| Brzyski, et al      | USA         | 2001 |           | 8 | MENQOL                                                                                                             | Health check-up  | cross-sectional |

|                   |           |      |           |   |                                                                                      |                  |                 |
|-------------------|-----------|------|-----------|---|--------------------------------------------------------------------------------------|------------------|-----------------|
| Hwang, et al      | Korea     | 2021 | 2016      | 7 | PSQI, PHQ-9                                                                          | population-based | cross-sectional |
| Ahmadih, et al    | Lebanon   | 2021 | 2016-2017 | 8 | Face-to-face interview                                                               | population-based | cross-sectional |
| Namgoung, et al   | Korea     | 2022 | 2014-2018 | 6 | MENQOL                                                                               | Health check-up  | cross-sectional |
| Pateliya, et al   | India     | 2022 | 2022      | 9 | Others                                                                               |                  | cross-sectional |
| Srinivasan, et al | India     | 2021 | 2020      | 9 | MRS                                                                                  | Health check-up  | cross-sectional |
| Chim, et al       | Singapore | 2002 | 2000      | 8 | Face-to-face interview, CES-D8 for depression                                        | community        | cross-sectional |
| Dhillon,et al     | Malaysia  | 2006 | 2002-2003 | 8 | Others                                                                               | population-based | cross-sectional |
| Li, et al         | China     | 2008 | 2004      | 8 | The Zung Self-rating Depression Scale (SDS),The Zung Self-rating Anxiety Scale (SAS) | community        | cross-sectional |
| Santoro, et al    | USA       | 2009 | 2008      | 6 | Others                                                                               | population-based | cross-sectional |
| Chuni, et al      | Nepal     | 2011 | 2008      | 8 | MRS                                                                                  | Health check-up  | cross-sectional |
| Valadares, et al  | Brazil    | 2011 | 2005      | 7 | Short Personal Experiences Questionnaire (SPEQ)                                      | population-based | cross-sectional |
| Nisar, et al      | Pakistan  | 2015 | 2007-2008 | 8 | MRS                                                                                  | community        | cross-sectional |
| Zhang, et al      | China     | 2016 | 2014      | 8 | MRS                                                                                  | community        | cross-sectional |
| Agaba, et al      | Nigeria   | 2017 |           | 7 | MRS                                                                                  | Health check-up  | Cohort          |
| AlQuaiz, et al    | Saudi     | 2017 | 2016      | 8 | MRS                                                                                  | Health check-up  | cross-sectional |
| Grigoriou, et al  | Greek     | 2013 |           | 7 | the Greene                                                                           | Health check-up  | cross-sectional |

|                    |                       |      |           |   |                        |                                           |                 |
|--------------------|-----------------------|------|-----------|---|------------------------|-------------------------------------------|-----------------|
|                    |                       |      |           |   | Climacteric Scale      |                                           |                 |
| Hunter, et al      | UK                    | 2012 | 2001-2005 | 8 | Hot Flush Rating Scale | community                                 | cross-sectional |
| Haines, et al      | China                 | 2005 |           | 8 | Others                 | community                                 | Cohort          |
|                    | the Philippines       |      |           | 8 | Others                 |                                           |                 |
|                    | Republic of Indonesia |      |           | 8 | Others                 |                                           |                 |
|                    | Korea                 |      |           | 8 | Others                 |                                           |                 |
|                    | Malaysia              |      |           | 8 | Others                 |                                           |                 |
|                    | Pakistan              |      |           | 8 | Others                 |                                           |                 |
|                    | Taiwan                |      |           | 8 | Others                 |                                           |                 |
|                    | Thailand              |      |           | 8 | Others                 |                                           |                 |
|                    | Vietnam               |      |           | 8 | Others                 |                                           |                 |
| Melby, et al       | Japan                 | 2005 | 2005      | 6 | Others                 | community                                 | cross-sectional |
| Dennerstein, et al | Australia             | 2000 |           | 6 | Face-to-face interview | population-based                          | Cohort          |
| Nappi, et al       | UK                    | 2008 | 2008      | 8 | Face-to-face interview | computer-assisted telephone interviewing. | cross-sectional |
|                    | France                |      |           | 8 | Face-to-face interview |                                           |                 |
|                    | Germany               |      |           | 8 | Face-to-face interview |                                           |                 |
|                    | Italy                 |      |           | 8 | Face-to-face interview |                                           |                 |
|                    | Netherlands           |      |           | 8 | Face-to-face interview |                                           |                 |

|                   |             |      |           |   |                        |                  |                 |
|-------------------|-------------|------|-----------|---|------------------------|------------------|-----------------|
|                   | Switzerland |      |           | 8 | Face-to-face interview |                  |                 |
| Gotmar, et al     | Sweden      | 2008 | 1995-2000 | 8 | Others                 | population-based | cross-sectional |
| Górecka, et al    | Poland      | 2022 | 2018-2019 | 8 | Others                 | community        | cross-sectional |
| Saied, et al      | Iraq        | 2021 | 2020      | 8 | MRS                    | Health check-up  | cross-sectional |
| Sheereen, et al   | India       | 2022 | 2021      | 8 | MENQOL                 | Community        | cross-sectional |
| Kang, et al       | India       | 2021 | 2019      | 8 | MENQOL                 | community        | cross-sectional |
| Senthilvel, et al | India       | 2018 | 2018      | 8 | MENQOL                 | Health check-up  | cross-sectional |
| Karmakar, et al   | India       | 2017 | 2014      | 8 | MENQOL                 | community        | cross-sectional |
| Ganapathy, et al  | India       | 2018 | 2016      | 8 | MENQOL                 | Health check-up  | cross-sectional |
| Sripraser, et al  | Thailand    | 2017 | 2015      | 8 | Hot Flush Rating Scale | population-based | cross-sectional |
| Tan, et al        | Turkey      | 2014 | 2009      | 8 | MRS                    | Health check-up  | cross-sectional |
| Chopra, et al     | India       | 2022 | 2021      | 8 | MRS                    | community        | cross-sectional |
| Vaccaro, et al    | Italy       | 2021 |           | 8 | Face-to-face interview | community        | cross-sectional |
| Hachul, et al     | Brazil      | 2021 | 2007      | 8 | Others                 | community        | cross-sectional |
| Saú, et al        | Brazil      | 2020 | 2014      | 8 | KMI                    | community        | cross-sectional |
| Smith, et al      | USA         | 2015 | 2006-2015 | 8 | Others                 | community        | Cohort          |
| Zhao, et al       | China       | 2023 | 2017-2019 | 8 | MRS                    | community        | cross-sectional |
| Han, et al        | China       | 2023 | 2012-2013 | 8 | KMI                    | community        | cross-sectional |
| Ryu, et al        | Korea       | 2022 | 2013-2016 | 8 | MRS                    | Health check-up  | cross-sectional |
| Salin, et al      | Finland     | 2022 | 2012      | 8 | Others                 | population-based | cross-sectional |
| Thakur, et al     | India       | 2022 |           | 8 | Others                 | community        | cross-sectional |
| Tijerina, et al   | Mexico      | 2022 | 2015-2017 | 8 | Others                 | telephone        | cross-sectional |

|                    |         |      |           |   |                                                                                                                                                                                                |                          |                 |
|--------------------|---------|------|-----------|---|------------------------------------------------------------------------------------------------------------------------------------------------------------------------------------------------|--------------------------|-----------------|
| Koçoğlu, et al     | Turkey  | 2022 | 2018-2019 | 8 | MRS                                                                                                                                                                                            | Health check-up          | cross-sectional |
| Arakane, et al     | Ecuador | 2011 | 2010      | 8 | MRS                                                                                                                                                                                            | Health check-up          | cross-sectional |
| AlDughaiter, et al | Saudi   | 2015 | 2010      | 8 | MRS                                                                                                                                                                                            | Health check-up          | cross-sectional |
| Ceylan, et al      | Turkey  | 2014 | 2009      | 8 | MENQOL                                                                                                                                                                                         | Community                | cross-sectional |
| Thakur,et al       | India   | 2019 |           | 8 | the Greene Climacteric Scale                                                                                                                                                                   | Community                | cross-sectional |
| Gallicchio, et al  | USA     | 2005 | 2000-2004 | 8 | Others                                                                                                                                                                                         | population-based         | cross-sectional |
| Kim, et al         | Korea   | 2017 | 2015      | 8 | Others                                                                                                                                                                                         | population-based         | cross-sectional |
| Sievert, et al     | USA     | 2022 | 2020-2021 | 8 | Face-to-face interview, PHQ-9 for depression                                                                                                                                                   | community                | cross-sectional |
| Gerber, et al      | USA     | 2018 | 1999-2003 | 8 | Face-to-face interview                                                                                                                                                                         | fliers and word of mouth | cross-sectional |
| Silvestrin, et al  | USA     | 2016 | 2014      | 7 | WHAT Questionnaire(patient health questionnaire-9 (PHQ-9), the generalized anxiety disorder-2 (GAD-2) scale, 3 incontinence questions (3IQ), as well as a few questions from the female sexual | community                | cross-sectional |

|                       |            |      |           |   | function index-6 item (FSFI-6))      |                                                      |                 |
|-----------------------|------------|------|-----------|---|--------------------------------------|------------------------------------------------------|-----------------|
| Ghazanfarpour, et al  | Iran       | 2016 |           | 8 | MENQOL                               | Health check-up                                      | cross-sectional |
| Duffy, et al          | UK         | 2012 | 2009      | 8 | Others                               | community                                            | cross-sectional |
| Loutfy, et al         | Egypt      | 2006 | 2002      | 8 | Face-to-face interview               | community                                            | cross-sectional |
| Delavar, et al        | Iran       | 2011 |           | 8 | Face-to-face interview               | community                                            | cross-sectional |
| Chedraui, et al       | Ecuador    | 2007 | 2005      | 6 | MENQOL                               | screening program was advertised through a newspaper | cross-sectional |
| Chedraui, et al       | Ecuador    | 2012 | 2010-2011 | 6 | MRS                                  | community                                            | cross-sectional |
| Chedraui, et al       | Ecuador    | 2014 | 2013      | 6 | CS-10                                | community                                            | cross-sectional |
| Suka, et al           | Japan      | 2010 | 2008      | 8 | the simplified menopause index (SMI) | population-based                                     | cross-sectional |
| Rahman, et al         | Bangladesh | 2011 | 2010      | 8 | MRS                                  | Health check-up                                      | cross-sectional |
| Singh, et al          | India      | 2012 |           | 8 | MRS                                  | Health check-up                                      | cross-sectional |
| Aguilar-Zavala, et al | Mexico     | 2012 |           | 8 | Face-to-face interview               | population-based                                     | cross-sectional |
| Agwu, et al           | Nigeria    | 2008 |           | 8 | Others                               | population-based                                     | cross-sectional |
| Ahmed, et al          | Bangladesh | 2016 | 2013-2014 | 8 | MENQOL                               | population-based                                     | cross-sectional |
| Gartoulla, et al      | Australia  | 2016 | 2013-2014 | 8 | MENQOL                               | population-based                                     | cross-sectional |
| Berecki-Gisolf, et al | Australia  | 2009 | 1996      | 8 | Face-to-face interview, 36-item      | population-based                                     | Cohort          |

|                      |                      |      |           |   |                                               |                  |                 |
|----------------------|----------------------|------|-----------|---|-----------------------------------------------|------------------|-----------------|
|                      |                      |      |           |   | Short-Form Health Survey subscale             |                  |                 |
| Bener, et al         | Qatar                | 2014 | 2012-2013 | 8 | MENQOL                                        | Health check-up  | cross-sectional |
| Bener, et al         | United Arab Emirates | 2000 | 1999      | 8 | MENQOL                                        | Health check-up  | cross-sectional |
| Im, et al            | USA                  | 2010 |           | 8 | the Midlife Women's Symptom Index             | Internet survey  | cross-sectional |
| Williams, et al      | USA                  | 2008 |           | 8 | MENQOL                                        | population-based | cross-sectional |
| Ande, et al          | Nigeria              | 2011 | 2008      | 8 | Face-to-face interview                        | Health check-up  | cross-sectional |
| Andenæs, et al       | Norway               | 2020 | 2006-2008 | 8 | Face-to-face interview and the Insomnia Index | population-based | cross-sectional |
| Khatoon, et al       | Pakistan             | 2018 |           | 8 | MRS                                           | Health check-up  | cross-sectional |
| Budakoğlu, et al     | Turkey               | 2007 | 2005      | 8 | MRS                                           | community        | cross-sectional |
| Sharanya Shre, et al | India                | 2016 | 2013      | 8 | MRS                                           | Health check-up  | cross-sectional |
| Damodaran, et al     | Malaysia             | 2000 | 1996-1997 | 8 | Others                                        | Health check-up  | cross-sectional |
| Zelege, et al        | Australia            | 2016 |           | 8 | MENQOL                                        | population-based | cross-sectional |
| Masoudi, et al       | Iran                 | 2021 | 2018-2019 | 8 | MRS, Insomnia Severity Index (ISI)            | Health check-up  | cross-sectional |
| Beura, et al         | India                | 2020 | 2019      | 8 | MRS                                           | population-based | cross-sectional |
| Thapa, et al         | Cambodia             | 2020 | 2017      | 8 | MRS                                           | community        | cross-sectional |
| Ibrahim, et al       | Egypt                | 2015 | 2009-2013 | 8 | MRS                                           | Health check-up  | cross-sectional |
| Nusrat, et al        | Pakistan             | 2008 | 2005-2006 | 8 | Face-to-face                                  | Health check-up  | cross-sectional |



|                  |                                           |      |           |   |                              |                  |                 |
|------------------|-------------------------------------------|------|-----------|---|------------------------------|------------------|-----------------|
|                  |                                           |      |           |   | interview                    |                  |                 |
| Bhavani, et al   | India                                     | 2022 | 2018-2019 | 8 | Face-to-face interview       | community        | cross-sectional |
| Liu, et al       | Australia                                 | 2007 |           | 8 | MENQOL                       | community        | cross-sectional |
| Fooladi, et al   | Iran                                      | 2018 | 2016-2017 | 7 | MENQOL                       | community        | cross-sectional |
| Lee, et al       | Taiwan                                    | 2020 | 2006-2016 | 8 | Others                       | Health check-up  | cross-sectional |
| Modoodi, et al   | Iran                                      | 2020 | 2014      | 7 | Others                       | Health check-up  | cross-sectional |
| Kalhan, et al    | India                                     | 2020 | 2018-2019 | 8 | MRS                          | community        | cross-sectional |
| Rindner, et al   | Sweden                                    | 2017 | 2009-2010 | 7 | MRS                          | Health check-up  | cross-sectional |
| Al-Musa, et al   | Saudi                                     | 2017 | 2016      | 8 | MRS                          | Health check-up  | cross-sectional |
| Moilanen, et al  | Finland                                   | 2010 | 2000-2001 | 8 | Face-to-face interview       | population-based | cross-sectional |
| Bairy, et al     | India                                     | 2009 | 2006      | 8 | MENQOL                       | Health check-up  | cross-sectional |
| Heinemann, et al | Europe(France, Germany, Spain, Sweden)    | 2008 |           | 8 | MRS                          | population-based | cross-sectional |
|                  | USA                                       |      |           | 8 | MRS                          |                  |                 |
|                  | Latin America(Argentina , Brazil, Mexico) |      |           | 8 | MRS                          |                  |                 |
|                  | Republic of Indonesia                     |      |           | 8 | MRS                          |                  |                 |
| Uncu, et al      | Turkey                                    | 2007 | 2004-2005 | 6 | Others                       | population-based | cross-sectional |
| Lawton, et al    | New Zealand                               | 2008 | 1999-2004 | 6 | the Greene Climacteric Scale | Health check-up  | cross-sectional |
| Liu, et al       | Australia                                 | 2008 |           | 8 | MENQOL                       | Community        | cross-sectional |

|                  |                                                                     |      |           |   |                                                |                  |                 |
|------------------|---------------------------------------------------------------------|------|-----------|---|------------------------------------------------|------------------|-----------------|
| Liu, et al       | Australia                                                           | 2007 | 2005      | 8 | MENQOL                                         | Community        | cross-sectional |
| Saccomani, et al | Brazil                                                              | 2017 | 2012-2013 | 8 | MRS                                            | population-based | cross-sectional |
| Im, et al        | USA                                                                 | 2009 |           | 8 | the Midlife Women's Symptom Index              | Community        | cross-sectional |
| Resmi, et al     | India                                                               | 2020 | 2015      | 8 | Face-to-face interview                         | community        | cross-sectional |
| Ashrafi, et al   | Iran                                                                | 2009 | 2004-2005 | 8 | Others                                         | population-based | cross-sectional |
| Ayranci, et al   | Turkey                                                              | 2010 | 2008      | 8 | the Greene Climacteric Scale                   | population-based | cross-sectional |
| Deveci, et al    | Turkey                                                              | 2010 | 2006      | 7 | the Beck Depression Inventory (BDI)            | population-based | cross-sectional |
| Sagdeo, et al    | India                                                               | 2011 | 2007-2009 | 9 | Others                                         | community        | cross-sectional |
| Oğurlu, et al    | Turkey                                                              | 2011 | 2007-2008 | 9 | The Climacteric Complaint Tool                 | Health check-up  | cross-sectional |
| Wang, et al      | China                                                               | 2021 | 2018      | 8 | PHQ-9, GAD-7                                   | Community        | cross-sectional |
| Anolue, et al    | Nigeria                                                             | 2012 | 2009      | 6 | Others                                         | community        | cross-sectional |
| Mahajan,et al    | India                                                               | 2012 | 2007-2008 | 8 | twenty eight item General Health Questionnaire | community        | cross-sectional |
| Mustafa, et al   | Iraq                                                                | 2012 | 2010-2011 | 8 | Others                                         | Health check-up  | cross-sectional |
| Nappi, et al     | Great Britain, the United States, Canada, Sweden, Denmark, Finland, | 2012 | 2010      | 8 | Others                                         | email            | cross-sectional |

|                    |              |      |           |   |                              |                     |                 |
|--------------------|--------------|------|-----------|---|------------------------------|---------------------|-----------------|
|                    | and Norway   |      |           |   |                              |                     |                 |
| Sassoon, et al     | South Africa | 2014 |           | 7 | the Greene Climacteric Scale | telephone screening | cross-sectional |
| Liu, et al         | China        | 2013 | 2008      | 8 | KMI                          | community           | cross-sectional |
| Mohamed, et al     | Saudi        | 2014 |           | 9 | MENQOL                       | Health check-up     | cross-sectional |
| Hashemzadeh, et al | Iran         | 2019 | 2017-2018 | 9 | Saba questionnaire           | Health check-up     | cross-sectional |
| Hestiantoro, et al | Indonesian   | 2019 | 2016      | 8 | Face-to-face interview       |                     | cross-sectional |
| Kong, et al        | China        | 2019 |           | 8 | MRS                          | Health check-up     | cross-sectional |
| Sharifi, et al     | Iran         | 2019 | 2013-2014 | 8 | MRS                          | community           | cross-sectional |
| Taavoni, et al     | Iran         | 2015 | 2010-2012 | 8 | PSQI                         | community           | cross-sectional |
| Holm, et al        | USA          | 2000 | 1999      | 8 | WHAS                         | community           | cross-sectional |
| Pan, et al         | Taiwan       | 2002 |           | 8 | Others                       | population-based    | cross-sectional |
| Kasuga, et al      | Japan        | 2004 | 1993-1999 | 8 | The Keio questionnaire       | menopause clinic    | cross-sectional |
| Kaur, et al        | India        | 2004 | 1998-2000 | 8 | Face-to-face interview       | community           | cross-sectional |
| Yahya, et al       | Pakistan     | 2002 |           | 8 | Face-to-face interview       | population-based    | cross-sectional |
| Gupta, et al       | UK           | 2006 |           | 8 | WHQ WRQ                      | community           | cross-sectional |
|                    | India        |      |           | 8 | WHQ WRQ                      |                     |                 |
| Inayat, et al      | Pakistan     | 2017 |           | 8 | Face-to-face interview       | Health check-up     | cross-sectional |
| Mathialagan, et al | Malaysia     | 2022 | 2020      | 8 | MRS                          | community           | cross-sectional |
| Canário, et al     | Brazil       | 2012 | 2011      | 8 | Batt-Kupperman               | population-based    | cross-sectional |

|                             |            |      |           |   | Menopausal Index             |                 |                 |
|-----------------------------|------------|------|-----------|---|------------------------------|-----------------|-----------------|
| Rahman, et al               | Bangladesh | 2020 | 2017-2018 | 8 | MRS                          | Health check-up | cross-sectional |
| Abedzadeh-Kalahroudi, et al | Iran       | 2012 |           | 8 | MENQOL                       | community       | cross-sectional |
| Diyu, et al                 | Indonesian | 2022 |           | 8 | MRS                          | community       | cross-sectional |
| Zhang, et al                | China      | 2016 | 2012-2013 | 8 | KMI                          | community       | cross-sectional |
| Ryu, et al                  | Korea      | 2020 | 2010-2012 | 8 | MRS                          | Health check-up | cross-sectional |
| Ma, et al                   | China      | 2017 | 2014      | 8 | KMI                          | community       | cross-sectional |
| Fu, et al                   | China      | 2020 | 2018      | 8 | KMI                          | community       | cross-sectional |
| Liu, et al                  | China      | 2018 |           | 8 | KMI                          | community       | cross-sectional |
| Li, et al                   | China      | 2016 | 2014      | 8 | KMI                          | community       | cross-sectional |
| Joshi, et al                | India      | 2015 |           | 8 | MRS                          | community       | cross-sectional |
| Ghimire, et al              | Nepal      | 2015 |           | 8 | MRS                          | community       | cross-sectional |
| Joseph, et al               | India      | 2014 | 2011      | 8 | MRS                          | community       | cross-sectional |
| Dasgupta, et al             | India      | 2015 |           | 8 | Face-to-face interview       | community       | cross-sectional |
| Sievert, et al              | Bangladesh | 2008 | 2007      | 8 | Face-to-face interview       | community       | cross-sectional |
| Bindhu, et al               | India      | 2014 |           | 8 | the Greene Climacteric Scale | community       | cross-sectional |
| Srivastava, et al           | India      | 2014 |           | 8 | MRS                          | community       | cross-sectional |
| ROKHADE, et al              | India      | 2013 |           | 8 | Others                       | Health check-up | cross-sectional |
| Sun, et al                  | China      | 2014 | 2012-2013 | 8 | KMI                          | Health check-up | cross-sectional |
| Wong, et al                 | Singapore  | 2022 | 2014-2016 | 7 | PSQI, MRS, GAD, Centre for   | Health check-up | cross-sectional |

|                      |                                                       |      |                     |   |                                                                                  |                  |                 |
|----------------------|-------------------------------------------------------|------|---------------------|---|----------------------------------------------------------------------------------|------------------|-----------------|
|                      |                                                       |      |                     |   | Epidemiological Studies Depression Scale, the Pelvic Floor Disability Index      |                  |                 |
| Santo, et al         | Spain and Portugue                                    | 2023 | 2020-2022           | 8 | MRS, HADS                                                                        | community        | cross-sectional |
| Xu, et al            | China                                                 | 2016 |                     | 7 | Face-to-face interview , PSQI,HADS                                               | community        | cross-sectional |
| Lerner-Geva, et al   | Israel                                                | 2010 | 2004                | 8 | the Greene Climacteric Scale                                                     | community        | cross-sectional |
| Sweed, et al         | Egypt                                                 | 2012 | 2008-2009           | 8 | MRS                                                                              | community        | cross-sectional |
| Taher, et al         | Libya                                                 | 2012 | 2008-2009           | 8 | MENQOL                                                                           | community        | cross-sectional |
| Ryan, et al          | Australia                                             | 2009 | 2004                | 8 | the Center for Epidemiological Studies Depression Scale, Validated Questionnaire | population-based | cross-sectional |
| Beigi, et al         | Iran                                                  | 2012 |                     | 8 | Others                                                                           | Health check-up  | cross-sectional |
| G K, et al           | India                                                 | 2013 | 2012                | 8 | MENQOL                                                                           | Health check-up  | cross-sectional |
| Bernis, et al        | Spain                                                 | 2007 | 1996-1998,2002-2003 | 8 | Others                                                                           | Health check-up  | cross-sectional |
| Dibonaventura, et al | France, Germany, Italy, Spain, and the United Kingdom | 2013 | 2010                | 8 | MRS                                                                              | population-based | cross-sectional |
| Freeman, et al       | USA                                                   | 2009 |                     | 8 | CES-D                                                                            | population-based | cross-sectional |

|                 |            |      |           |   |                                                                                      |                  |                 |
|-----------------|------------|------|-----------|---|--------------------------------------------------------------------------------------|------------------|-----------------|
| Seib, et al     | Australia  | 2014 | 2011      | 8 | General Sleep Disturbance Scale [GSDS]                                               | electoral roll   | cross-sectional |
| Chedraui, et al | Ecuador    | 2007 |           | 8 | MRS                                                                                  | Health check-up  | cross-sectional |
| Ahlawat, et al  | India      | 2019 |           | 8 | HAM-D                                                                                | community        | cross-sectional |
| Bansal, et al   | India      | 2015 |           | 8 | The Zung Self-rating Depression Scale (SDS),The Zung Self-rating Anxiety Scale (SAS) | community        | cross-sectional |
| Dutta, et al    | India      | 2018 | 2017      | 7 | Others                                                                               | community        | cross-sectional |
| Nayak, et al    | India      | 2019 | 2017-2018 | 8 | IDS-SR                                                                               | community        | cross-sectional |
| Ps, et al       | India      | 2017 |           | 8 | PHQ-9                                                                                | community        | cross-sectional |
| Alam, et al     | Bangladesh | 2020 |           | 7 | PHQ-9                                                                                | population-based | cross-sectional |
| Shin, et al     | Korea      | 2005 |           | 8 | Questionnaire,BDI                                                                    | population-based | Cohort          |
| Fabbrini, et al | Italy      | 2015 |           | 8 | PSQI,BDI                                                                             | Health check-up  | cross-sectional |
| Luo, et al      | China      | 2020 | 2005      | 8 | HADS                                                                                 | community        | cross-sectional |
| Geng, et al     | China      | 2018 | 2015-2016 | 8 | Face-to-face interview                                                               | Health check-up  | cross-sectional |
| Moral, et al    | Spain      | 2018 | 2015      | 8 | Others                                                                               | Health check-up  | cross-sectional |
| Ahmed, et al    | Iraq       | 2013 | 2011      | 8 | Face-to-face interview                                                               | Health check-up  | cross-sectional |
| Xu, et al       | China      | 2020 | 2018      | 8 | ICIQ-SF                                                                              | population-based | cross-sectional |
| Islam, et al    | Bangladesh | 2018 | 2013-2014 | 7 | the Questionnaire for Urinary Incontinence                                           | population-based | cross-sectional |

|                  |           |      |           |   |                                                |                  |                 |
|------------------|-----------|------|-----------|---|------------------------------------------------|------------------|-----------------|
|                  |           |      |           |   | Diagnosis (QUID)                               |                  |                 |
| Yagmur, et al    | Turkey    | 2021 | 2017      | 8 | the Incontinence Quality of Life Questionnaire | community        | cross-sectional |
| Chung, et al     | Hong Kong | 2006 |           | 8 | the Greene Climacteric Scale                   | community        | cross-sectional |
| Hsu, et al       | Taiwan    | 2005 |           | 8 | PSQI, The 18-item Taiwanese Depression Scale   | community        | cross-sectional |
| Ward, et al      | UK        | 2010 | 2006      | 7 | Others                                         | population-based | cross-sectional |
| Pandey, et al    | Nepal     | 2020 | 2017-2018 | 8 | MRS                                            | Health check-up  | cross-sectional |
| Abdelaziz, et al | Saudi     | 2022 | 2021      | 8 | MRS, PSQI                                      | Health check-up  | cross-sectional |
| Liao, et al      | China     | 2019 | 2013-2016 | 8 | The Zung Self-rating Depression Scale (SDS)    | Health check-up  | cross-sectional |
| Sievert, et al   | USA       | 2007 | 2004      | 8 | Others                                         | community        | cross-sectional |
| Sievert, et al   | Mexico    | 2003 | 1999-2000 | 8 | Others                                         | community        | cross-sectional |
| Obermeyer, et al | USA       | 2004 | 2001-2002 | 8 | Face-to-face interview                         | community        | cross-sectional |
| Keenan, et al    | USA       | 2003 | 1997-1998 | 8 | Face-to-face interview                         | telephone        | cross-sectional |
| Jansson, et al   | Sweden    | 2003 | 1999      | 7 | Others                                         | community        | cross-sectional |
| Zhao, et al      | China     | 2000 |           | 8 | Batt-Kupperman Menopausal Index                | community        | cross-sectional |
| Lam, et al       | Hong Kong | 2003 | 1999-2000 | 8 | the Greene Climacteric Scale                   | population-based | cross-sectional |

|                     |           |      |      |   |                                                                   |                        |                 |
|---------------------|-----------|------|------|---|-------------------------------------------------------------------|------------------------|-----------------|
| Gollschewski, et al | Australia | 2004 | 2001 | 8 | the Greene Climacteric Scale                                      | community              | cross-sectional |
| Biri, et al         | Turkey    | 2005 | 2002 | 7 | Face-to-face interview                                            | Health check-up        | cross-sectional |
| Obermeyer, et al    | Morocco   | 2002 | 1995 | 8 | Face-to-face interview                                            | face to face interview | cross-sectional |
| Lin, et al          | Taiwan    | 2012 | 2002 | 8 | Taiwanese Depression Questionnaire                                | population-based       | cross-sectional |
| Loh, et al          | Singapore | 2005 | 2001 | 8 | Face-to-face interview                                            | population-based       | cross-sectional |
| Chaopotong, et al   | Thailand  | 2005 | 2005 | 7 | Others                                                            | community              | cross-sectional |
| Zhu, et al          | China     | 2022 | 2016 | 8 | Vaginal health index score and urinary distress inventory (UDI-6) | community              | cross-sectional |
| Huang, et al        | China     | 2010 | 2006 | 8 | Face-to-face interview                                            | community              | cross-sectional |
|                     | Malaysia  |      |      | 8 | Face-to-face interview                                            |                        |                 |
|                     | Taiwan    |      |      | 8 | Face-to-face interview                                            |                        |                 |
|                     | Thailand  |      |      | 8 | Face-to-face interview                                            |                        |                 |
|                     | Hong Kong |      |      | 8 | Face-to-face interview                                            |                        |                 |



|                  |           |      |           |   |                              |                  |                 |
|------------------|-----------|------|-----------|---|------------------------------|------------------|-----------------|
| Hunter, et al    | Spain     | 2012 | 2009-2010 | 8 | Hot Flush Rating Scale       | population-based | cross-sectional |
|                  | Panama    |      |           | 8 | Hot Flush Rating Scale       |                  |                 |
|                  | Chile     |      |           | 8 | Hot Flush Rating Scale       |                  |                 |
|                  | Ecuador   |      |           | 8 | Hot Flush Rating Scale       |                  |                 |
| Anderson, et al  | Australia | 2004 | 2001      | 8 | the Greene Climacteric Scale | electoral roles  | cross-sectional |
|                  | Japan     |      | 2002      | 8 | the Greene Climacteric Scale |                  |                 |
| Glod, et al      | USA       | 2006 | 1995-1997 | 8 | Face-to-face interview       | Community        | cross-sectional |
| Afshari, et al   | Iran      | 2015 | 2013-2014 | 7 | Hamilton Depression Scale    |                  |                 |
| Goncalves, et al | Portugue  | 2013 |           | 8 | Questionnaire,CES-D          |                  |                 |
| Onya, et al      | Nigeria   | 2018 | 2017      | 8 | CES-D                        |                  |                 |
| Yen, et al       | Taiwan    | 2009 |           | 8 | CES-D                        | Community        | cross-sectional |
| Timur, et al     | Turkey    | 2010 | 2008      | 8 | BDI                          | Community        | cross-sectional |
| Zang, et al      | China     | 2016 |           | 8 | Questionnaire,SDS            | Community        | cross-sectional |
| Masjoudl, et al  | Iran      | 2017 | 2013-2014 | 8 | MRS                          | Community        | cross-sectional |
| Kapoor, et al    | USA       | 2021 | 2015-2016 | 7 | GAD-7, PHQ-9                 | Health check-up  | cross-sectional |
| Durairaj, et al  | India     | 2022 | 2019      | 8 | MRS                          | Community        | cross-sectional |
| Bala, et al      | India     | 2022 |           | 8 | Face-to-face                 | population-based | cross-sectional |

|                            |          |      |           |   |                                   |                       |                 |
|----------------------------|----------|------|-----------|---|-----------------------------------|-----------------------|-----------------|
|                            |          |      |           |   | interview                         |                       |                 |
| Stefanopoulou, et al       | India    | 2014 | 2010-2011 | 8 | Hot Flush Rating Scale            | population-based      | cross-sectional |
| Abou-Raya, et al           | Egypt    | 2016 | 2013-2014 | 7 | MRS                               | Health check-up       | cross-sectional |
| Krajewska-Ferishah, et al1 | Poland   | 2022 |           | 8 | BDI,Questionnaire                 | Health check-up       | cross-sectional |
| Krajewska-Ferishah, et al2 | Belarus  | 2022 |           | 8 | BDI,Questionnaire                 | Health check-up       | cross-sectional |
| Krajewska-Ferishah, et al3 | Belgium  | 2022 |           | 8 | BDI,Questionnaire                 | Health check-up       | cross-sectional |
| Krajewska-Ferishah, et al4 | Greece   | 2022 |           | 8 | BDI,Questionnaire                 | Health check-up       | cross-sectional |
| Ogwumike, et al            | Nigeria  | 2012 | 2011      | 8 | Others                            | Community             | cross-sectional |
| Ornat, et al               | Spain    | 2013 | 2012      | 8 | CSFQ-14                           | Health check-up       | cross-sectional |
| Wang, et al                | Taiwan   | 2013 | 2008-2009 | 8 | CES-D                             | Community             | cross-sectional |
| Gao, et al                 | China    | 2013 | 2009-2010 | 8 | Others                            | Community             | cross-sectional |
| Sierra, et al              | Ecuador  | 2004 | 2000      | 8 | the Greene Climacteric Scale      | Health check-up       | cross-sectional |
| Castelo-Branco, et al      | Bolivia  | 2005 | 2002      | 8 | Face-to-face interview            | Community             | cross-sectional |
| Ahn, et al                 | Korea    | 2009 | 2006      | 8 | IOF Quality of Life Questionnaire | newspaper advertising | cross-sectional |
| Jin, et al                 | China    | 2014 | 2011-2012 | 8 | KMI                               | Health check-up       | cross-sectional |
| Pérez-López, et al         | Colombia | 2013 | 2009-2011 | 8 | CS-10                             | population-based      | cross-sectional |
| Huang, et al               | China    | 2020 | 2018-2019 | 8 | KMI                               | Health check-up       | cross-sectional |
| Dasgupta, et al            | India    | 2012 | 2009-2010 | 8 | Others                            | Community             | cross-sectional |

|                     |           |      |           |   |                                                                   |                        |                 |
|---------------------|-----------|------|-----------|---|-------------------------------------------------------------------|------------------------|-----------------|
| Huseth-Zosel, et al | China     | 2014 | 2008-2016 | 8 | Face-to-face interview                                            | Community              | cross-sectional |
| Ornat, et al        | Spain     | 2014 | 2012      | 8 | Jenkins Sleep Scale                                               | Health check-up        | cross-sectional |
| Legorreta, et al    | Mexico    | 2013 | 2010-2011 | 8 | MRS                                                               | Health check-up        | cross-sectional |
| Aydin, et al        | Turkey    | 2013 | 2005-2012 | 8 | Others                                                            | Health check-up        | cross-sectional |
| Zhang, et al        | China     | 2020 |           | 7 | Others                                                            | Health check-up        | cross-sectional |
| Wu, et al           | China     | 2023 | 2022      | 8 | KMI                                                               | Community              | cross-sectional |
| Shea, et al         | Canada    | 2020 |           | 8 | Others                                                            | population-based       | cross-sectional |
| Abdullah, et al     | Malaysia  | 2016 |           | 8 | MRS                                                               | Community              | cross-sectional |
| Chu, et al          | China     | 2022 |           | 7 | KMI, HAMD                                                         | Health check-up        | cross-sectional |
| Barghandan, et al   | Iran      | 2021 | 2018      | 8 | KMI, BDI, STAI                                                    | Health check-up        | cross-sectional |
| Hickey, et al       | Australia | 2017 | 2015-2016 | 8 | MRS                                                               | online and paper-based | cross-sectional |
| Blell, et al        | UK        | 2014 |           | 8 | Face-to-face interview                                            | Community              | cross-sectional |
| Dienye, et al       | Nigeria   | 2013 | 2010      | 9 | MRS                                                               | Health check-up        | cross-sectional |
| Whiteley, et al     | USA       | 2013 | 2005      | 7 | Face-to-face interview                                            | population-based       | cross-sectional |
| Bener, et al        | Qatar     | 2017 | 2012-2014 | 8 | DASS                                                              | Health check-up        | cross-sectional |
| Olowokere, et al    | Nigeria   | 2020 |           | 8 | MRS                                                               | Community              | cross-sectional |
| Zhu, et al          | China     | 2021 | 2013      | 8 | Female Sexual Function Index (FSFI), the Greene Climacteric Scale | Health check-up        | cross-sectional |
| Zhang, et al        | China     | 2009 |           | 8 | Face-to-face interview                                            | Community              | cross-sectional |

|                         |            |      |           |   |                              |                       |                 |
|-------------------------|------------|------|-----------|---|------------------------------|-----------------------|-----------------|
| Salazar-Pousada, et al1 | Colombia   | 2017 |           | 8 | CESD-10, Questionnaire       | population-based      | cross-sectional |
| Salazar-Pousada, et al2 | Ecuador    | 2017 |           | 8 | CESD-10, Questionnaire       | population-based      | cross-sectional |
| Salazar-Pousada, et al3 | Peru       | 2017 |           | 8 | CESD-10, Questionnaire       | population-based      | cross-sectional |
| Salazar-Pousada, et al4 | Paraguay   | 2017 |           | 8 | CESD-10, Questionnaire       | population-based      | cross-sectional |
| Whiteman, et al         | USA        | 2003 | 2001      | 8 | Others                       | email                 | cross-sectional |
| Ruan, et al             | China      | 2017 | 2008-2015 | 8 | KMI                          | Health check-up       | cross-sectional |
| An, et al               | Korea      | 2022 | 2015-2018 | 9 | CESD,PSQI                    | Health check-up       | cross-sectional |
| Devi, et al             | USA        | 2005 |           | 8 | Face-to-face interview       | Community             | cross-sectional |
| Li, et al               | China      | 2019 | 2014-2015 | 8 | PHQ-9                        | population-based      | Cohort          |
| Xu, et al               | USA        | 2005 | 2000-2001 | 9 | the Greene Climacteric Scale | Health check-up       | cross-sectional |
| Yilmaz, et al           | Turkey     | 2020 | 2019      | 8 | BDI                          | Community             | cross-sectional |
| Islam, et al            | Bangladesh | 2016 | 2013-2014 | 7 | MENQOL                       | population-based      | cross-sectional |
| Shakhatreh, et al       | Jordan     | 2006 | 2003      | 8 | Others                       | Community             | cross-sectional |
| Obermeyer, et al        | Lebanon    | 2007 |           | 8 | Face-to-face interview       | Community             | cross-sectional |
| Al-Qutob, et al         | Jordan     | 2000 | 1997      | 8 | Face-to-face interview       | Community             | cross-sectional |
| Chae, et al             | Korea      | 2014 | 2010      | 7 | Others                       | Health check-up       | cross-sectional |
| Veigh, et al            | Australia  | 2005 |           | 8 | WHAS                         | population-based      | cross-sectional |
| Lampio, et al           | Finland    | 2014 |           | 8 | Basic Nordic Sleep           | newspaper advertising | Cohort          |

|                    |          |      |           |   |                                     |                       |                 |
|--------------------|----------|------|-----------|---|-------------------------------------|-----------------------|-----------------|
|                    |          |      |           |   | Questionnaire,BDI,<br>Questionnaire |                       |                 |
| Oppermann, et al   | Brazil   | 2012 | 2001-2002 | 8 | Face-to-face<br>interview, SRQ-20   | population-based      | cross-sectional |
| An, et al          | China    | 2023 |           | 9 | KMI                                 | population-based      | cross-sectional |
| Kamal, et al       | Egypt    | 2017 | 2015      | 9 | MRS                                 | Community             | cross-sectional |
| Rajbhandari, et al | Nepal    | 2017 | 2014-2015 | 9 | Others                              | Community             | cross-sectional |
| Cortes, et al      | Spain    | 2023 | 2020      | 7 | Others                              | newspaper advertising | cross-sectional |
| Baig, et al        | Pakistan | 2006 |           | 8 | Face-to-face<br>interview           | population-based      | cross-sectional |
| Chalise, et al     | Nepal    | 2022 | 2021      | 6 | Face-to-face<br>interview           | Health check-up       | cross-sectional |

**Supplementary Figure 1. Forest plot of prevalence of hot flashes among middle-aged women**

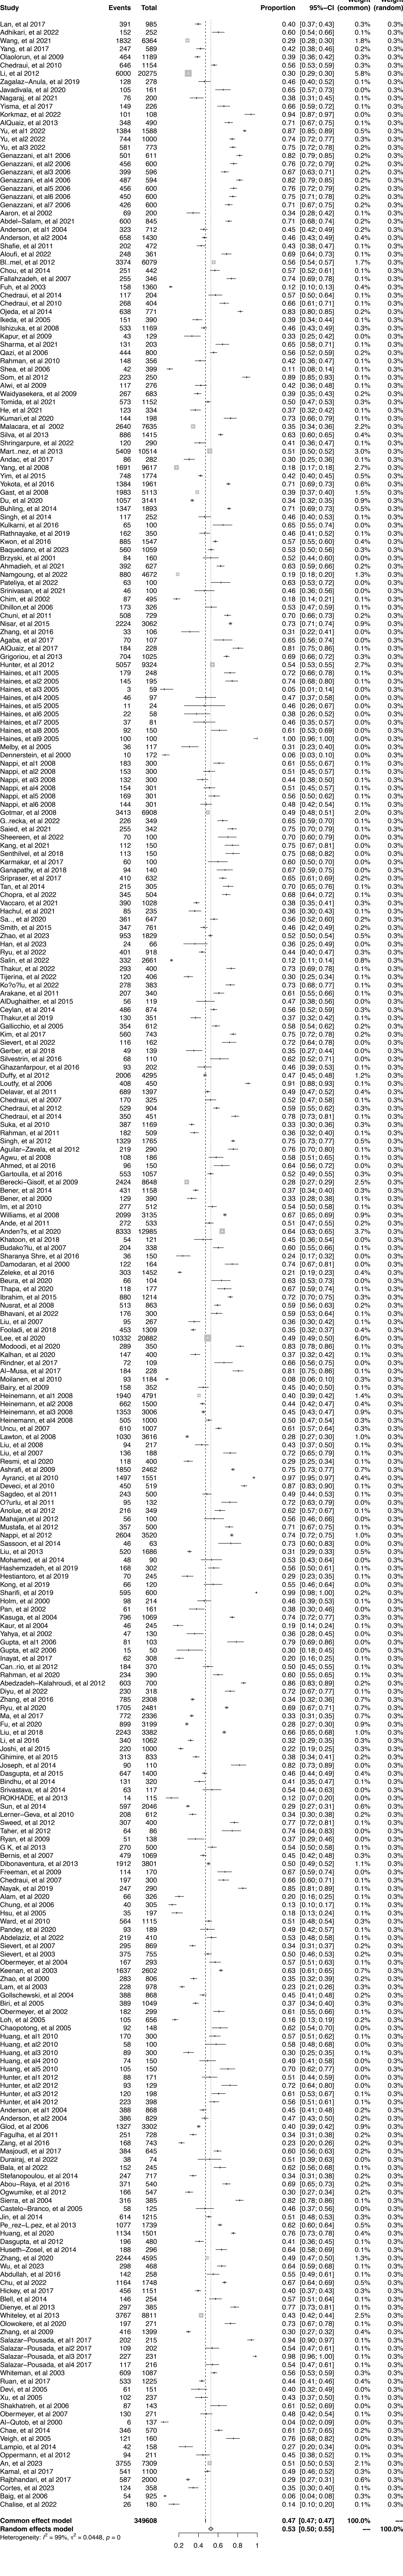

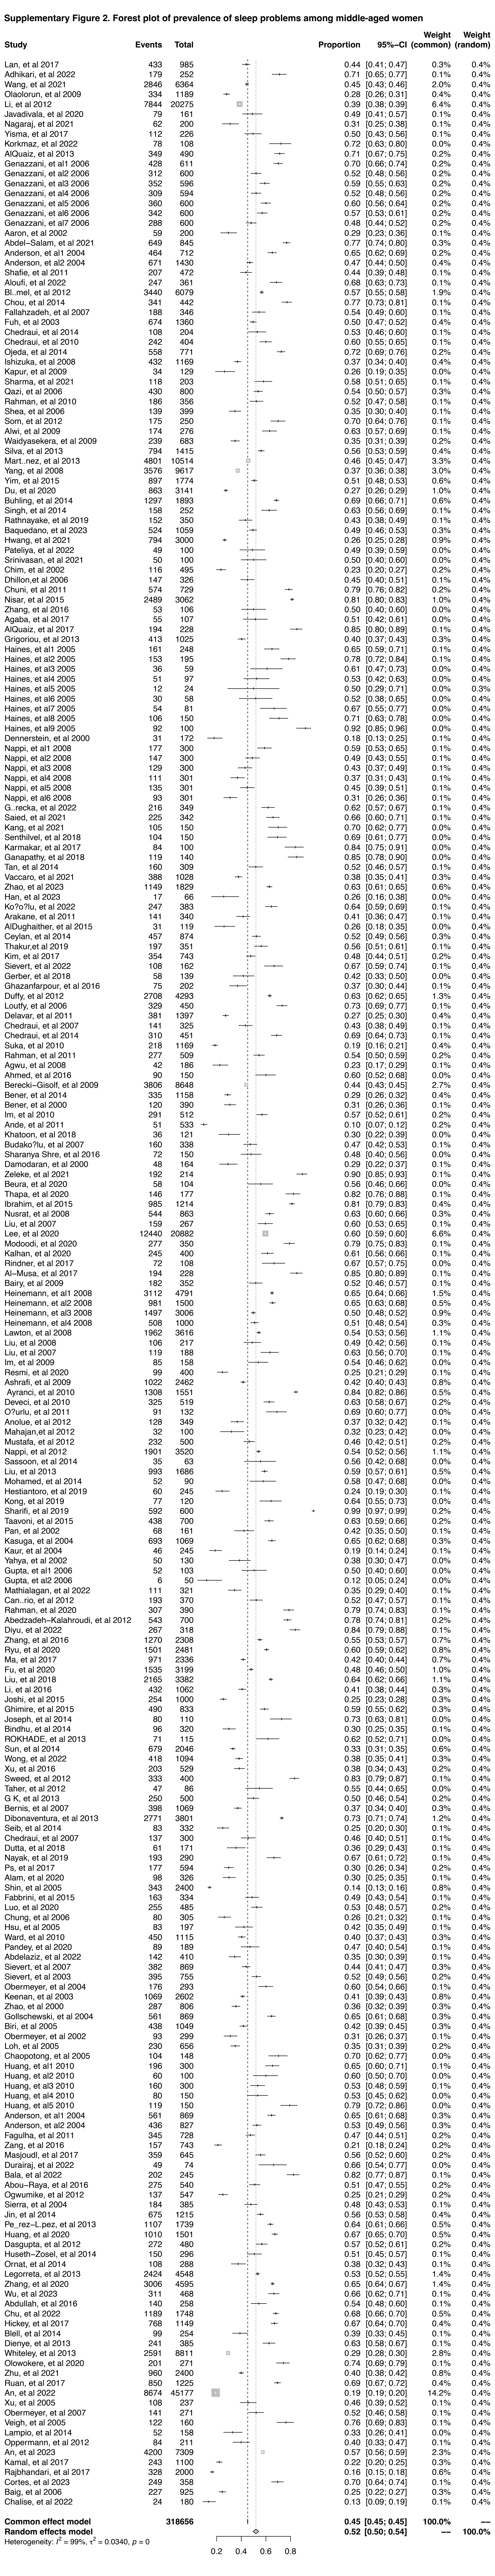

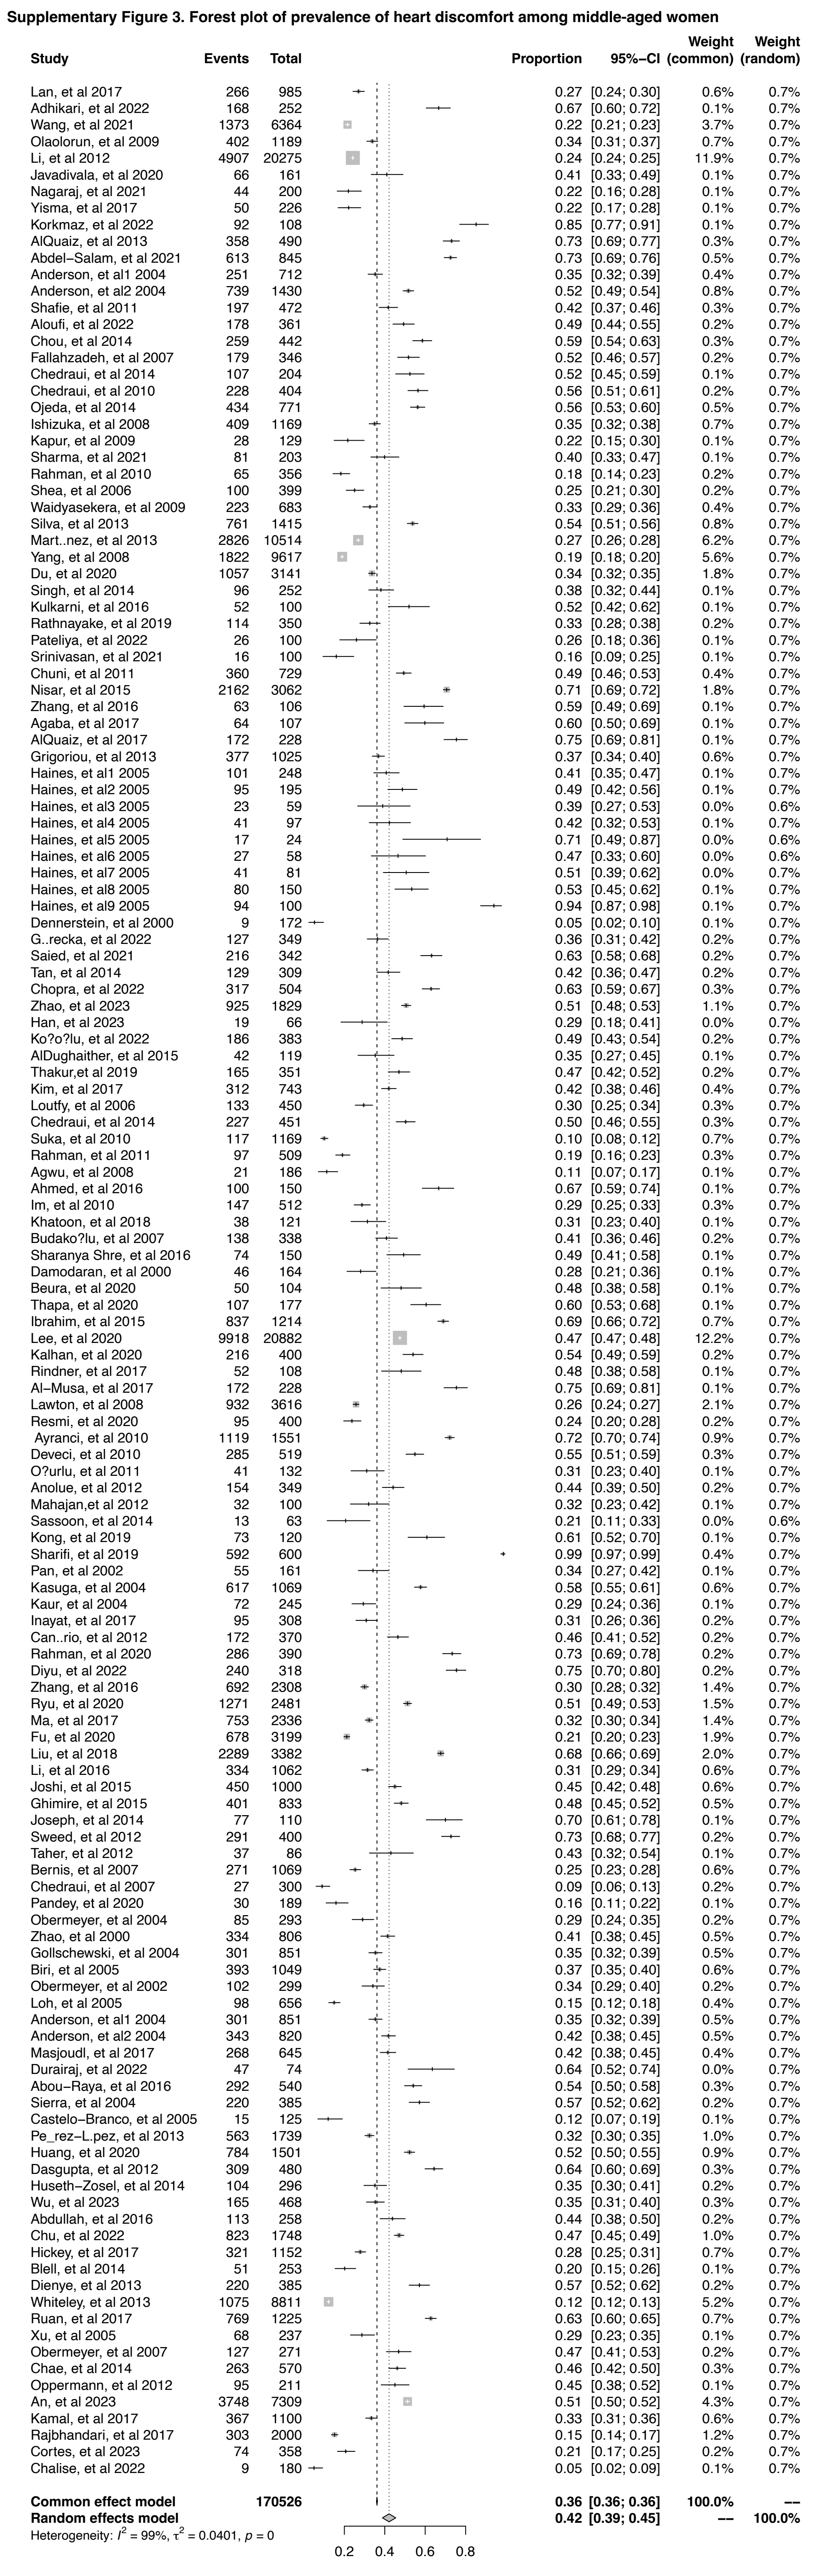



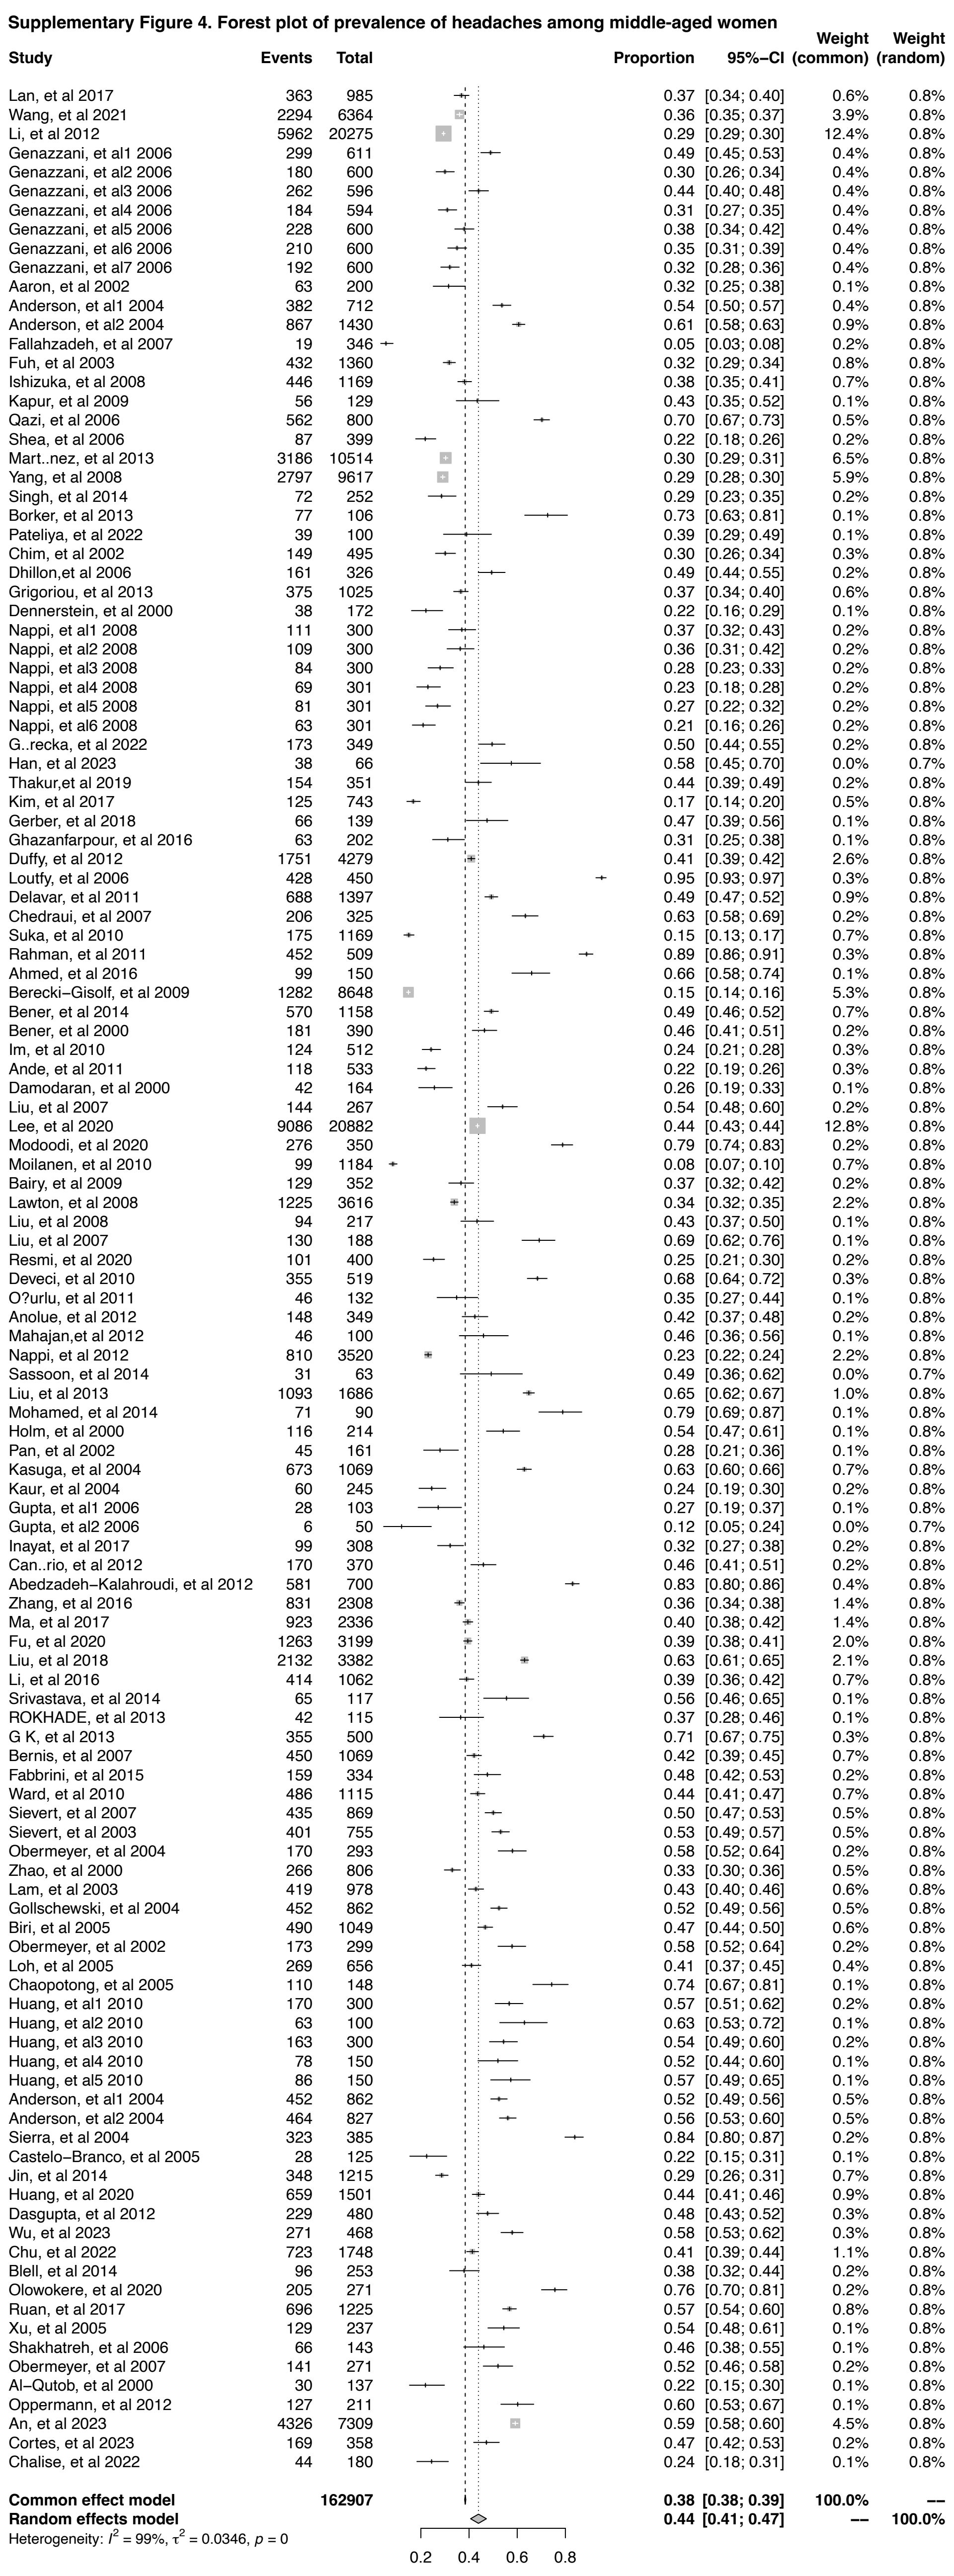

| Study                            | Events | Total | Proportion | 95%–CI       | Weight (common) | Weight (random) |
|----------------------------------|--------|-------|------------|--------------|-----------------|-----------------|
| Lan, et al 2017                  | 537    | 985   | 0.55       | [0.51; 0.58] | 0.4%            | 0.5%            |
| Adhikari, et al 2022             | 214    | 252   | 0.85       | [0.80; 0.89] | 0.1%            | 0.5%            |
| Wang, et al 2021                 | 2009   | 6364  | 0.32       | [0.30; 0.33] | 2.7%            | 0.5%            |
| Olaolorun, et al 2009            | 702    | 1189  | 0.59       | [0.56; 0.62] | 0.5%            | 0.5%            |
| Li, et al 2012                   | 7847   | 20275 | 0.39       | [0.38; 0.39] | 8.6%            | 0.5%            |
| Javadivala, et al 2020           | 114    | 161   | 0.71       | [0.63; 0.78] | 0.1%            | 0.5%            |
| Nagaraj, et al 2021              | 127    | 200   | 0.64       | [0.56; 0.70] | 0.1%            | 0.5%            |
| Yisma, et al 2017                | 73     | 226   | 0.32       | [0.26; 0.39] | 0.1%            | 0.5%            |
| Korkmaz, et al 2022              | 69     | 108   | 0.64       | [0.54; 0.73] | 0.0%            | 0.5%            |
| AlQuaiz, et al 2013              | 411    | 490   | 0.84       | [0.80; 0.87] | 0.2%            | 0.5%            |
| Abdel–Salam, et al 2021          | 678    | 845   | 0.80       | [0.77; 0.83] | 0.4%            | 0.5%            |
| Anderson, et al1 2004            | 555    | 712   | 0.78       | [0.75; 0.81] | 0.3%            | 0.5%            |
| Anderson, et al2 2004            | 1007   | 1430  | 0.70       | [0.68; 0.73] | 0.6%            | 0.5%            |
| Shafie, et al 2011               | 351    | 472   | 0.74       | [0.70; 0.78] | 0.2%            | 0.5%            |
| Aloufi, et al 2022               | 286    | 361   | 0.79       | [0.75; 0.83] | 0.2%            | 0.5%            |
| Chou, et al 2014                 | 391    | 442   | 0.88       | [0.85; 0.91] | 0.2%            | 0.5%            |
| Fallahzadeh, et al 2007          | 286    | 346   | 0.83       | [0.78; 0.86] | 0.1%            | 0.5%            |
| Fuh, et al 2003                  | 448    | 1360  | 0.33       | [0.30; 0.36] | 0.6%            | 0.5%            |
| Chedraui, et al 2014             | 178    | 204   | 0.87       | [0.82; 0.92] | 0.1%            | 0.5%            |
| Chedraui, et al 2010             | 323    | 404   | 0.80       | [0.76; 0.84] | 0.2%            | 0.5%            |
| Ojeda, et al 2014                | 600    | 771   | 0.78       | [0.75; 0.81] | 0.3%            | 0.5%            |
| Ishizuka, et al 2008             | 881    | 1169  | 0.75       | [0.73; 0.78] | 0.5%            | 0.5%            |
| Kapur, et al 2009                | 72     | 129   | 0.56       | [0.47; 0.65] | 0.1%            | 0.5%            |
| Sharma, et al 2021               | 158    | 203   | 0.78       | [0.71; 0.83] | 0.1%            | 0.5%            |
| Qazi, et al 2006                 | 474    | 800   | 0.59       | [0.56; 0.63] | 0.3%            | 0.5%            |
| Rahman, et al 2010               | 285    | 356   | 0.80       | [0.76; 0.84] | 0.2%            | 0.5%            |
| Shea, et al 2006                 | 176    | 399   | 0.44       | [0.39; 0.49] | 0.2%            | 0.5%            |
| Som, et al 2012                  | 170    | 250   | 0.68       | [0.62; 0.74] | 0.1%            | 0.5%            |
| Alwi, et al 2009                 | 228    | 276   | 0.83       | [0.78; 0.87] | 0.1%            | 0.5%            |
| Waidyasekera, et al 2009         | 510    | 683   | 0.75       | [0.71; 0.78] | 0.3%            | 0.5%            |
| Silva, et al 2013                | 1058   | 1415  | 0.75       | [0.72; 0.77] | 0.6%            | 0.5%            |
| Martinez, et al 2013             | 4115   | 10514 | 0.39       | [0.38; 0.40] | 4.4%            | 0.5%            |
| Yang, et al 2008                 | 3436   | 9617  | 0.36       | [0.35; 0.37] | 4.1%            | 0.5%            |
| Yim, et al 2015                  | 1248   | 1774  | 0.70       | [0.68; 0.72] | 0.7%            | 0.5%            |
| Yokota, et al 2016               | 1104   | 1961  | 0.56       | [0.54; 0.59] | 0.8%            | 0.5%            |
| Du, et al 2020                   | 905    | 3141  | 0.29       | [0.27; 0.30] | 1.3%            | 0.5%            |
| Singh, et al 2014                | 149    | 252   | 0.59       | [0.53; 0.65] | 0.1%            | 0.5%            |
| Kulkarni, et al 2016             | 92     | 100   | 0.92       | [0.85; 0.96] | 0.0%            | 0.5%            |
| Borker, et al 2013               | 56     | 106   | 0.53       | [0.43; 0.63] | 0.0%            | 0.5%            |
| Rathnayake, et al 2019           | 290    | 350   | 0.83       | [0.78; 0.87] | 0.1%            | 0.5%            |
| Pateliya, et al 2022             | 78     | 100   | 0.78       | [0.69; 0.86] | 0.0%            | 0.5%            |
| Srinivasan, et al 2021           | 80     | 100   | 0.80       | [0.71; 0.87] | 0.0%            | 0.5%            |
| Chim, et al 2002                 | 256    | 495   | 0.52       | [0.47; 0.56] | 0.2%            | 0.5%            |
| Dhillon, et al 2006              | 230    | 326   | 0.71       | [0.65; 0.75] | 0.1%            | 0.5%            |
| Chuni, et al 2011                | 500    | 729   | 0.69       | [0.65; 0.72] | 0.3%            | 0.5%            |
| Nisar, et al 2015                | 2567   | 3062  | 0.84       | [0.82; 0.85] | 1.3%            | 0.5%            |
| Zhang, et al 2016                | 85     | 106   | 0.80       | [0.71; 0.87] | 0.0%            | 0.5%            |
| Agaba, et al 2017                | 66     | 107   | 0.62       | [0.52; 0.71] | 0.0%            | 0.5%            |
| AlQuaiz, et al 2017              | 219    | 228   | 0.96       | [0.93; 0.98] | 0.1%            | 0.5%            |
| Grigoriou, et al 2013            | 485    | 1025  | 0.47       | [0.44; 0.50] | 0.4%            | 0.5%            |
| Haines, et al1 2005              | 202    | 248   | 0.81       | [0.76; 0.86] | 0.1%            | 0.5%            |
| Haines, et al2 2005              | 175    | 195   | 0.90       | [0.85; 0.94] | 0.1%            | 0.5%            |
| Haines, et al3 2005              | 55     | 59    | 0.93       | [0.84; 0.98] | 0.0%            | 0.5%            |
| Haines, et al4 2005              | 74     | 97    | 0.76       | [0.67; 0.84] | 0.0%            | 0.5%            |
| Haines, et al5 2005              | 23     | 24    | 0.96       | [0.79; 1.00] | 0.0%            | 0.4%            |
| Haines, et al6 2005              | 47     | 58    | 0.81       | [0.69; 0.90] | 0.0%            | 0.5%            |
| Haines, et al7 2005              | 67     | 81    | 0.83       | [0.73; 0.90] | 0.0%            | 0.5%            |
| Haines, et al8 2005              | 135    | 150   | 0.90       | [0.84; 0.94] | 0.1%            | 0.5%            |
| Haines, et al9 2005              | 96     | 100   | 0.96       | [0.90; 0.99] | 0.0%            | 0.5%            |
| Dennerstein, et al 2000          | 41     | 172   | 0.24       | [0.18; 0.31] | 0.1%            | 0.5%            |
| Groenck, et al 2022              | 191    | 349   | 0.55       | [0.49; 0.60] | 0.1%            | 0.5%            |
| Saied, et al 2021                | 318    | 342   | 0.93       | [0.90; 0.95] | 0.1%            | 0.5%            |
| Sheereen, et al 2022             | 94     | 100   | 0.94       | [0.87; 0.98] | 0.0%            | 0.5%            |
| Kang, et al 2021                 | 133    | 150   | 0.89       | [0.82; 0.93] | 0.1%            | 0.5%            |
| Senthilvel, et al 2018           | 136    | 150   | 0.91       | [0.85; 0.95] | 0.1%            | 0.5%            |
| Karmakar, et al 2017             | 84     | 100   | 0.84       | [0.75; 0.91] | 0.0%            | 0.5%            |
| Ganapathy, et al 2018            | 135    | 140   | 0.96       | [0.92; 0.99] | 0.1%            | 0.5%            |
| Tan, et al 2014                  | 201    | 309   | 0.65       | [0.59; 0.70] | 0.1%            | 0.5%            |
| Chopra, et al 2022               | 395    | 504   | 0.78       | [0.75; 0.82] | 0.2%            | 0.5%            |
| Vaccaro, et al 2021              | 325    | 1028  | 0.32       | [0.29; 0.35] | 0.4%            | 0.5%            |
| Zhao, et al 2023                 | 1203   | 1829  | 0.66       | [0.64; 0.68] | 0.8%            | 0.5%            |
| Han, et al 2023                  | 40     | 66    | 0.61       | [0.48; 0.72] | 0.0%            | 0.5%            |
| Kofole, et al 2022               | 298    | 383   | 0.78       | [0.73; 0.82] | 0.2%            | 0.5%            |
| AlDughaiter, et al 2015          | 96     | 119   | 0.81       | [0.72; 0.87] | 0.1%            | 0.5%            |
| Ceylan, et al 2014               | 691    | 874   | 0.79       | [0.76; 0.82] | 0.4%            | 0.5%            |
| Thakur, et al 2019               | 176    | 351   | 0.50       | [0.45; 0.55] | 0.1%            | 0.5%            |
| Kim, et al 2017                  | 280    | 743   | 0.38       | [0.34; 0.41] | 0.3%            | 0.5%            |
| Sievert, et al 2022              | 132    | 162   | 0.81       | [0.75; 0.87] | 0.1%            | 0.5%            |
| Gerber, et al 2018               | 71     | 139   | 0.51       | [0.42; 0.60] | 0.1%            | 0.5%            |
| Ghazanfarpour, et al 2016        | 73     | 202   | 0.36       | [0.30; 0.43] | 0.1%            | 0.5%            |
| Duffy, et al 2012                | 2470   | 4288  | 0.58       | [0.56; 0.59] | 1.8%            | 0.5%            |
| Loutfy, et al 2006               | 325    | 450   | 0.72       | [0.68; 0.76] | 0.2%            | 0.5%            |
| Delavar, et al 2011              | 988    | 1397  | 0.71       | [0.68; 0.73] | 0.6%            | 0.5%            |
| Chedraui, et al 2007             | 274    | 325   | 0.84       | [0.80; 0.88] | 0.1%            | 0.5%            |
| Chedraui, et al 2014             | 399    | 451   | 0.88       | [0.85; 0.91] | 0.2%            | 0.5%            |
| Suka, et al 2010                 | 541    | 1169  | 0.46       | [0.43; 0.49] | 0.5%            | 0.5%            |
| Rahman, et al 2011               | 388    | 509   | 0.76       | [0.72; 0.80] | 0.2%            | 0.5%            |
| Agwu, et al 2008                 | 48     | 186   | 0.26       | [0.20; 0.33] | 0.1%            | 0.5%            |
| Ahmed, et al 2016                | 96     | 150   | 0.64       | [0.56; 0.72] | 0.1%            | 0.5%            |
| Berecki-Gisolf, et al 2009       | 1399   | 8648  | 0.16       | [0.15; 0.17] | 3.7%            | 0.5%            |
| Bener, et al 2014                | 413    | 1158  | 0.36       | [0.33; 0.39] | 0.5%            | 0.5%            |
| Bener, et al 2000                | 135    | 390   | 0.35       | [0.30; 0.40] | 0.2%            | 0.5%            |
| Im, et al 2010                   | 266    | 512   | 0.52       | [0.48; 0.56] | 0.2%            | 0.5%            |
| Ande, et al 2011                 | 287    | 533   | 0.54       | [0.50; 0.58] | 0.2%            | 0.5%            |
| Khatoon, et al 2018              | 83     | 121   | 0.69       | [0.60; 0.77] | 0.1%            | 0.5%            |
| Budako?lu, et al 2007            | 174    | 338   | 0.51       | [0.46; 0.57] | 0.1%            | 0.5%            |
| Sharanya Shre, et al 2016        | 116    | 150   | 0.77       | [0.70; 0.84] | 0.1%            | 0.5%            |
| Damodaran, et al 2000            | 110    | 164   | 0.67       | [0.59; 0.74] | 0.1%            | 0.5%            |
| Beura, et al 2020                | 98     | 104   | 0.94       | [0.88; 0.98] | 0.0%            | 0.5%            |
| Thapa, et al 2020                | 141    | 177   | 0.80       | [0.73; 0.85] | 0.1%            | 0.5%            |
| Ibrahim, et al 2015              | 1030   | 1214  | 0.85       | [0.83; 0.87] | 0.5%            | 0.5%            |
| Nusrat, et al 2008               | 653    | 863   | 0.76       | [0.73; 0.78] | 0.4%            | 0.5%            |
| Liu, et al 2007                  | 182    | 267   | 0.68       | [0.62; 0.74] | 0.1%            | 0.5%            |
| Lee, et al 2020                  | 12152  | 20882 | 0.58       | [0.58; 0.59] | 8.8%            | 0.5%            |
| Modoodi, et al 2020              | 189    | 350   | 0.54       | [0.49; 0.59] | 0.1%            | 0.5%            |
| Kalhan, et al 2020               | 224    | 400   | 0.56       | [0.51; 0.61] | 0.2%            | 0.5%            |
| Rindner, et al 2017              | 66     | 108   | 0.61       | [0.51; 0.70] | 0.0%            | 0.5%            |
| Al-Musa, et al 2017              | 219    | 228   | 0.96       | [0.93; 0.98] | 0.1%            | 0.5%            |
| Moilanen, et al 2010             | 265    | 1184  | 0.22       | [0.20; 0.25] | 0.5%            | 0.5%            |
| Bairy, et al 2009                | 236    | 352   | 0.67       | [0.62; 0.72] | 0.1%            | 0.5%            |
| Heinemann, et al1 2008           | 3186   | 4791  | 0.66       | [0.65; 0.68] | 2.0%            | 0.5%            |
| Heinemann, et al2 2008           | 1010   | 1500  | 0.67       | [0.65; 0.70] | 0.6%            | 0.5%            |
| Heinemann, et al3 2008           | 1849   | 3006  | 0.62       | [0.60; 0.63] | 1.3%            | 0.5%            |
| Heinemann, et al4 2008           | 751    | 1000  | 0.75       | [0.72; 0.78] | 0.4%            | 0.5%            |
| Lawton, et al 2008               | 2317   | 3616  | 0.64       | [0.62; 0.66] | 1.5%            | 0.5%            |
| Liu, et al 2008                  | 129    | 217   | 0.59       | [0.53; 0.66] | 0.1%            | 0.5%            |
| Liu, et al 2007                  | 159    | 188   | 0.85       | [0.79; 0.89] | 0.1%            | 0.5%            |
| Im, et al 2009                   | 82     | 158   | 0.52       | [0.44; 0.60] | 0.1%            | 0.5%            |
| Resmi, et al 2020                | 143    | 400   | 0.36       | [0.31; 0.41] | 0.2%            | 0.5%            |
| Ashrafi, et al 2009              | 1755   | 2462  | 0.71       | [0.69; 0.73] | 1.0%            | 0.5%            |
| Deveci, et al 2010               | 269    | 519   | 0.52       | [0.47; 0.56] | 0.2%            | 0.5%            |
| O?urlu, et al 2011               | 85     | 132   | 0.64       | [0.56; 0.73] | 0.1%            | 0.5%            |
| Anolue, et al 2012               | 272    | 349   | 0.78       | [0.73; 0.82] | 0.1%            | 0.5%            |
| Mahajan, et al 2012              | 51     | 100   | 0.51       | [0.41; 0.61] | 0.0%            | 0.5%            |
| Nappi, et al 2012                | 1056   | 3520  | 0.30       | [0.28; 0.32] | 1.5%            | 0.5%            |
| Sassoon, et al 2014              | 38     | 63    | 0.60       | [0.47; 0.72] | 0.0%            | 0.5%            |
| Liu, et al 2013                  | 1173   | 1686  | 0.70       | [0.67; 0.72] | 0.7%            | 0.5%            |
| Mohamed, et al 2014              | 74     | 90    | 0.82       | [0.73; 0.89] | 0.0%            | 0.5%            |
| Kong, et al 2019                 | 88     | 120   | 0.73       | [0.64; 0.81] | 0.1%            | 0.5%            |
| Sharifi, et al 2019              | 591    | 600   | 0.98       | [0.97; 0.99] | 0.3%            | 0.5%            |
| Holm, et al 2000                 | 133    | 214   | 0.62       | [0.55; 0.69] | 0.1%            | 0.5%            |
| Kasuga, et al 2004               | 913    | 1069  | 0.85       | [0.83; 0.87] | 0.5%            | 0.5%            |
| Kaur, et al 2004                 | 92     | 245   | 0.38       | [0.31; 0.44] | 0.1%            | 0.5%            |
| Gupta, et al1 2006               | 44     | 103   | 0.43       | [0.33; 0.53] | 0.0%            | 0.5%            |
| Gupta, et al2 2006               | 7      | 50    | 0.14       | [0.06; 0.27] | 0.0%            | 0.4%            |
| Canario, et al 2012              | 267    | 370   | 0.72       | [0.67; 0.77] | 0.2%            | 0.5%            |
| Rahman, et al 2020               | 330    | 390   | 0.85       | [0.81; 0.88] | 0.2%            | 0.5%            |
| Abedzadeh–Kalahroudi, et al 2012 | 619    | 700   | 0.88       | [0.86; 0.91] | 0.3%            | 0.5%            |
| Diyu, et al 2022                 | 274    | 318   | 0.86       | [0.82; 0.90] | 0.1%            | 0.5%            |
| Zhang, et al 2016                | 1062   | 2308  | 0.46       | [0.44; 0.48] | 1.0%            | 0.5%            |
| Ryu, et al 2020                  | 1506   | 2481  | 0.61       | [0.59; 0.63] | 1.0%            | 0.5%            |
| Ma, et al 2017                   | 890    | 2336  | 0.38       | [0.36; 0.40] | 1.0%            | 0.5%            |
| Fu, et al 2020                   | 1074   | 3199  | 0.34       | [0.32; 0.35] | 1.4%            | 0.5%            |
| Liu, et al 2018                  | 2218   | 3382  | 0.66       | [0.64; 0.67] | 1.4%            | 0.5%            |
| Li, et al 2016                   | 398    | 1062  | 0.37       | [0.35; 0.40] | 0.4%            | 0.5%            |
| Joshi, et al 2015                | 736    | 1000  | 0.74       | [0.71; 0.76] | 0.4%            | 0.5%            |
| Ghimire, et al 2015              | 594    | 833   | 0.71       | [0.68; 0.74] | 0.4%            | 0.5%            |
| Joseph, et al 2014               | 94     | 110   | 0.85       | [0.77; 0.91] | 0.0%            | 0.5%            |
| Bindhu, et al 2014               | 115    | 320   | 0.36       | [0.31; 0.41] | 0.1%            | 0.5%            |
| ROKHADE, et al 2013              | 59     | 115   | 0.51       | [0.42; 0.61] | 0.0%            | 0.5%            |
| Sweed, et al 2012                | 361    | 400   | 0.90       | [0.87; 0.93] | 0.2%            | 0.5%            |
| Taher, et al 2012                | 64     | 86    | 0.74       | [0.64; 0.83] | 0.0%            | 0.5%            |
| G K, et al 2013                  | 395    | 500   | 0.79       | [0.75; 0.82] | 0.2%            | 0.5%            |
| Bernis, et al 2007               | 684    | 1069  | 0.64       | [0.61; 0.67] | 0.5%            | 0.5%            |
| Chedraui, et al 2007             | 231    | 300   | 0.77       | [0.72; 0.82] | 0.1%            | 0.5%            |
| Nayak, et al 2019                | 254    | 290   | 0.88       | [0.83; 0.91] | 0.1%            | 0.5%            |
| Hsu, et al 2005                  | 72     | 197   | 0.37       | [0.30; 0.44] | 0.1%            | 0.5%            |
| Ward, et al 2010                 | 601    | 1115  | 0.54       | [0.51; 0.57] | 0.5%            | 0.5%            |
| Pandey, et al 2020               | 97     | 189   | 0.51       | [0.44; 0.59] | 0.1%            | 0.5%            |
| Sievert, et al 2007              | 556    | 869   | 0.64       | [0.61; 0.67] | 0.4%            | 0.5%            |
| Sievert, et al 2003              | 420    | 755   | 0.56       | [0.52; 0.5   |                 |                 |

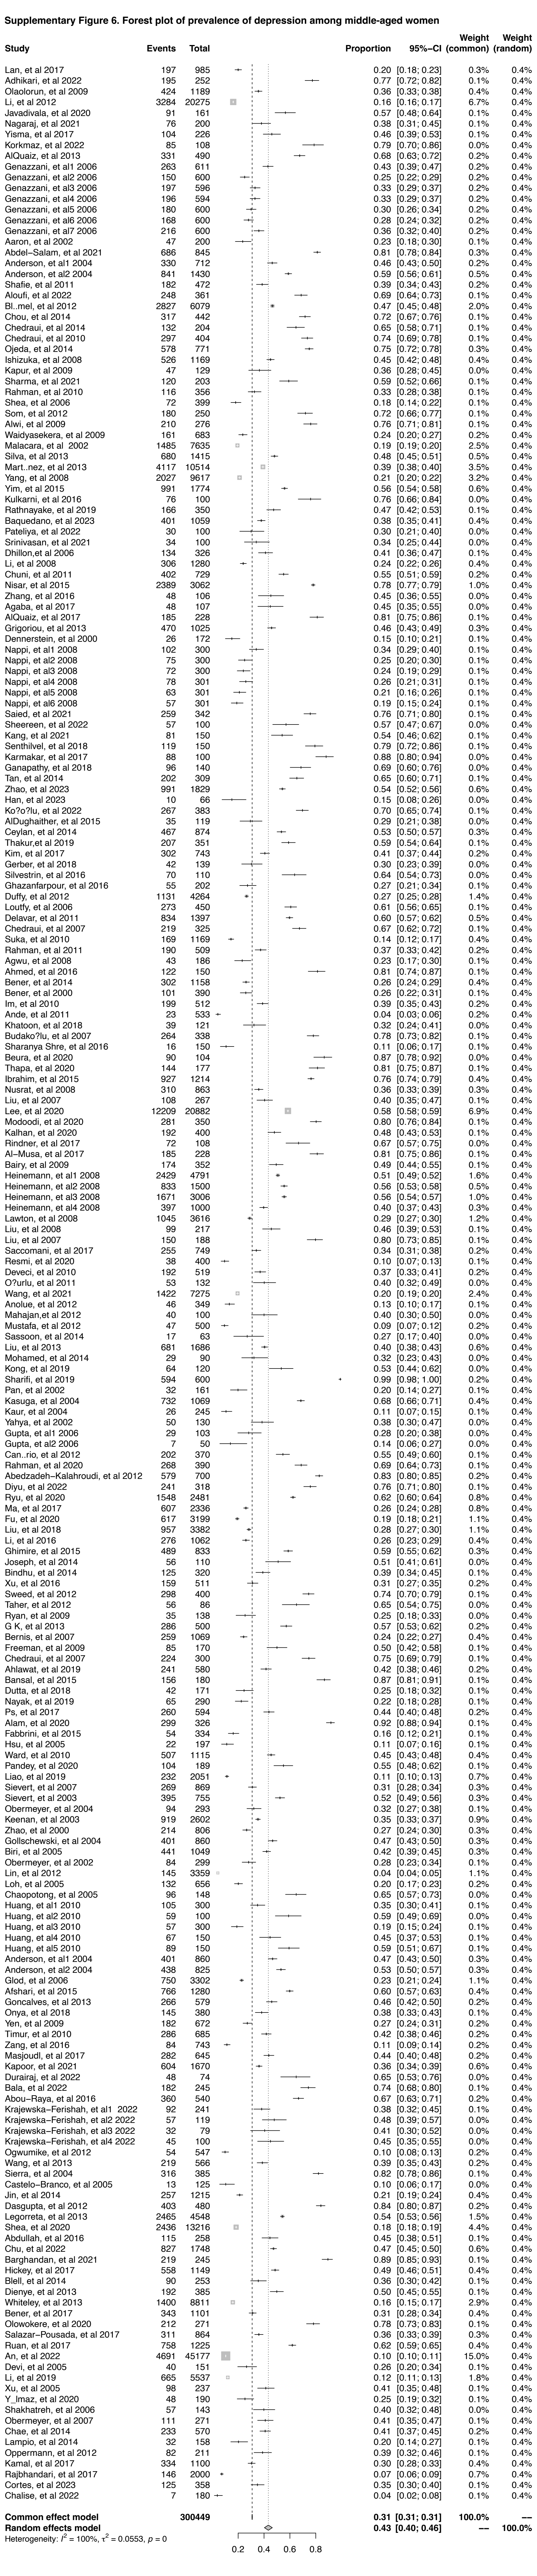

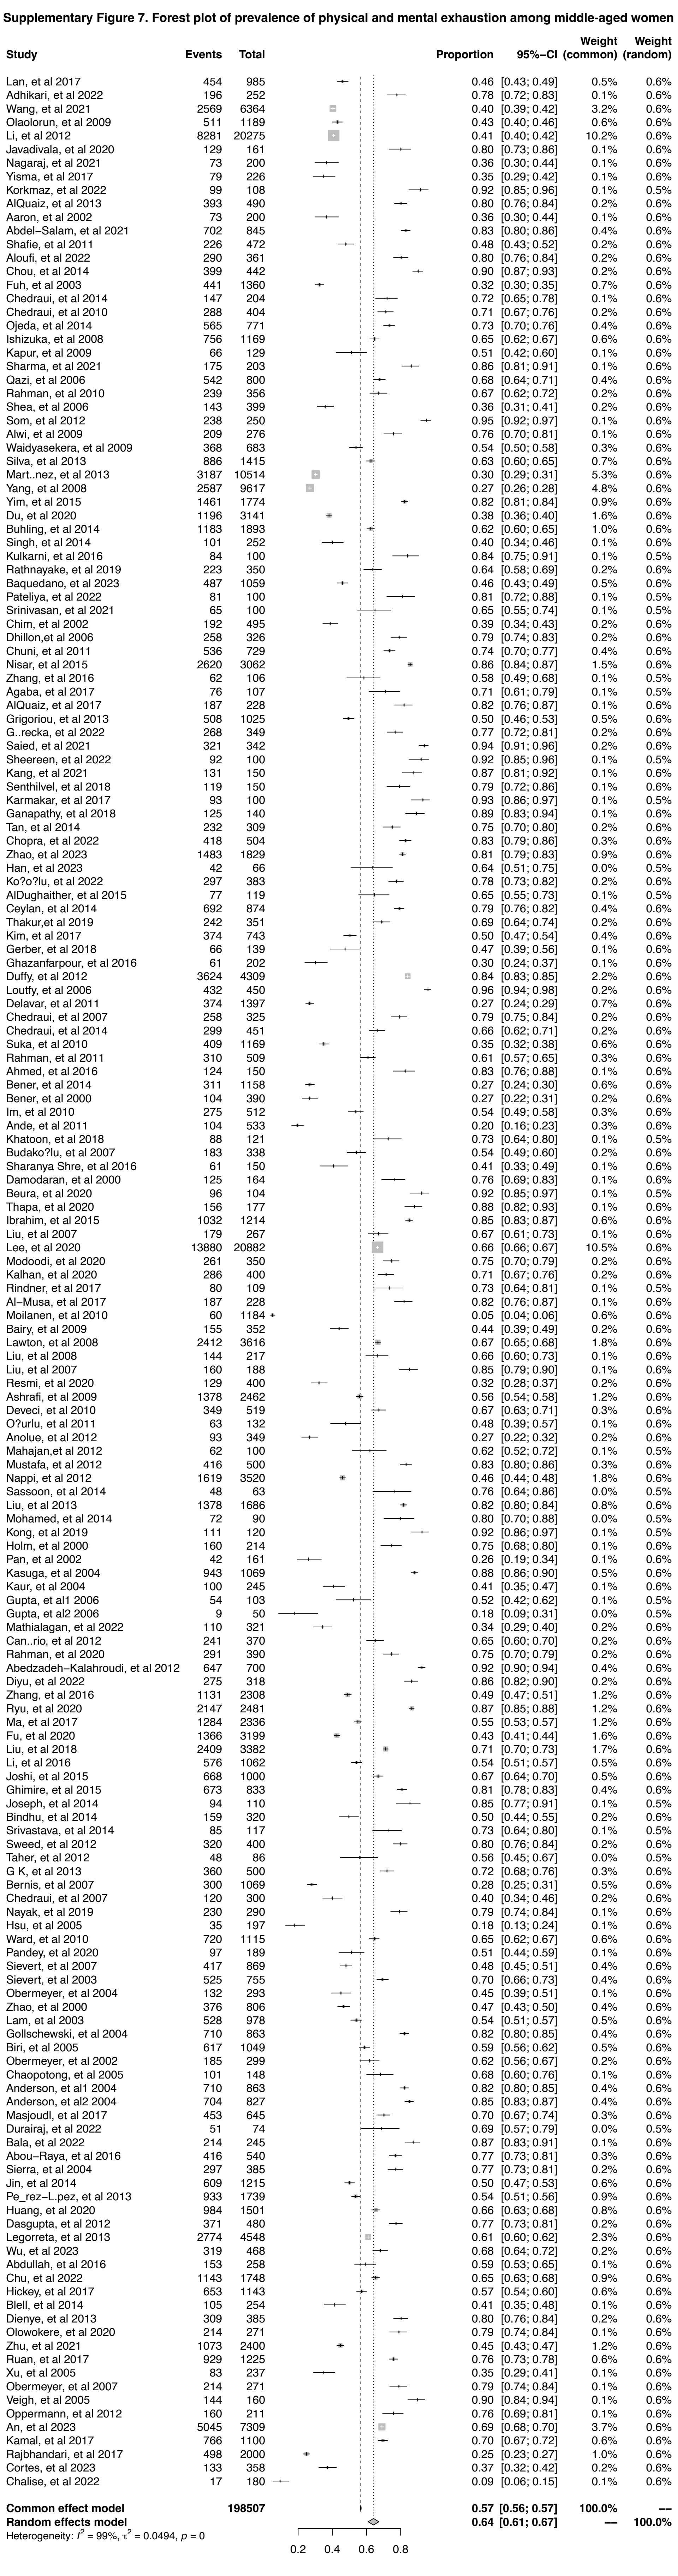

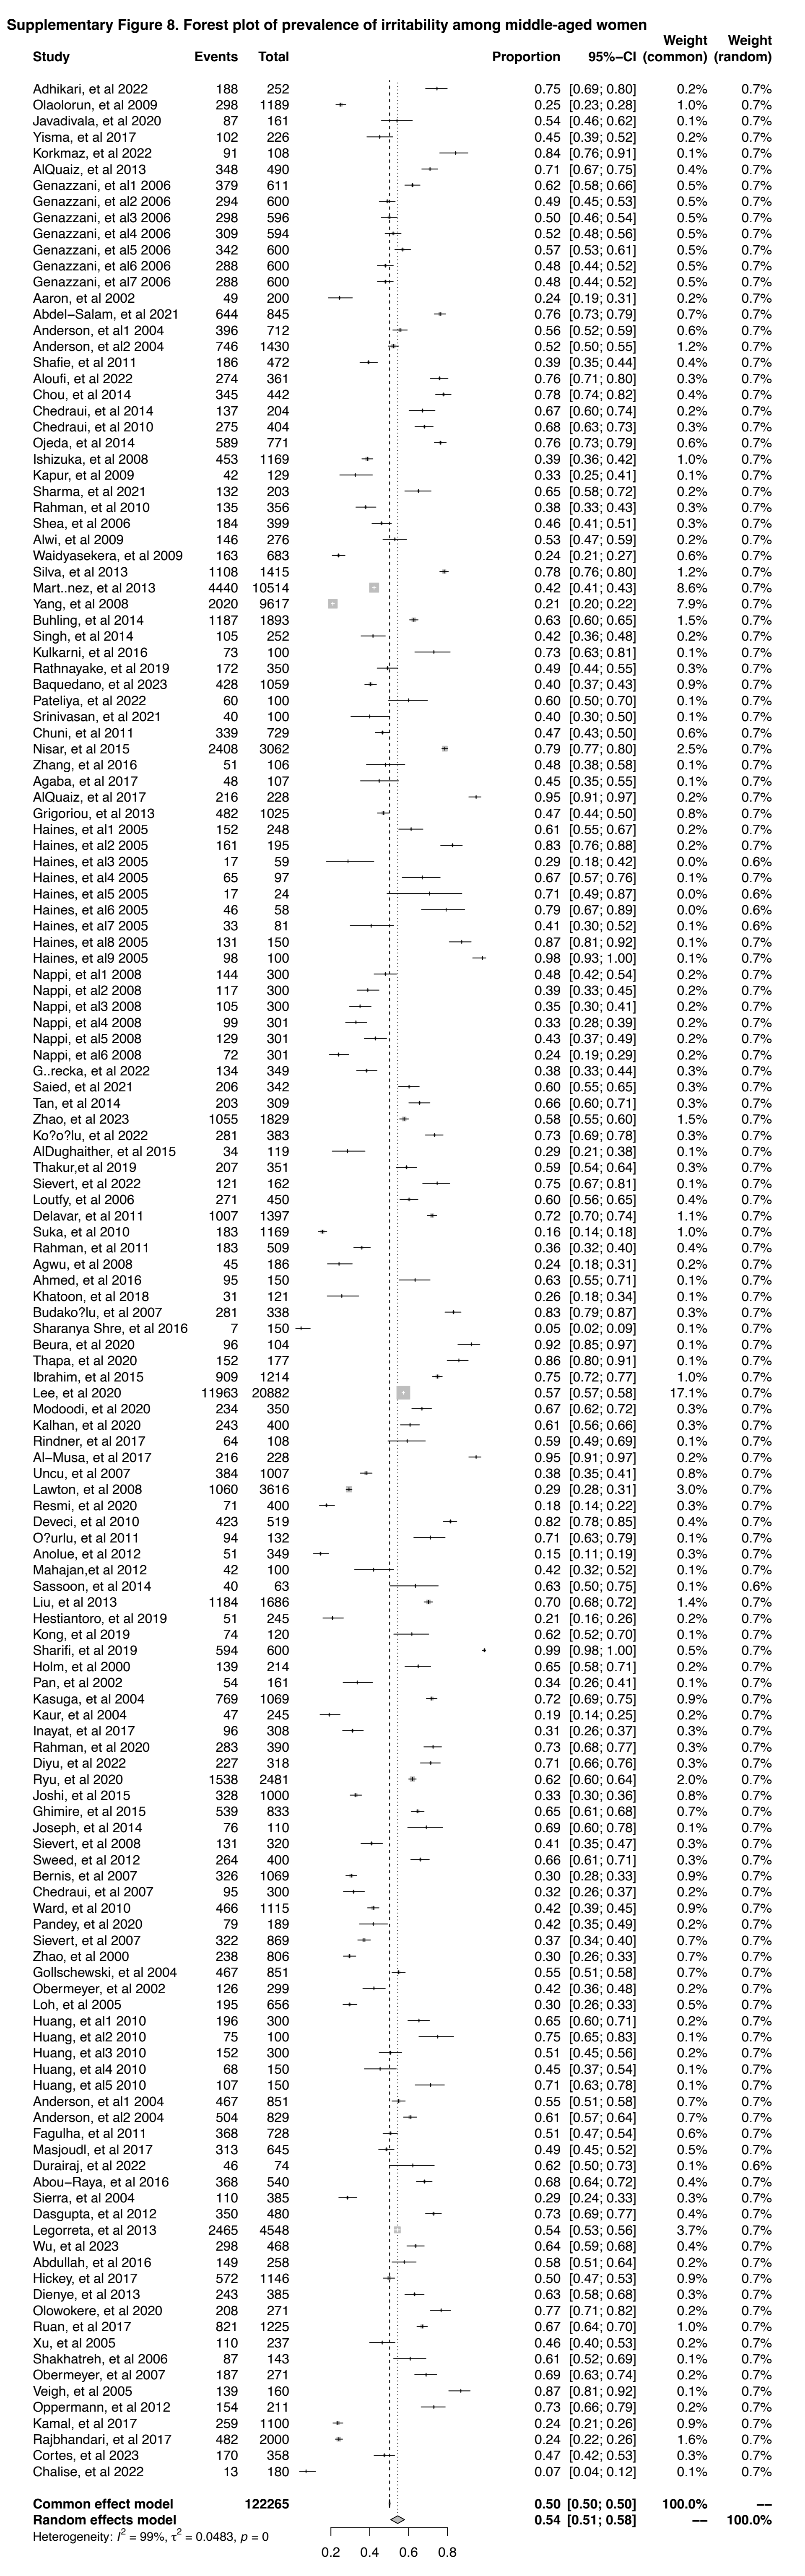

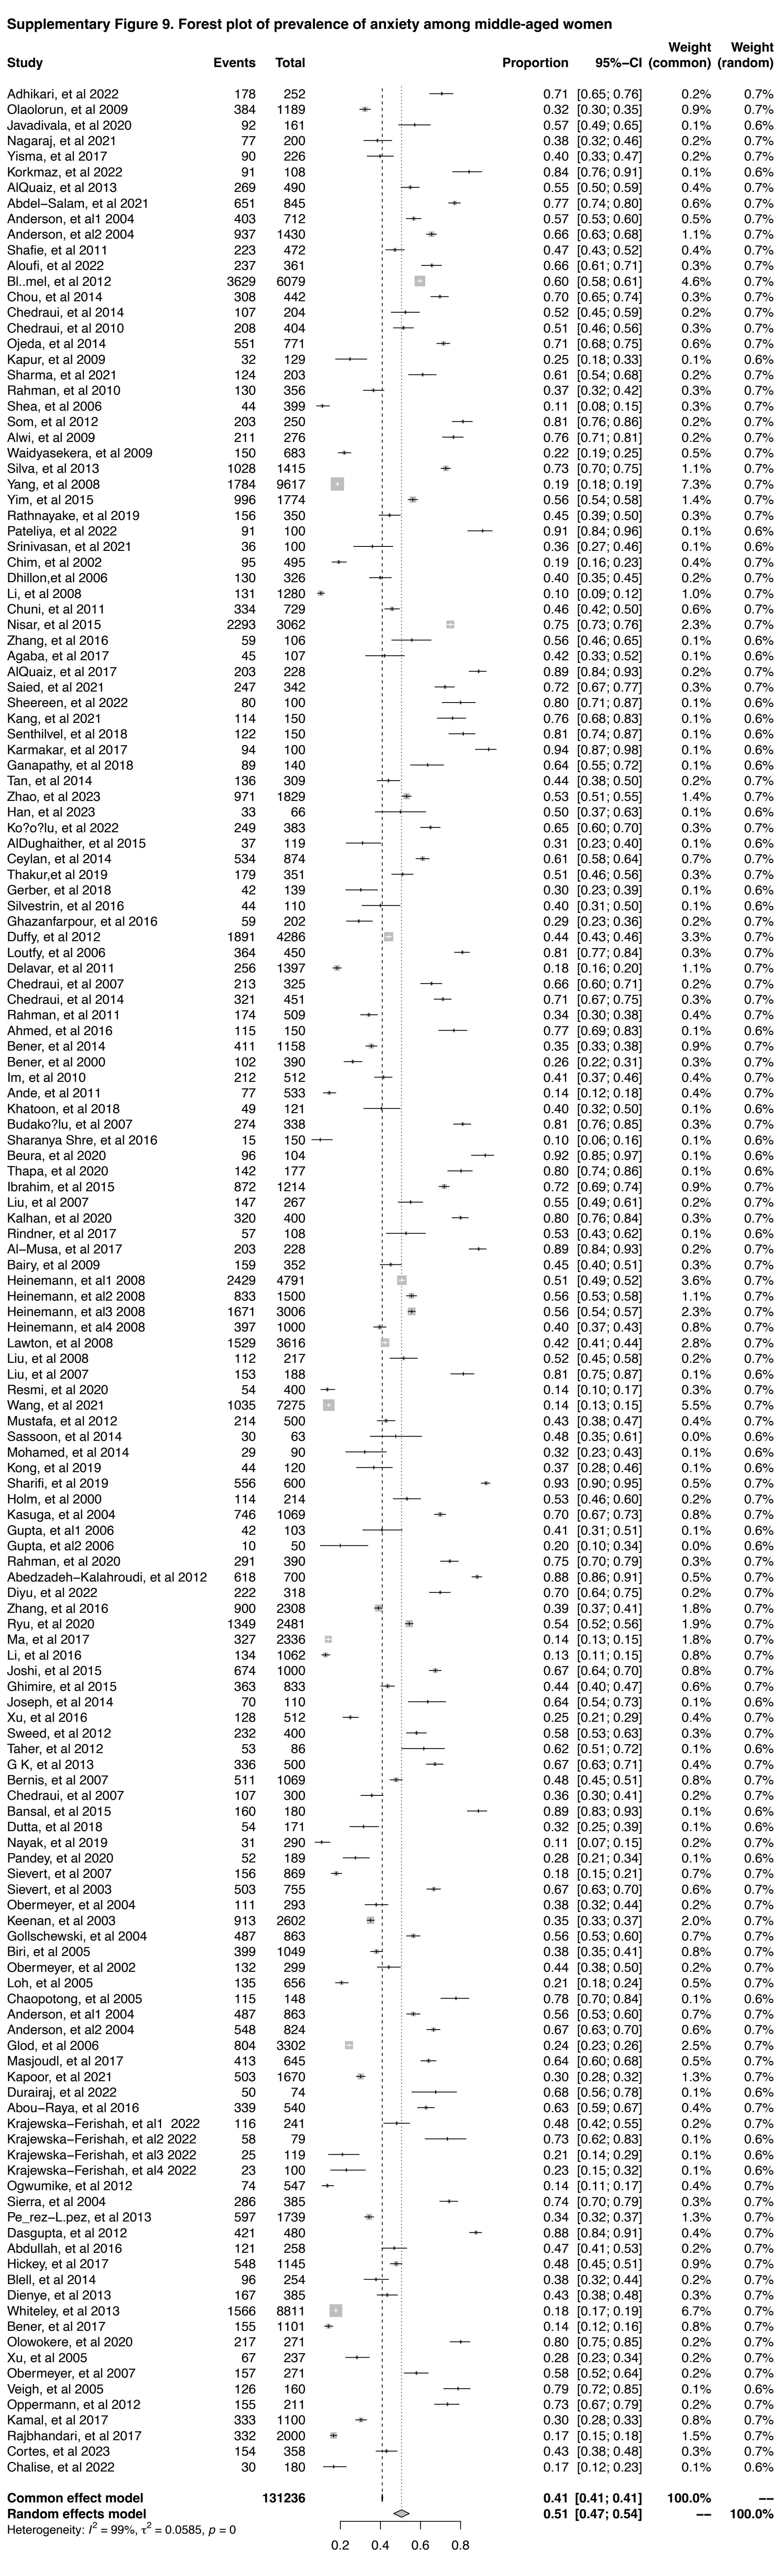

**Supplementary Figure 10. Forest plot of prevalence of mood swings among middle-aged women**

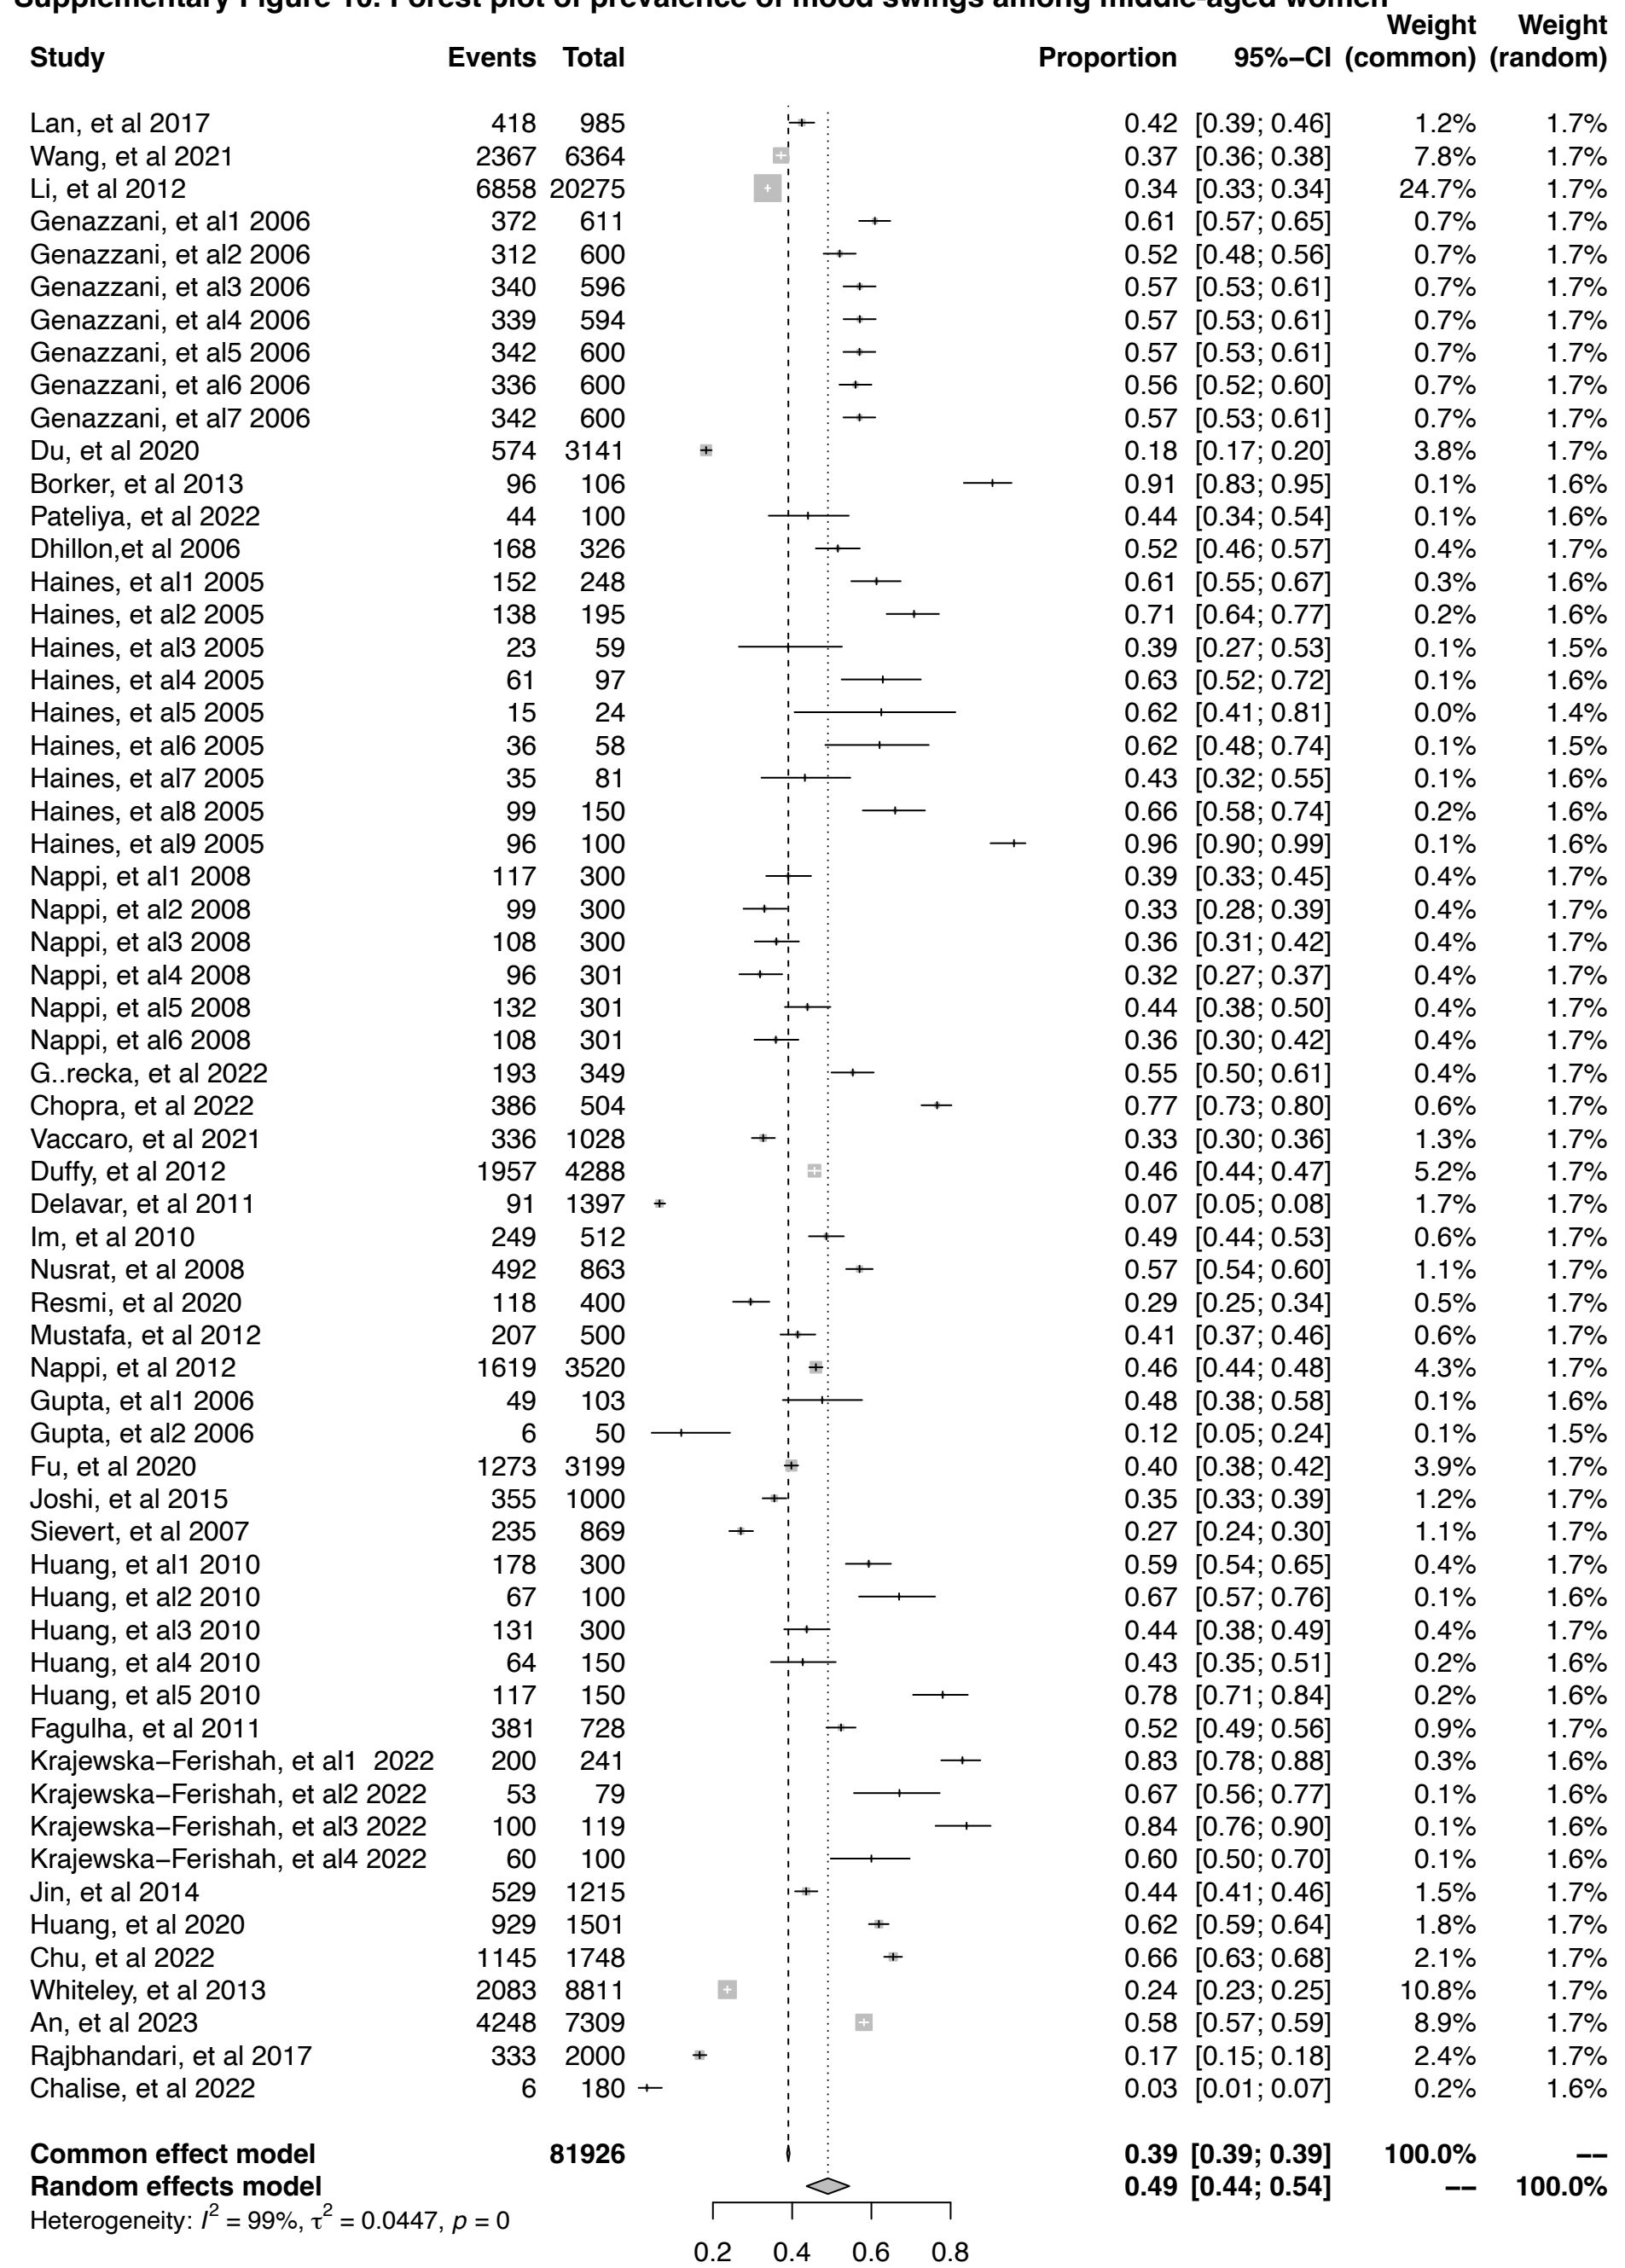

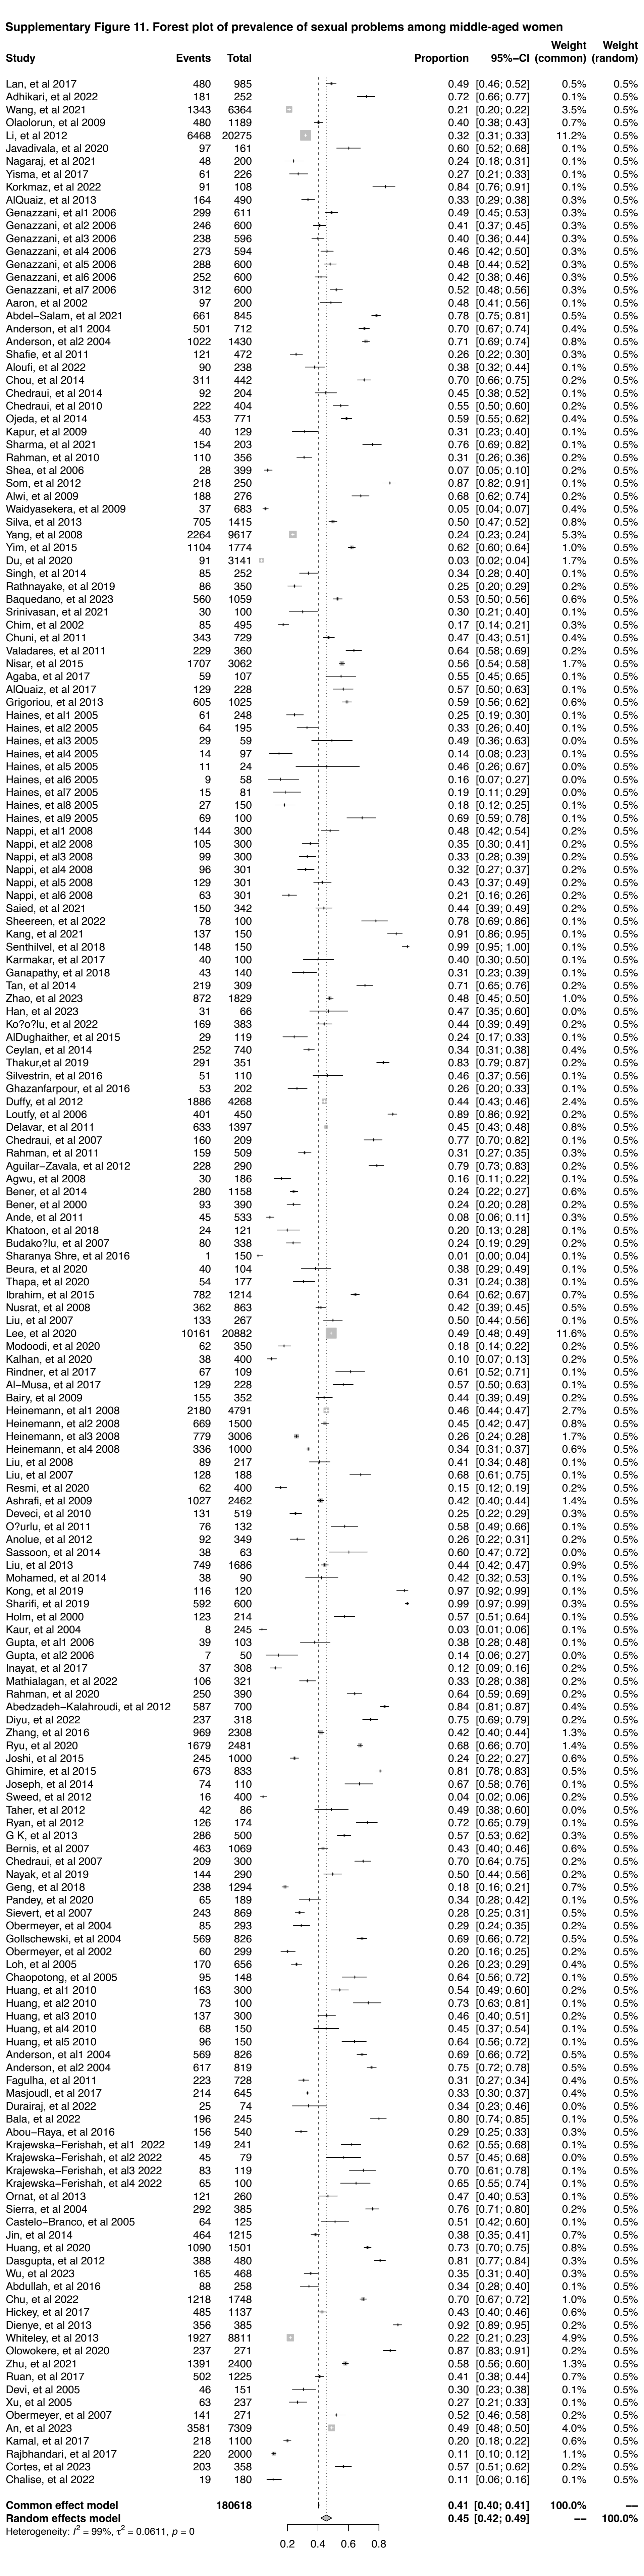



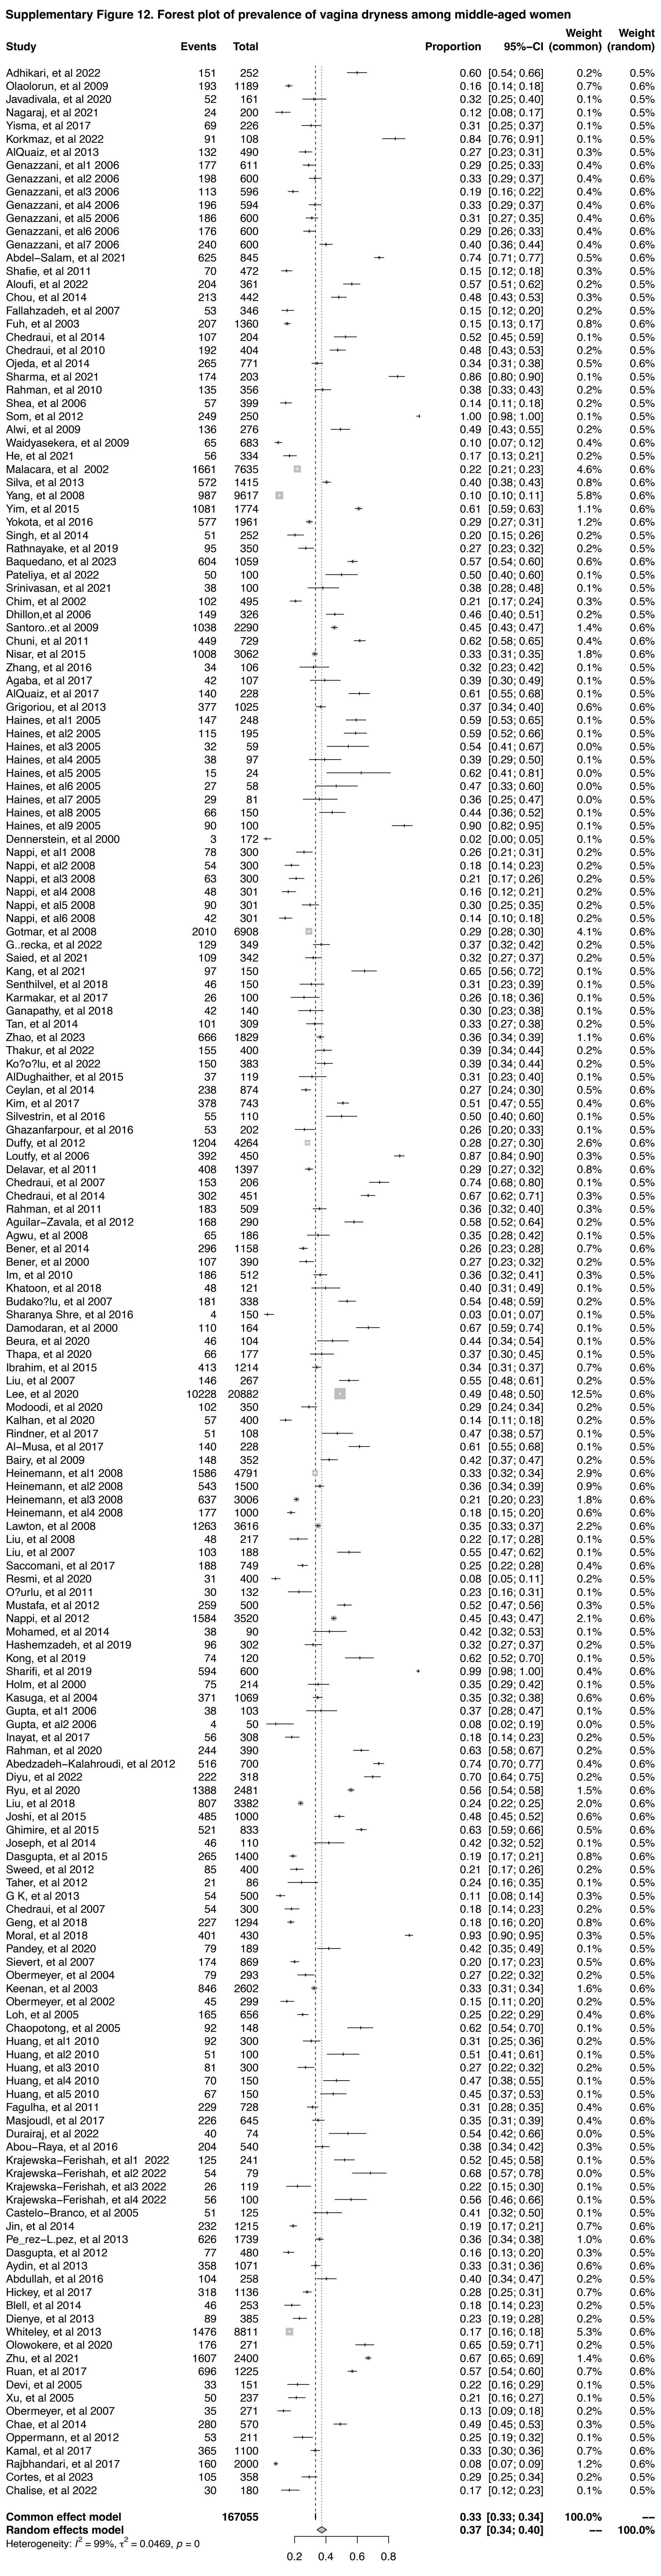

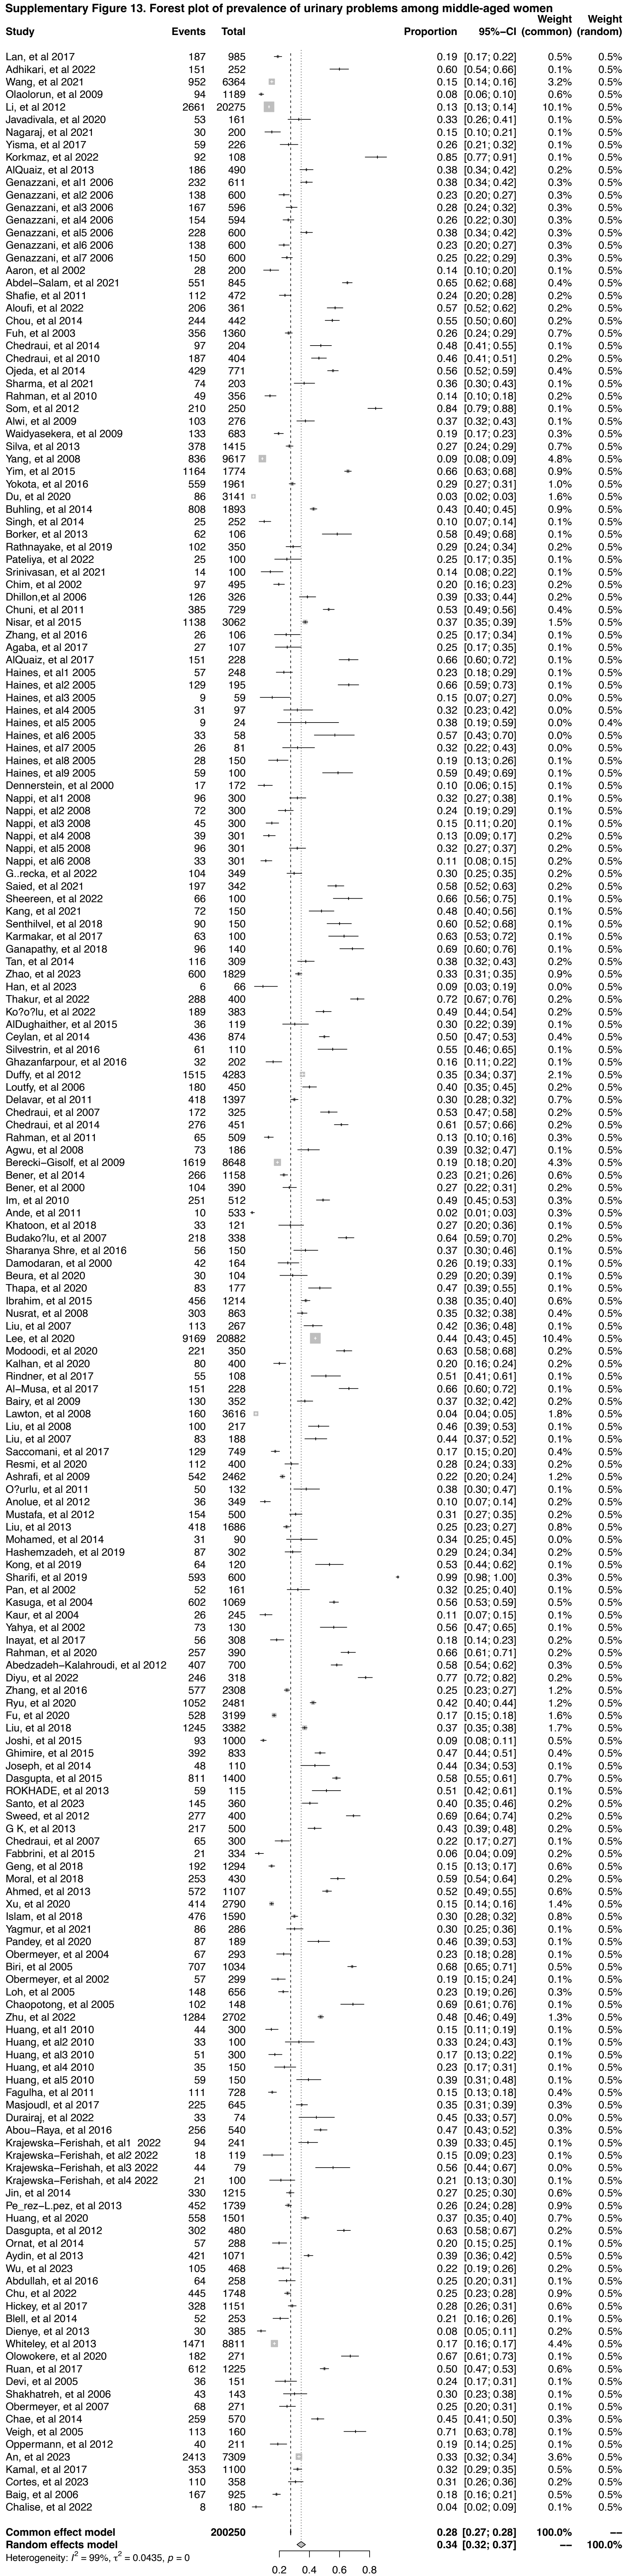

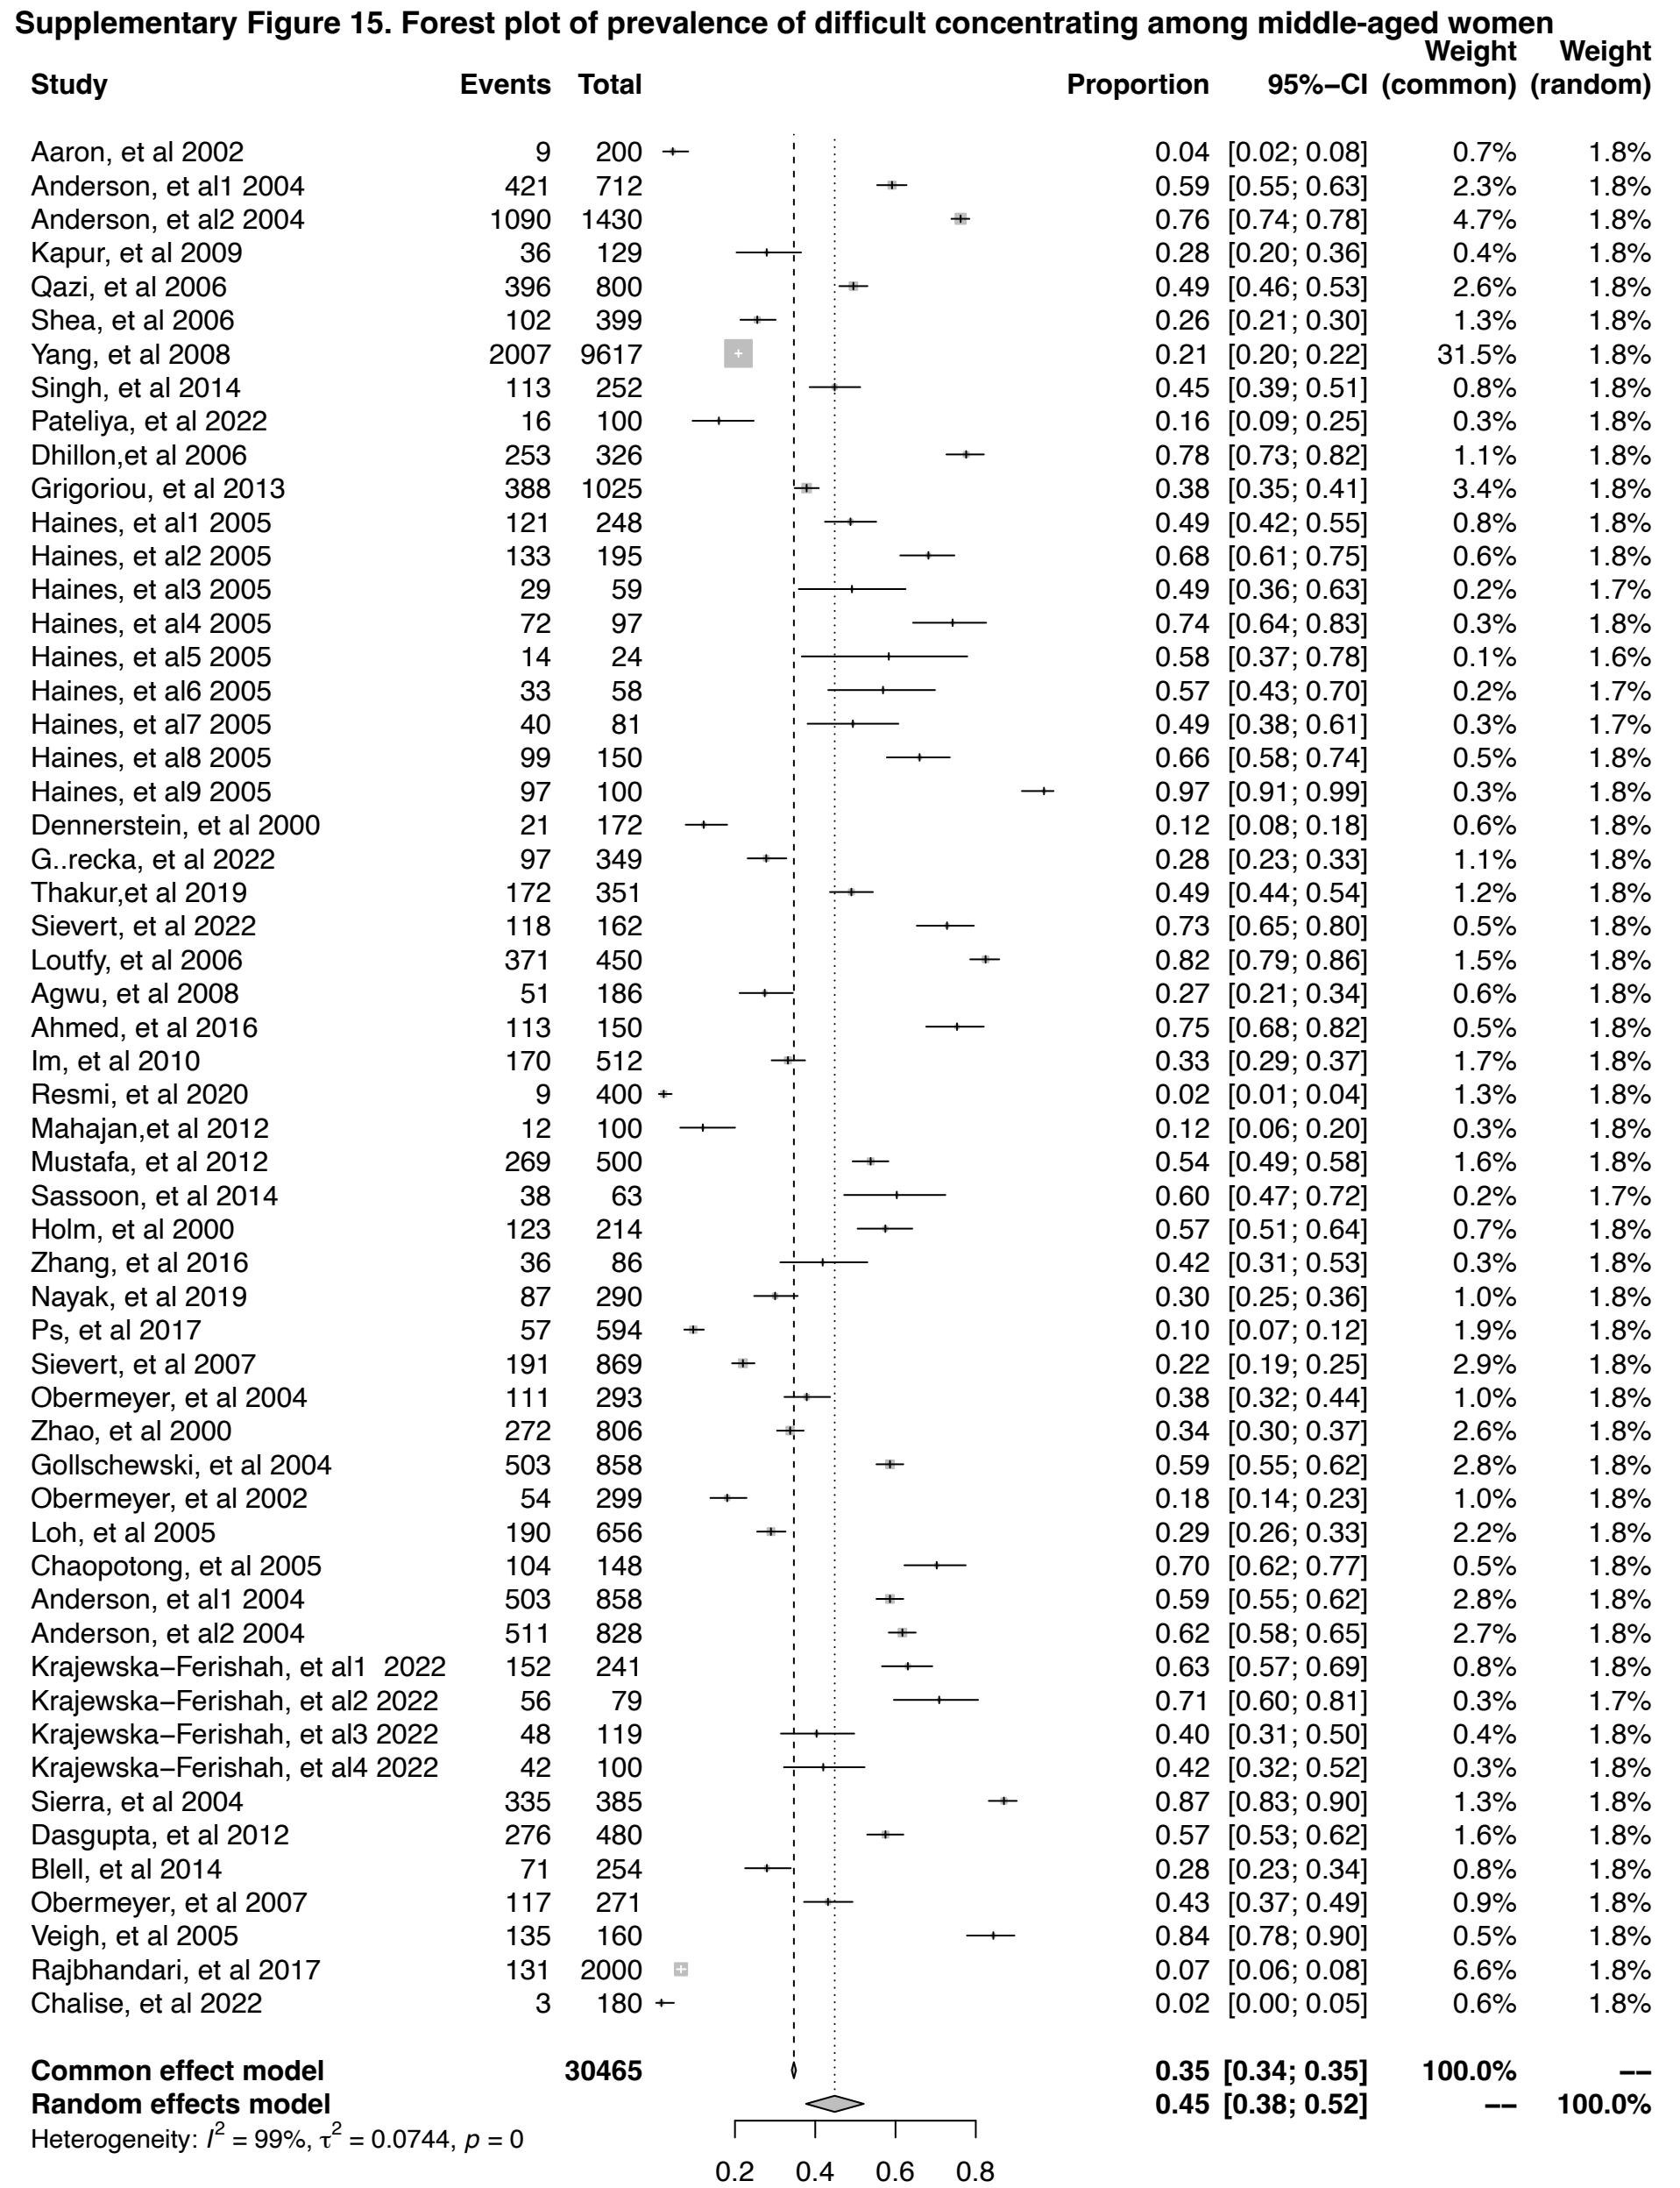

**Supplementary Figure 14. Forest plot of prevalence of forgetfulness among middle-aged women**

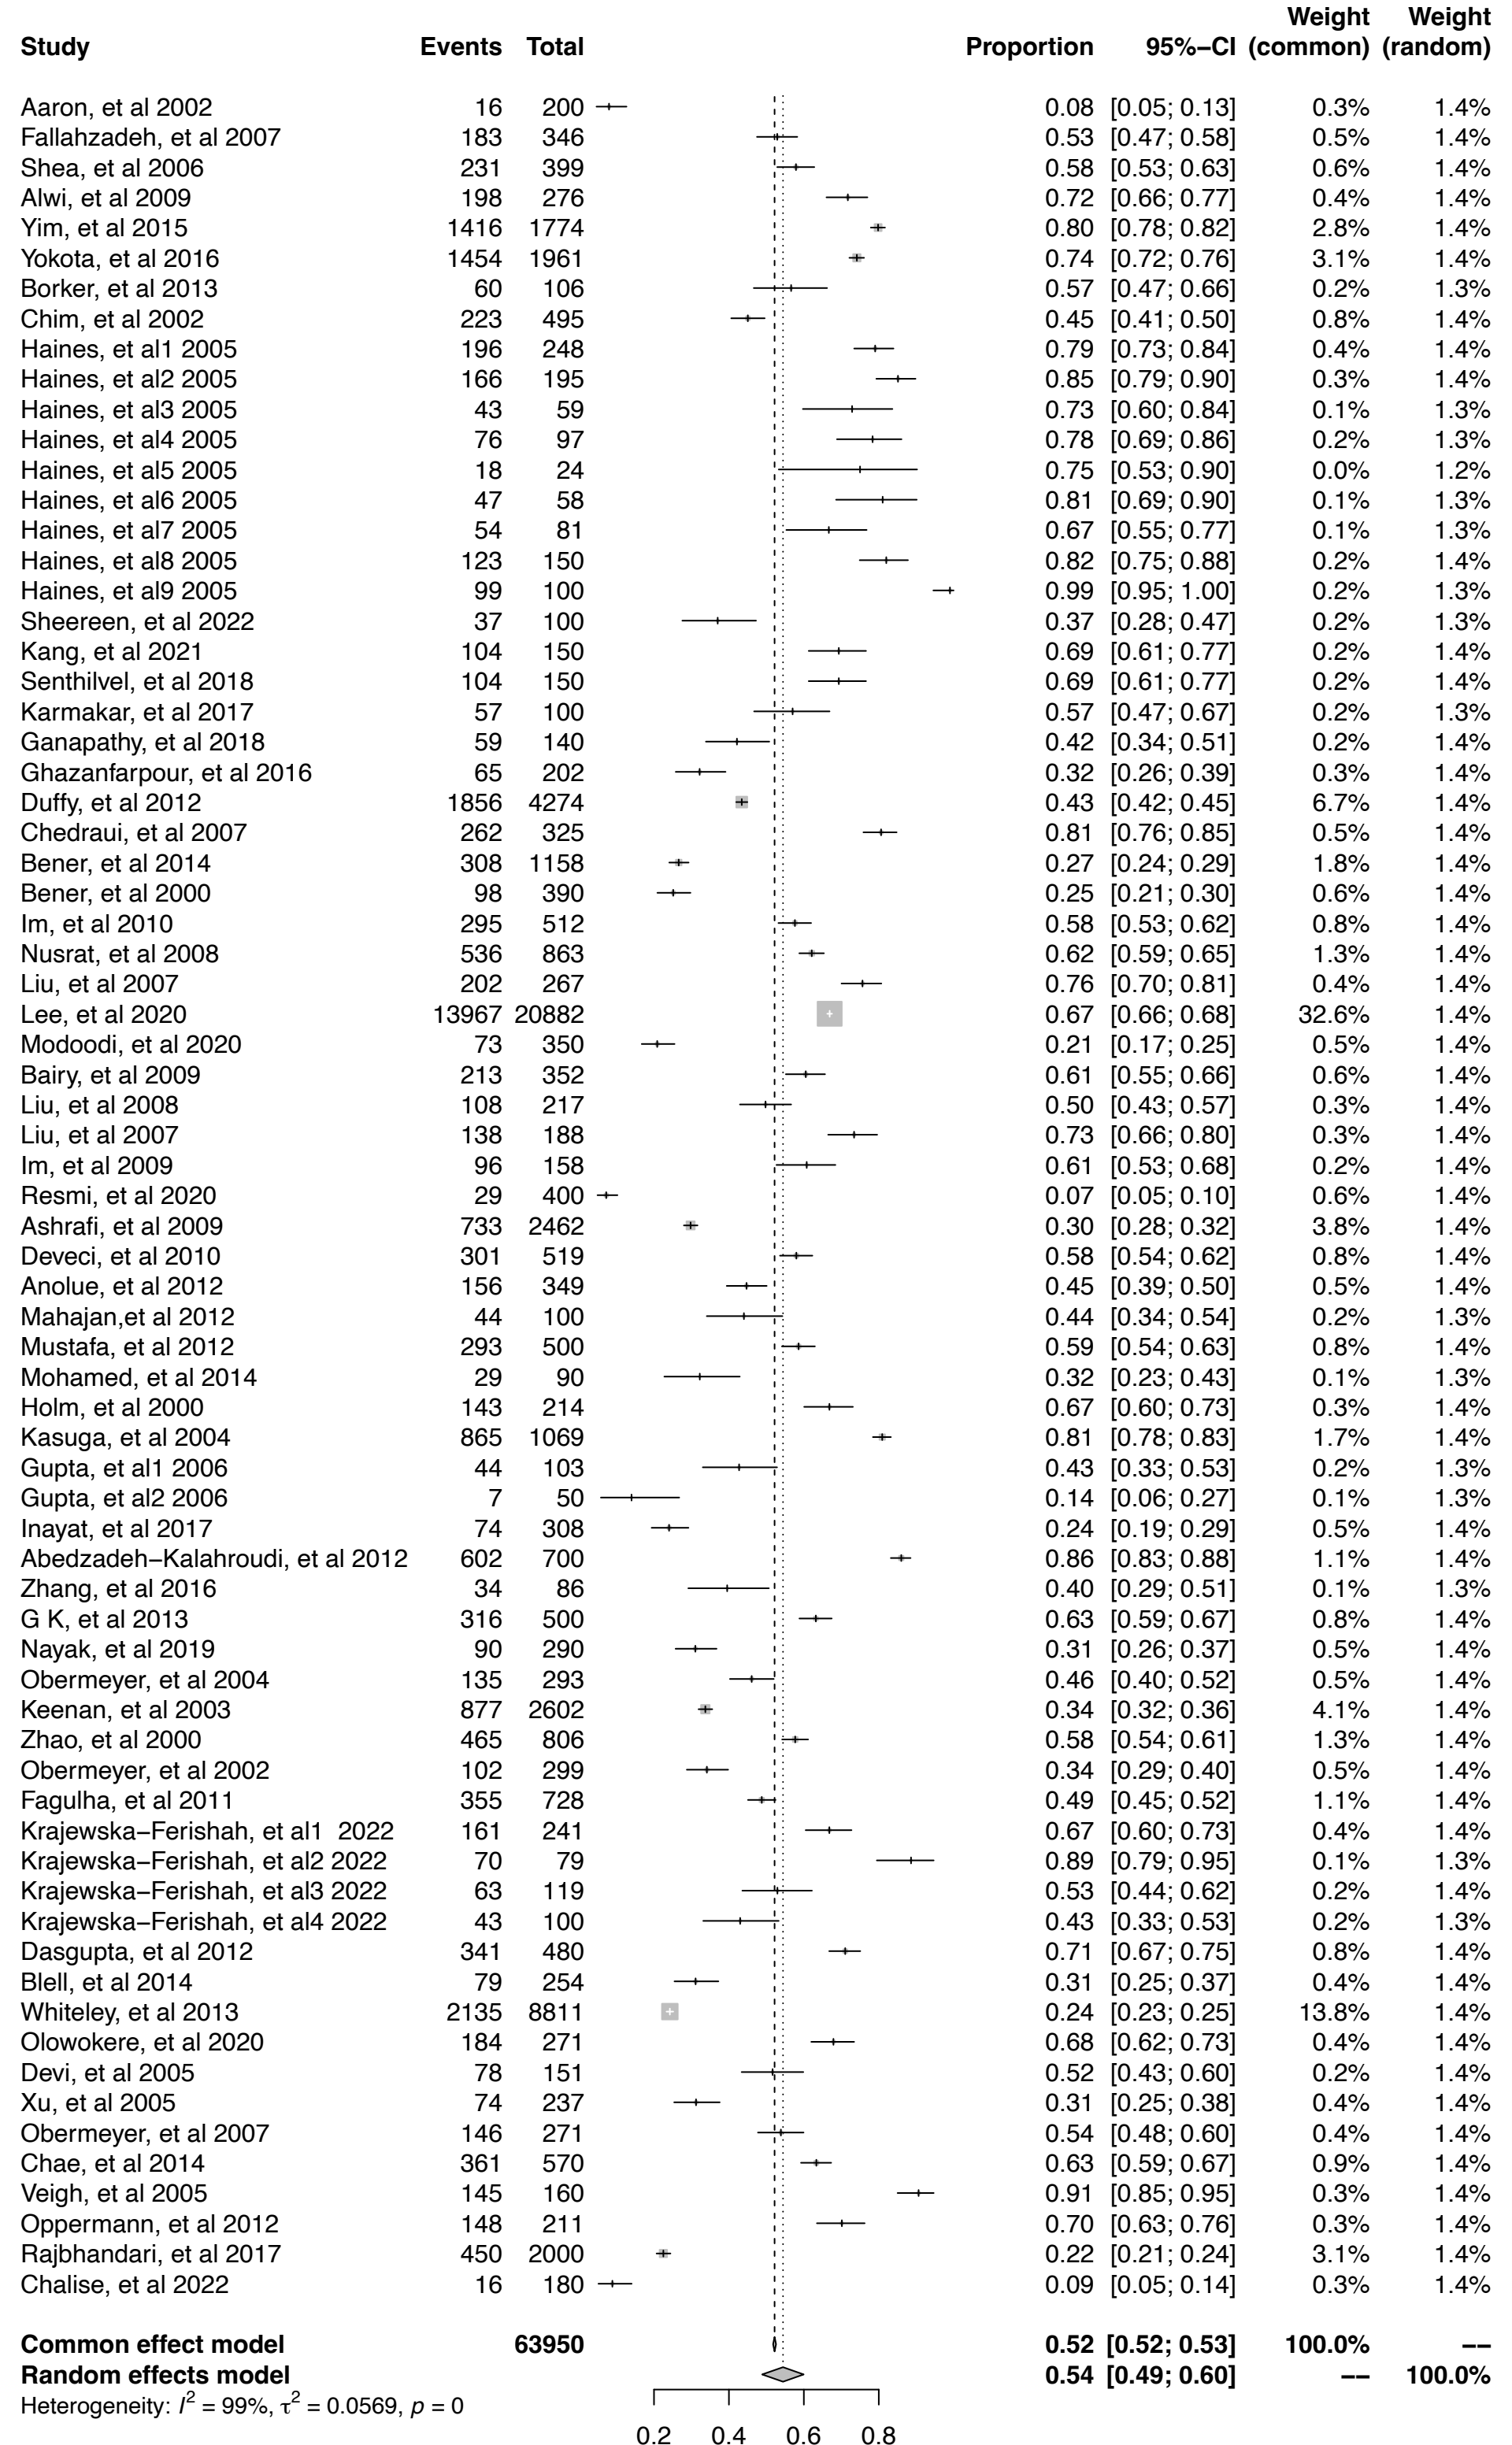

**Supplementary Figure 16. Forest plot of prevalence of fornication among middle-aged women**

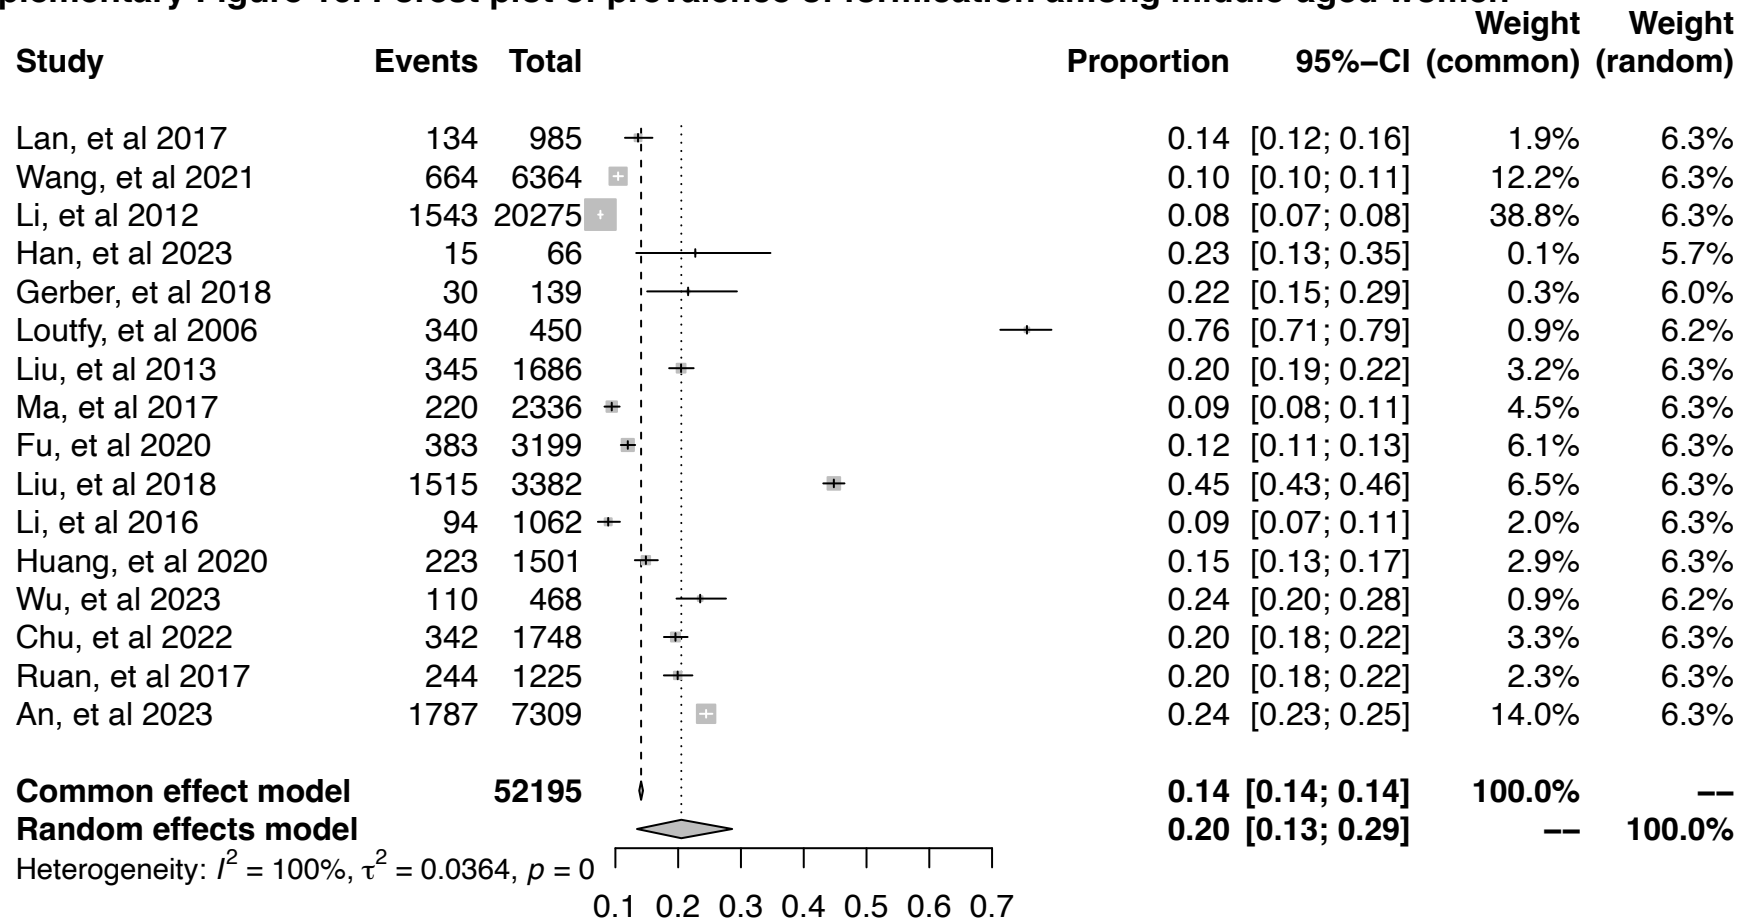

**Supplementary Figure 17. Forest plot of prevalence of change in the appearance, texture, or tone of skin among middle-aged women**

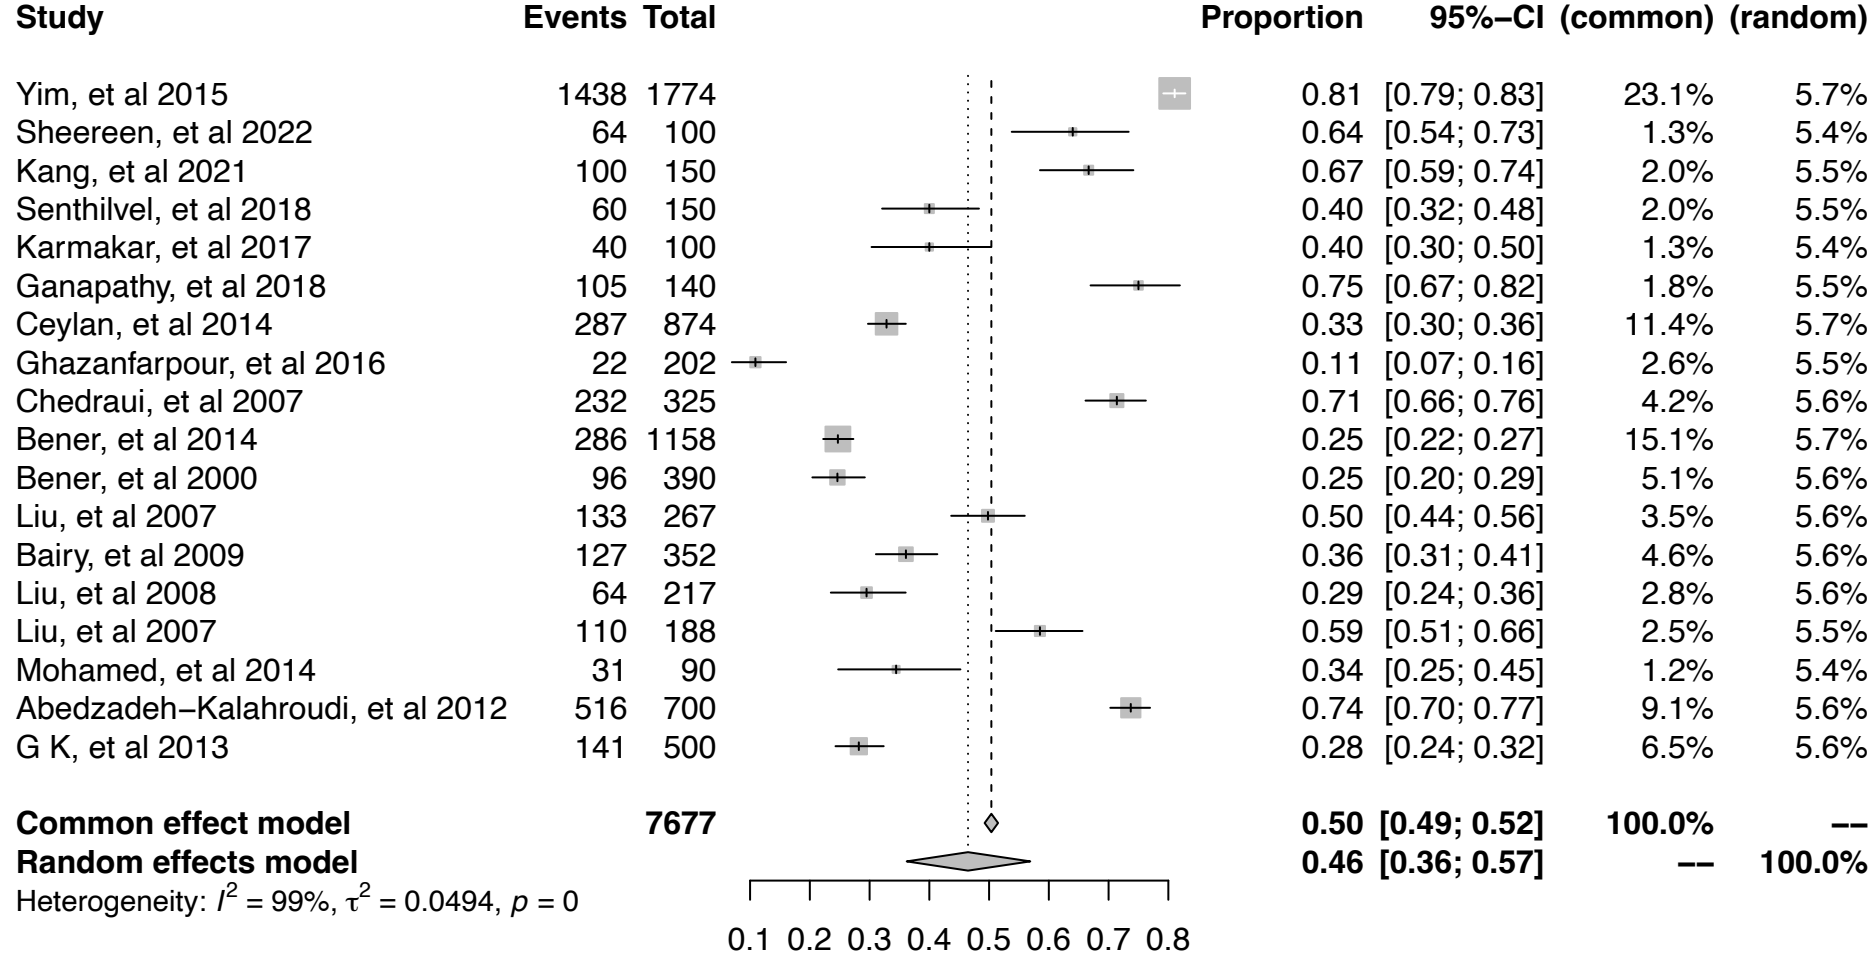

**Supplementary Figure 18. Forest plot of prevalence of increased facial hair among middle-aged women**

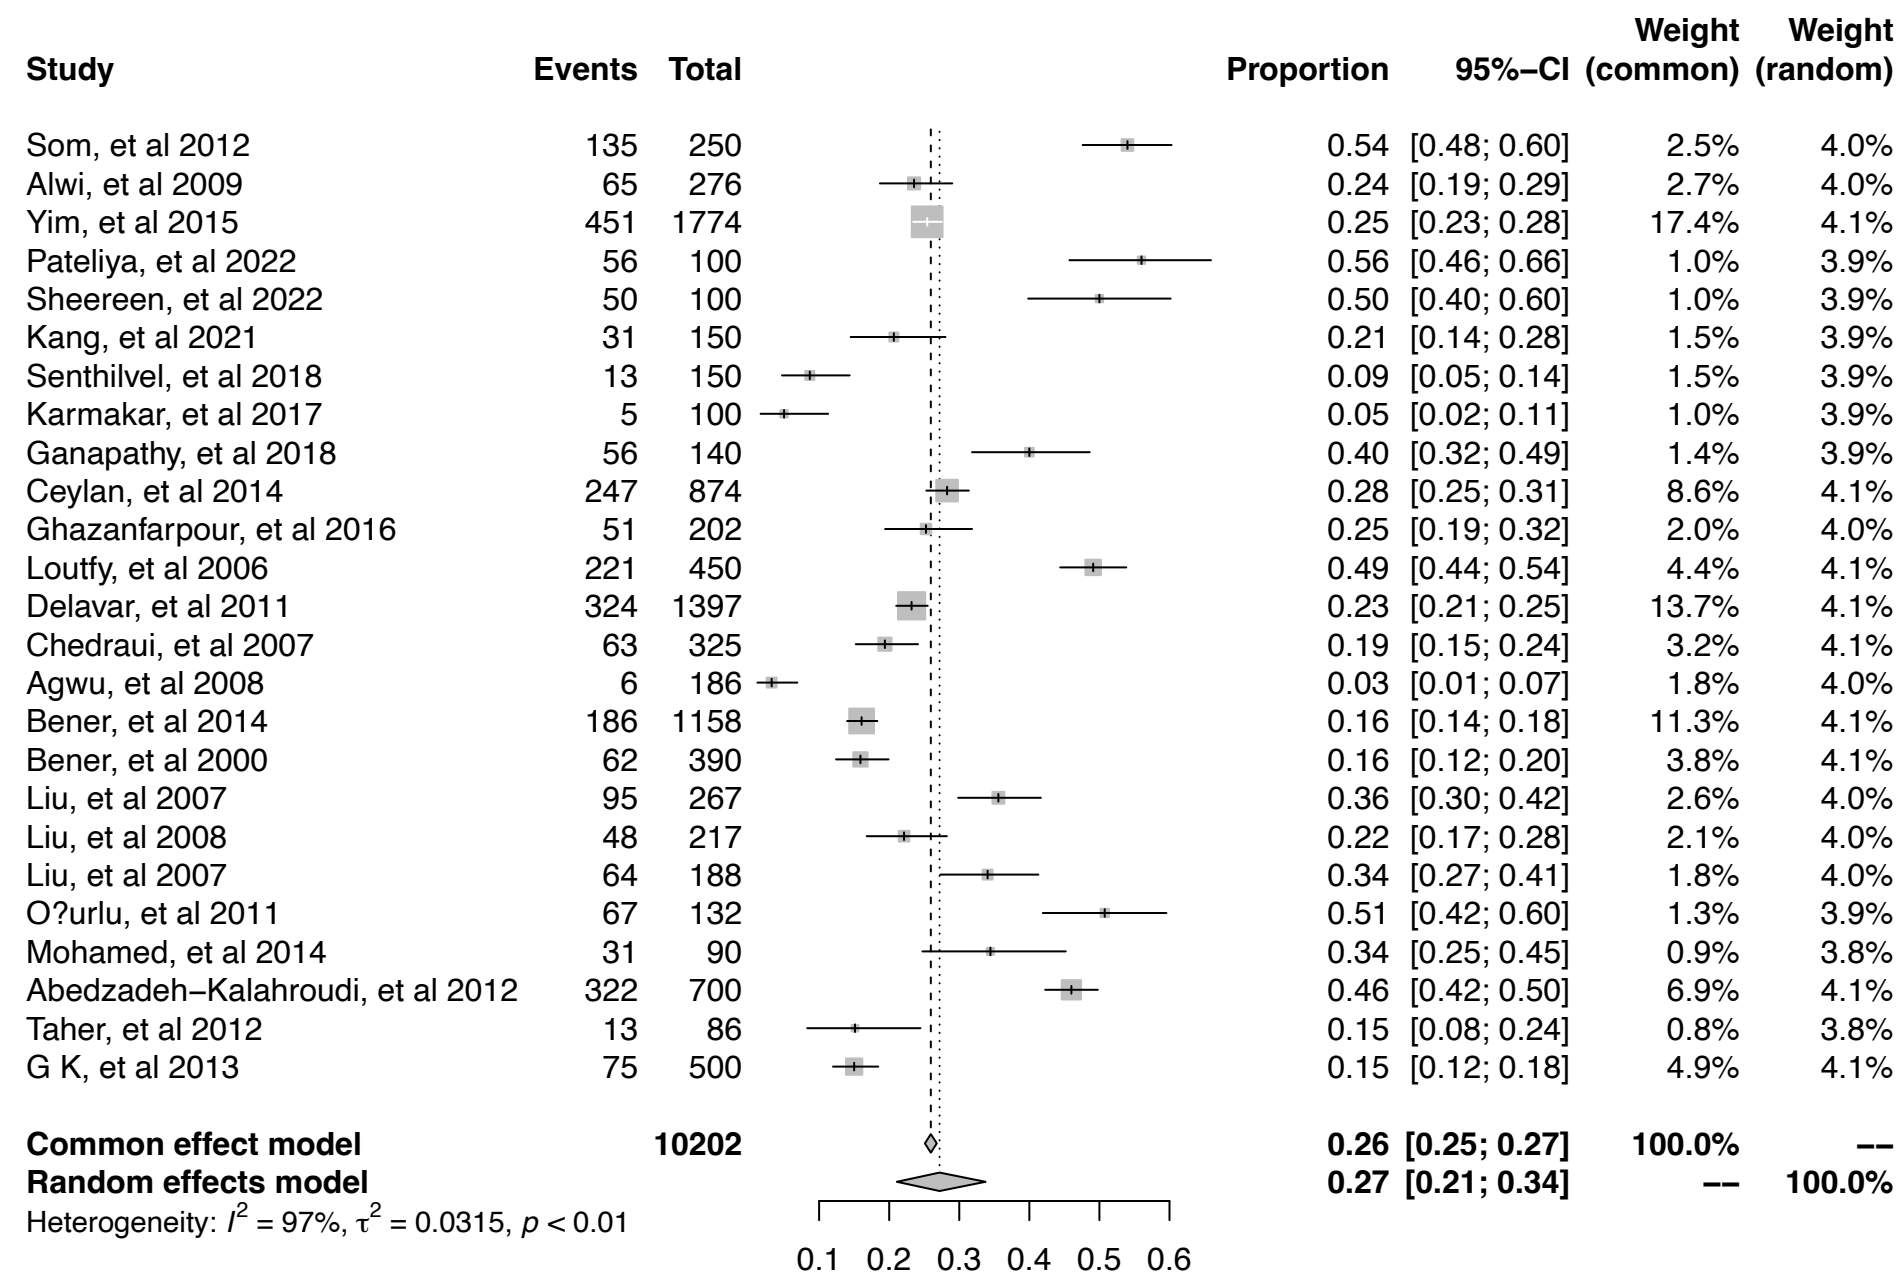

**Supplementary Figure 19. Forest plot of prevalence of drying skin among middle-aged women**

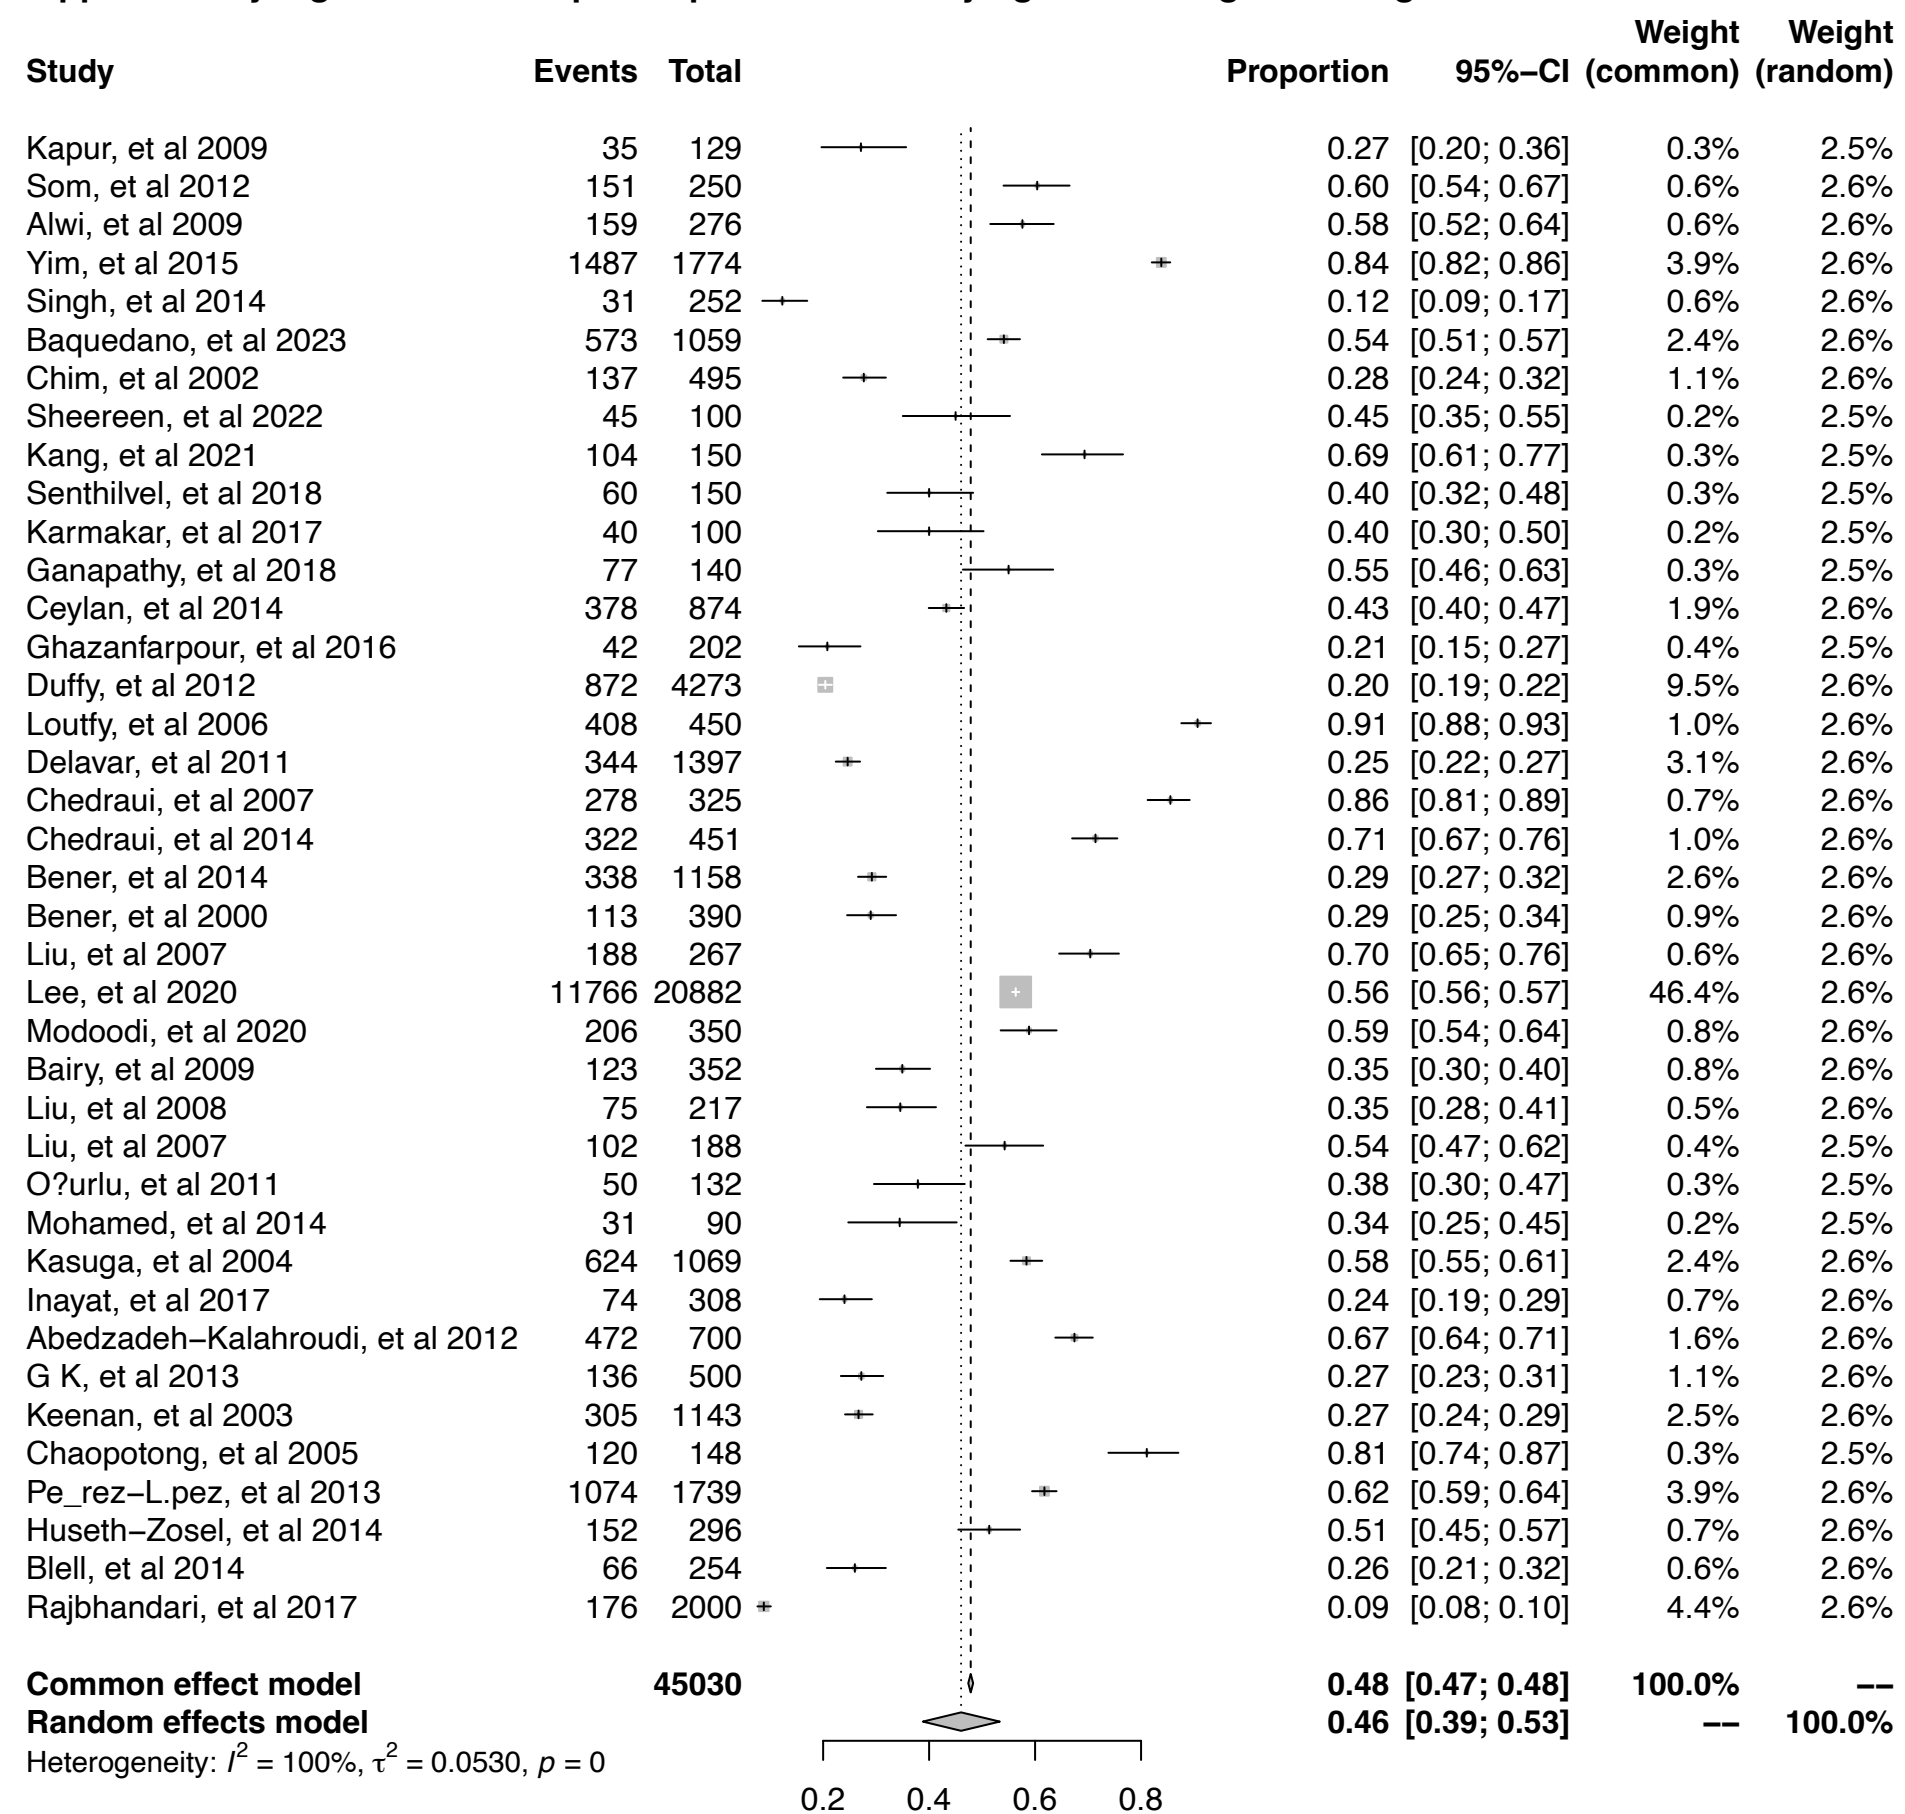



Supplementary Table 2. Subgroup analysis and risk factors for **Sleep problems**

| <b>Subgroup</b>          | <b>Studies</b> | <b>Event</b> | <b>Total</b> | <b>Prevalence (%)</b> | <b>95% CI (%)</b> | <b>P value</b>  |
|--------------------------|----------------|--------------|--------------|-----------------------|-------------------|-----------------|
| <b>Country</b>           |                |              |              |                       |                   | <b>&lt;0.01</b> |
| China                    | 32             | 38652        | 82789        | 49.65                 | 44.69-54.61       |                 |
| Nepal                    | 7              | 1802         | 4386         | 48.38                 | 28.58-68.46       |                 |
| Nigeria                  | 8              | 1189         | 3567         | 37.66                 | 22.51-54.15       |                 |
| Iran                     | 10             | 3954         | 7563         | 60.32                 | 44.09-75.47       |                 |
| India                    | 31             | 3641         | 7822         | 50.46                 | 42.88-58.03       |                 |
| Ethiopia                 | 1              | 112          | 226          | 49.56                 | 43.04-56.08       |                 |
| Turkey                   | 9              | 3264         | 5263         | 60.99                 | 51.49-70.08       |                 |
| Saudi                    | 8              | 1858         | 2771         | 64.2                  | 47.97-78.92       |                 |
| UK                       | 6              | 3914         | 6676         | 53.9                  | 43.52-64.12       |                 |
| France                   | 2              | 459          | 900          | 51                    | 47.73-54.27       |                 |
| Germany                  | 3              | 1778         | 2789         | 57.19                 | 42.45-71.3        |                 |
| Belgium                  | 1              | 309          | 594          | 52.02                 | 48-56.03          |                 |
| Netherlands              | 2              | 495          | 901          | 52.6                  | 37.8-67.17        |                 |
| Switzerland              | 2              | 435          | 901          | 43.82                 | 19.91-69.36       |                 |
| Spain                    | 6              | 6368         | 13888        | 47.9                  | 38.51-57.36       |                 |
| Australia                | 12             | 6972         | 13797        | 57.53                 | 45.2-69.41        |                 |
| Japan                    | 5              | 2450         | 5664         | 43.53                 | 28.14-59.6        |                 |
| Oman                     | 1              | 207          | 472          | 43.86                 | 39.4-48.36        |                 |
| Multi                    | 5              | 12721        | 21197        | 59.82                 | 51.48-67.88       |                 |
| Macau, China             | 1              | 341          | 442          | 77.15                 | 73.11-80.95       |                 |
| Taiwan                   | 6              | 13479        | 22981        | 52.08                 | 44.88-59.23       |                 |
| Ecuador                  | 7              | 1263         | 2409         | 51.54                 | 44.03-59.01       |                 |
| Peru                     | 1              | 558          | 771          | 72.37                 | 69.16-75.48       |                 |
| Pakistan                 | 7              | 3806         | 5959         | 49.23                 | 33.76-64.77       |                 |
| Malaysia                 | 8              | 878          | 1825         | 48.32                 | 39.73-56.97       |                 |
| Sri Lanka                | 2              | 391          | 1033         | 38.97                 | 30.89-47.36       |                 |
| Brazil                   | 3              | 1071         | 1996         | 49.75                 | 40.36-59.14       |                 |
| Korea                    | 7              | 12614        | 55672        | 37.66                 | 24.12-52.26       |                 |
| Singapore                | 3              | 764          | 2245         | 32.15                 | 23.6-41.35        |                 |
| Greece                   | 1              | 413          | 1025         | 40.29                 | 37.31-43.31       |                 |
| the Philippines          | 1              | 153          | 195          | 78.46                 | 72.4-83.97        |                 |
| Republic of<br>Indonesia | 4              | 871          | 1622         | 55.54                 | 29.89-79.73       |                 |
| Thailand                 | 3              | 290          | 448          | 64.93                 | 53.56-75.52       |                 |
| Vietnam                  | 1              | 92           | 100          | 92                    | 85.76-96.64       |                 |
| Italy                    | 3              | 662          | 1663         | 40.98                 | 33.77-48.39       |                 |
| Poland                   | 1              | 216          | 349          | 61.89                 | 56.73-66.92       |                 |
| Iraq                     | 2              | 457          | 842          | 56.15                 | 37.05-74.36       |                 |
| USA                      | 10             | 5849         | 15283        | 50.3                  | 42.61-57.99       |                 |
| Egypt                    | 5              | 2165         | 3704         | 62.88                 | 38.87-83.93       |                 |
| Bangladesh               | 4              | 772          | 1375         | 56.12                 | 35.65-75.57       |                 |

|                           |     |        |        |       |             |             |
|---------------------------|-----|--------|--------|-------|-------------|-------------|
| Qatar                     | 1   | 335    | 1158   | 28.93 | 26.35-31.58 |             |
| United Arab Emirates      | 1   | 120    | 390    | 30.77 | 26.28-35.45 |             |
| Cambodia                  | 1   | 146    | 177    | 82.49 | 76.51-87.76 |             |
| Sweden                    | 1   | 72     | 108    | 66.67 | 57.46-75.28 |             |
| New Zealand               | 1   | 1962   | 3616   | 54.26 | 52.63-55.88 |             |
| South Africa              | 1   | 35     | 63     | 55.56 | 43.1-67.68  |             |
| Libya                     | 1   | 47     | 86     | 54.65 | 44.01-65.08 |             |
| Hong Kong                 | 2   | 199    | 455    | 53.15 | 6.9-95.99   |             |
| Mexico                    | 2   | 2819   | 5303   | 53.16 | 51.82-54.5  |             |
| Morocco                   | 1   | 93     | 299    | 31.1  | 25.97-36.48 |             |
| Portugal                  | 1   | 345    | 728    | 47.39 | 43.77-51.02 |             |
| Colombia                  | 1   | 1107   | 1739   | 63.66 | 61.38-65.9  |             |
| Lebanon                   | 1   | 141    | 271    | 52.03 | 46.06-57.97 |             |
| Finland                   | 1   | 52     | 158    | 32.91 | 25.78-40.46 |             |
| <b>Continent</b>          |     |        |        |       |             | <b>0.89</b> |
| Asia                      | 158 | 91677  | 213920 | 51.97 | 48.84-55.1  |             |
| Africa                    | 17  | 3641   | 7945   | 47.4  | 35.92-59.01 |             |
| Europe                    | 32  | 21401  | 39272  | 51.25 | 47.01-55.48 |             |
| Oceania                   | 13  | 8934   | 17413  | 57.27 | 45.94-68.24 |             |
| South America             | 13  | 7439   | 12994  | 54.2  | 48.48-59.86 |             |
| North America             | 12  | 8668   | 20586  | 50.71 | 44.35-57.06 |             |
| Multi                     | 2   | 3398   | 6526   | 51.92 | 47.8-56.03  |             |
| <b>Income level</b>       |     |        |        |       |             | <b>0.66</b> |
| Upper-Middle-Income       | 72  | 52279  | 106982 | 53.09 | 49.93-56.24 |             |
| Lower-Middle-Income       | 83  | 19216  | 38073  | 52.27 | 47.15-57.37 |             |
| Low-Income                | 1   | 112    | 226    | 49.56 | 43.04-56.08 |             |
| High-Income               | 90  | 70111  | 167296 | 50.55 | 46.97-54.12 |             |
| <b>Development status</b> |     |        |        |       |             | <b>0.23</b> |
| Developing                | 156 | 83095  | 164103 | 52.94 | 49.88-55.99 |             |
| Developed                 | 89  | 57126  | 145468 | 50.03 | 46.38-53.67 |             |
| <b>Publication date</b>   |     |        |        |       |             | <b>0.02</b> |
| Before 2011               | 105 | 39681  | 84755  | 48.84 | 45.52-52.17 |             |
| After 2011                | 142 | 105477 | 233901 | 54.13 | 50.94-57.3  |             |
| <b>Study size</b>         |     |        |        |       |             | <b>0.09</b> |
| <1000                     | 184 | 34125  | 65010  | 53.05 | 50.3-55.79  |             |
| >1000                     | 63  | 111033 | 253646 | 48.6  | 44.26-52.95 |             |
| <b>Study quality</b>      |     |        |        |       |             | <b>0.16</b> |
| <8                        | 35  | 28295  | 63512  | 52.51 | 49.95-55.06 |             |
| ≥8                        | 212 | 11686  | 255144 | 48.15 | 42.64-53.69 |             |

| <b>Diagnosis criteria</b>         |                |              |              |                       |                   | <b>&lt;0.01</b> |
|-----------------------------------|----------------|--------------|--------------|-----------------------|-------------------|-----------------|
| KMI                               | 22             | 34238        | 73366        | 49.66                 | 44.17-55.15       |                 |
| MRS                               | 70             | 35349        | 58489        | 59.85                 | 55.68-63.95       |                 |
| Face-to-face interview            | 49             | 19390        | 48691        | 44.11                 | 39.12-49.16       |                 |
| Others                            | 55             | 30419        | 58043        | 50.12                 | 44.81-55.43       |                 |
| The Greene Climacteric Scale      | 16             | 8070         | 15089        | 50.25                 | 42.18-58.31       |                 |
| SMI                               | 2              | 650          | 2338         | 27.32                 | 11.58-46.73       |                 |
| MENQOL                            | 21             | 4334         | 8339         | 57.71                 | 50.73-64.54       |                 |
| PSQI                              | 8              | 10915        | 51441        | 38.32                 | 29.09-48          |                 |
| CS-10                             | 2              | 1417         | 2190         | 65.85                 | 60.86-70.67       |                 |
| the Midlife Women's Symptom Index | 2              | 376          | 670          | 56.13                 | 52.35-59.88       |                 |
| <b>Risk factors</b>               | <b>Studies</b> | <b>Event</b> | <b>Total</b> | <b>Prevalence (%)</b> | <b>95% CI (%)</b> | <b>P value</b>  |
| <b>Menopausal stage</b>           |                |              |              |                       |                   | <b>&lt;0.01</b> |
| Premenopause                      | 60             | 15269        | 41415        | 39.35                 | 34.3-44.52        |                 |
| Perimenopause                     | 64             | 15023        | 30263        | 52.41                 | 47.3-57.49        |                 |
| Postmenopause                     | 101            | 38554        | 73260        | 54.91                 | 51.23-58.57       |                 |
| <b>Age</b>                        |                |              |              |                       |                   | <b>0.27</b>     |
| <50                               | 12             | 5812         | 14170        | 39.61                 | 28.66-51.11       |                 |
| ≥50                               | 26             | 7359         | 15916        | 47.25                 | 39.79-54.76       |                 |
| <b>Physical activity</b>          |                |              |              |                       |                   | <b>0.40</b>     |
| Regular                           | 3              | 602          | 1279         | 49.46                 | 35.92-63.03       |                 |
| Irregular                         | 3              | 316          | 633          | 65.22                 | 31.62-92.04       |                 |
| <b>BMI</b>                        |                |              |              |                       |                   | <b>0.01</b>     |
| Underweight                       | 3              | 58           | 144          | 40.16                 | 32.14-48.44       |                 |
| Normal weight                     | 3              | 794          | 2322         | 34.79                 | 31.91-37.72       |                 |
| Overweight                        | 4              | 390          | 1017         | 42.31                 | 31.39-53.63       |                 |
| Obesity                           | 8              | 1198         | 2030         | 55.62                 | 41.57-69.24       |                 |
| <b>Urban or rural</b>             |                |              |              |                       |                   | <b>0.48</b>     |
| Rural                             | 18             | 7625         | 14812        | 45.17                 | 35.01-55.54       |                 |
| Urban                             | 7              | 6986         | 13533        | 53.98                 | 32.02-75.17       |                 |
| <b>Work</b>                       |                |              |              |                       |                   | <b>0.57</b>     |
| Working                           | 6              | 1326         | 2400         | 54.12                 | 44.09-63.98       |                 |
| Non-working                       | 5              | 309          | 534          | 59.33                 | 44.32-73.54       |                 |
| <b>Current drinking habit</b>     |                |              |              |                       |                   | <b>0.76</b>     |
| Yes                               | 2              | 96           | 246          | 38.92                 | 32.83-45.18       |                 |
| No                                | 2              | 520          | 1366         | 38.06                 | 35.5-40.66        |                 |
| <b>Current smoking</b>            |                |              |              |                       |                   | <b>0.27</b>     |
| Yes                               | 2              | 14           | 29           | 48.15                 | 29.32-67.21       |                 |

|                        |    |      |      |       |             |      |
|------------------------|----|------|------|-------|-------------|------|
| No                     | 2  | 604  | 1582 | 38.18 | 35.8-40.59  | 0.80 |
| <b>Marital status</b>  |    |      |      |       |             |      |
| Single                 | 3  | 96   | 289  | 31    | 20.01-43.07 | 0.71 |
| Married                | 4  | 816  | 3480 | 32.51 | 18.09-48.83 |      |
| Divorced               | or |      |      |       |             |      |
| Widowed                | 2  | 84   | 341  | 57.04 | 0.1-100     |      |
| <b>Education level</b> |    |      |      |       |             |      |
| <12 years              | 7  | 2021 | 4864 | 45.55 | 32.75-58.65 | 0.71 |
| >12 years              | 6  | 772  | 2086 | 36.59 | 19.18-55.99 |      |

Supplementary Table 3. Subgroup analysis and risk factors for **Heart discomfort**

| Subgroup                 | Studies | Event | Total | Prevalence (%) | 95% CI (%)  | P value         |
|--------------------------|---------|-------|-------|----------------|-------------|-----------------|
| <b>Country</b>           |         |       |       |                |             | <b>&lt;0.01</b> |
| China                    | 23      | 22179 | 68790 | 38.56          | 32.57-44.73 |                 |
| Nepal                    | 7       | 1352  | 4386  | 32.25          | 15.98-51.09 |                 |
| Nigeria                  | 5       | 861   | 2216  | 40.1           | 22.6-59.01  |                 |
| Iran                     | 4       | 1105  | 1752  | 62.67          | 27.88-91.3  |                 |
| India                    | 18      | 2166  | 4799  | 42.07          | 34.14-50.21 |                 |
| Ethiopia                 | 1       | 50    | 226   | 22.12          | 16.94-27.78 |                 |
| Turkey                   | 8       | 2383  | 4389  | 51.87          | 38.56-65.05 |                 |
| Saudi                    | 6       | 1535  | 2271  | 64.2           | 50.52-76.81 |                 |
| Australia                | 5       | 1183  | 3738  | 26.64          | 14.68-40.65 |                 |
| Japan                    | 5       | 2225  | 5657  | 38.04          | 21.29-56.41 |                 |
| Oman                     | 1       | 197   | 472   | 41.74          | 37.32-46.22 |                 |
| Macau, China             | 1       | 259   | 442   | 58.6           | 53.97-63.15 |                 |
| Ecuador                  | 5       | 809   | 1744  | 43.72          | 24.41-64.06 |                 |
| Peru                     | 1       | 434   | 771   | 56.29          | 52.77-59.78 |                 |
| Malaysia                 | 4       | 241   | 802   | 38.04          | 18.15-60.23 |                 |
| Sri Lanka                | 2       | 337   | 1033  | 32.62          | 29.79-35.51 |                 |
| Brazil                   | 3       | 1028  | 1996  | 49.03          | 43.36-54.72 |                 |
| Spain                    | 3       | 3171  | 11941 | 24.85          | 21.7-28.13  |                 |
| Pakistan                 | 4       | 2322  | 3549  | 45.02          | 26.49-64.28 |                 |
| Greece                   | 1       | 377   | 1025  | 36.78          | 33.85-39.76 |                 |
| the Philippines          | 1       | 95    | 195   | 48.72          | 41.71-55.75 |                 |
| Republic of<br>Indonesia | 2       | 263   | 377   | 58.36          | 22.76-89.62 |                 |
| Korea                    | 4       | 1887  | 3891  | 46.05          | 41.35-50.79 |                 |
| Taiwan                   | 3       | 10014 | 21124 | 43.94          | 34.55-53.55 |                 |
| Thailand                 | 1       | 80    | 150   | 53.33          | 45.3-61.28  |                 |
| Vietnam                  | 1       | 94    | 100   | 94             | 88.35-97.96 |                 |
| Poland                   | 1       | 127   | 349   | 36.39          | 31.41-41.51 |                 |
| Iraq                     | 1       | 216   | 342   | 63.16          | 57.97-68.2  |                 |
| Egypt                    | 5       | 1920  | 3704  | 51.81          | 34.21-69.19 |                 |
| Bangladesh               | 3       | 483   | 1049  | 52.54          | 19.24-84.61 |                 |

|                                    |     |       |        |       |             |                 |
|------------------------------------|-----|-------|--------|-------|-------------|-----------------|
| USA                                | 4   | 1375  | 9853   | 23.94 | 15.48-33.58 |                 |
| Cambodia                           | 1   | 107   | 177    | 60.45 | 53.13-67.55 |                 |
| Sweden                             | 1   | 52    | 108    | 48.15 | 38.75-57.61 |                 |
| New Zealand                        | 1   | 932   | 3616   | 25.77 | 24.36-27.21 |                 |
| South Africa                       | 1   | 13    | 63     | 20.63 | 11.43-31.61 |                 |
| Libya                              | 1   | 37    | 86     | 43.02 | 32.7-53.66  |                 |
| Morocco                            | 1   | 102   | 299    | 34.11 | 28.84-39.59 |                 |
| Singapore                          | 1   | 98    | 656    | 14.94 | 12.31-17.77 |                 |
| Bolivia                            | 1   | 15    | 125    | 12    | 6.82-18.34  |                 |
| Colombia                           | 1   | 563   | 1739   | 32.37 | 30.19-34.59 |                 |
| UK                                 | 1   | 51    | 253    | 20.16 | 15.43-25.34 |                 |
| Lebanon                            | 1   | 127   | 271    | 46.86 | 40.94-52.83 |                 |
| <b>Continent</b>                   |     |       |        |       |             | <b>&lt;0.01</b> |
| Asia                               | 102 | 49765 | 126674 | 44.86 | 40.89-48.86 |                 |
| Africa                             | 14  | 2983  | 6594   | 41.32 | 31.33-51.68 |                 |
| Oceania                            | 6   | 2115  | 7354   | 26.54 | 16.67-37.76 |                 |
| South America                      | 11  | 2849  | 6375   | 41.9  | 30.79-53.43 |                 |
| Europe                             | 7   | 3778  | 13676  | 29.93 | 23.13-37.21 |                 |
| North America                      | 4   | 1375  | 9853   | 23.94 | 15.48-33.58 |                 |
| <b>Income level</b>                |     |       |        |       |             | <b>&lt;0.01</b> |
| Upper-Middle-Income                | 50  | 28242 | 81314  | 42.84 | 38.18-47.57 |                 |
| Lower-Middle-Income                | 56  | 11349 | 24032  | 44.8  | 38.78-50.89 |                 |
| Low-Income                         | 1   | 50    | 226    | 22.12 | 16.94-27.78 |                 |
| High-Income                        | 37  | 23224 | 64954  | 37.71 | 31.8-43.81  |                 |
| <b>Development status</b>          |     |       |        |       |             | 0.07            |
| Developing                         | 107 | 49677 | 126464 | 43.91 | 40.13-47.73 |                 |
| Developed                          | 37  | 13188 | 44062  | 37.01 | 30.89-43.34 |                 |
| <b>Publication date</b>            |     |       |        |       |             | <b>&lt;0.01</b> |
| Before 2011                        | 51  | 12036 | 37452  | 35.98 | 30.99-41.12 |                 |
| After 2011                         | 93  | 50829 | 133074 | 45.51 | 41.45-49.61 |                 |
| <b>Study quality</b>               |     |       |        |       |             | <b>0.02</b>     |
| <8                                 | 26  | 13751 | 51862  | 34.84 | 28.35-41.62 |                 |
| ≥8                                 | 118 | 49114 | 118664 | 43.76 | 40.11-47.45 |                 |
| <b>Study size</b>                  |     |       |        |       |             | 0.18            |
| <1000                              | 109 | 16131 | 36524  | 43.34 | 39.47-47.24 |                 |
| >1000                              | 35  | 46734 | 134002 | 38.47 | 32.6-44.52  |                 |
| <b>Diagnosis criteria</b>          |     |       |        |       |             | <b>&lt;0.01</b> |
| KMI                                | 18  | 21989 | 67059  | 37.54 | 31.15-44.15 |                 |
| MRS                                | 61  | 16387 | 31546  | 50.42 | 45.27-55.56 |                 |
| The Greene<br>Climacteric<br>Scale | 13  | 4857  | 12021  | 39.19 | 31.26-47.43 |                 |

| Face-to-face interview  | 19             | 4659         | 24381        | 25.44                 | 19.38-32.02       |                 |
|-------------------------|----------------|--------------|--------------|-----------------------|-------------------|-----------------|
| SMI                     | 2              | 526          | 2338         | 21.12                 | 2.94-49.67        |                 |
| Others                  | 27             | 13520        | 30755        | 41.39                 | 34.3-48.66        |                 |
| CS-10                   | 2              | 790          | 2190         | 41.09                 | 24.33-58.98       |                 |
| MENQOL                  | 2              | 137          | 236          | 55.27                 | 32.15-77.27       |                 |
| <b>Risk factors</b>     | <b>Studies</b> | <b>Event</b> | <b>Total</b> | <b>Prevalence (%)</b> | <b>95% CI (%)</b> | <b>P value</b>  |
| <b>Menopausal stage</b> |                |              |              |                       |                   | <b>&lt;0.01</b> |
| Premenopause            | 39             | 9201         | 34571        | 29.72                 | 23.86-35.93       |                 |
| Perimenopause           | 39             | 8624         | 23436        | 41.83                 | 35.54-48.24       |                 |
| Postmenopause           | 58             | 20431        | 51148        | 46.43                 | 40.98-51.92       |                 |
| <b>Age</b>              |                |              |              |                       |                   | <b>0.88</b>     |
| <50                     | 6              | 1006         | 2292         | 37.3                  | 22.83-53          |                 |
| ≥50                     | 9              | 2228         | 5974         | 39.04                 | 24.62-54.49       |                 |
| <b>Urban or rural</b>   |                |              |              |                       |                   | <b>0.26</b>     |
| Rural                   | 10             | 5401         | 11964        | 37.5                  | 26.16-49.59       |                 |
| Urban                   | 6              | 5168         | 12936        | 53.77                 | 28.56-77.99       |                 |

Supplementary Table 4. Subgroup analysis and risk factors for **Headache**

| <b>Subgroup</b> | <b>Studies</b> | <b>Event</b> | <b>Total</b> | <b>Prevalence (%)</b> | <b>95% CI (%)</b> | <b>P value</b>  |
|-----------------|----------------|--------------|--------------|-----------------------|-------------------|-----------------|
| <b>Country</b>  |                |              |              |                       |                   | <b>&lt;0.01</b> |
| China           | 20             | 25656        | 66251        | 43.17                 | 37.41-49.02       |                 |
| UK              | 6              | 2771         | 6661         | 40.03                 | 34.92-45.25       |                 |
| France          | 2              | 289          | 900          | 32.84                 | 26.8-39.16        |                 |
| Germany         | 2              | 346          | 896          | 35.91                 | 21.23-52.08       |                 |
| Belgium         | 1              | 184          | 594          | 30.98                 | 27.32-34.76       |                 |
| Netherlands     | 2              | 309          | 901          | 32.5                  | 22.19-43.74       |                 |
| Switzerland     | 2              | 273          | 901          | 27.81                 | 15.25-42.46       |                 |
| Spain           | 4              | 3997         | 12541        | 37.6                  | 29.91-45.61       |                 |
| India           | 15             | 1494         | 3497         | 40.69                 | 32.28-49.38       |                 |
| Australia       | 8              | 2974         | 11928        | 44.56                 | 31.54-57.98       |                 |
| Japan           | 5              | 2625         | 5664         | 45.84                 | 27.62-64.65       |                 |
| Iran            | 5              | 1627         | 2995         | 48.45                 | 18.28-79.26       |                 |
| Taiwan          | 4              | 9726         | 22703        | 39.29                 | 28.16-51          |                 |
| Pakistan        | 2              | 661          | 1108         | 51.38                 | 16.31-85.68       |                 |
| Singapore       | 2              | 418          | 1151         | 35.51                 | 25.26-46.49       |                 |
| Malaysia        | 3              | 266          | 590          | 45.56                 | 24.8-67.15        |                 |
| Greece          | 1              | 375          | 1025         | 36.59                 | 33.66-39.56       |                 |
| Italy           | 2              | 228          | 635          | 34.76                 | 13.31-60.12       |                 |
| Poland          | 1              | 173          | 349          | 49.57                 | 44.33-54.82       |                 |
| Korea           | 1              | 125          | 743          | 16.82                 | 14.22-19.6        |                 |
| USA             | 6              | 1040         | 2264         | 47.74                 | 37.45-58.14       |                 |
| Egypt           | 1              | 428          | 450          | 95.11                 | 92.91-96.93       |                 |
| Ecuador         | 2              | 529          | 710          | 74.34                 | 52.2-91.36        |                 |

|                           |    |       |        |       |             |                 |
|---------------------------|----|-------|--------|-------|-------------|-----------------|
| Bangladesh                | 2  | 551   | 659    | 78.72 | 52.9-96.04  |                 |
| Qatar                     | 1  | 570   | 1158   | 49.22 | 46.34-52.1  |                 |
| United Arab Emirates      | 1  | 181   | 390    | 46.41 | 41.48-51.38 |                 |
| Nigeria                   | 3  | 471   | 1153   | 46.52 | 17.25-77.17 |                 |
| Finland                   | 1  | 99    | 1184   | 8.36  | 6.85-10.01  |                 |
| New Zealand               | 1  | 1225  | 3616   | 33.88 | 32.34-35.43 |                 |
| Turkey                    | 3  | 891   | 1700   | 50.31 | 31.25-69.32 |                 |
| Multi                     | 1  | 810   | 3520   | 23.01 | 21.64-24.42 |                 |
| South Africa              | 1  | 31    | 63     | 49.21 | 36.87-61.59 |                 |
| Saudi                     | 1  | 71    | 90     | 78.89 | 69.79-86.76 |                 |
| Brazil                    | 2  | 297   | 581    | 52.91 | 38.98-66.62 |                 |
| Mexico                    | 1  | 401   | 755    | 53.11 | 49.54-56.66 |                 |
| Hong Kong                 | 2  | 505   | 1128   | 49.58 | 35.57-63.63 |                 |
| Morocco                   | 1  | 173   | 299    | 57.86 | 52.21-63.41 |                 |
| Thailand                  | 2  | 188   | 298    | 63.52 | 40.82-83.46 |                 |
| Bolivia                   | 1  | 28    | 125    | 22.4  | 15.48-30.16 |                 |
| Jordan                    | 2  | 96    | 280    | 33.5  | 12.53-58.58 |                 |
| Lebanon                   | 1  | 141   | 271    | 52.03 | 46.06-57.97 |                 |
| Nepal                     | 1  | 44    | 180    | 24.44 | 18.42-31.01 |                 |
| <b>Continent</b>          |    |       |        |       |             | <b>&lt;0.01</b> |
| Asia                      | 73 | 45836 | 110856 | 44.95 | 40.63-49.3  |                 |
| Europe                    | 24 | 9044  | 26587  | 34.7  | 30.46-39.05 |                 |
| Oceania                   | 9  | 4199  | 15544  | 43.33 | 31.65-55.39 |                 |
| North America             | 7  | 1441  | 3019   | 48.53 | 39.67-57.43 |                 |
| Africa                    | 6  | 1103  | 1965   | 58.85 | 35.16-80.57 |                 |
| South America             | 5  | 854   | 1416   | 55.72 | 34.67-75.75 |                 |
| Multi                     | 1  | 810   | 3520   | 23.01 | 21.64-24.42 |                 |
| <b>Income level</b>       |    |       |        |       |             | <b>&lt;0.05</b> |
| Upper-Middle-Income       | 36 | 28355 | 71228  | 47.3  | 42.16-52.46 |                 |
| High-Income               | 57 | 29314 | 80942  | 39.81 | 35.94-43.74 |                 |
| Lower-Middle-Income       | 32 | 5618  | 10737  | 47.39 | 38.55-56.31 |                 |
| <b>Development status</b> |    |       |        |       |             | <b>0.01</b>     |
| Developing                | 72 | 43801 | 104750 | 47.34 | 42.64-52.07 |                 |
| Developed                 | 53 | 19468 | 58157  | 39.3  | 35.27-43.41 |                 |
| <b>Publication date</b>   |    |       |        |       |             | <b>0.19</b>     |
| Before 2011               | 50 | 41996 | 104448 | 46.5  | 41.94-51.08 |                 |
| After 2011                | 75 | 21291 | 58459  | 42.17 | 37.68-46.72 |                 |
| <b>Study size</b>         |    |       |        |       |             | <b>0.06</b>     |
| <1000                     | 93 | 15735 | 34027  | 45.54 | 41.54-49.57 |                 |
| >1000                     | 32 | 47552 | 128880 | 39.35 | 34.24-44.57 |                 |
| <b>Study quality</b>      |    |       |        |       |             | <b>0.38</b>     |

|                              |                |              |              |                       |                   |                 |
|------------------------------|----------------|--------------|--------------|-----------------------|-------------------|-----------------|
| <8                           | 18             | 14181        | 39798        | 47.26                 | 39.45-55.13       |                 |
| ≥8                           | 107            | 49106        | 123109       | 43.35                 | 39.76-46.97       |                 |
| <b>Diagnosis criteria</b>    |                |              |              |                       |                   | <b>&lt;0.01</b> |
| KMI                          | 20             | 26390        | 68179        | 43.23                 | 37.98-48.55       |                 |
| Face-to-face interview       | 43             | 10308        | 34917        | 37.41                 | 31.69-43.32       |                 |
| Others                       | 31             | 17222        | 40308        | 43.68                 | 37.79-49.67       |                 |
| The Greene Climacteric Scale | 13             | 5329         | 11477        | 51.26                 | 43.91-58.59       |                 |
| SMI                          | 2              | 621          | 2338         | 25.69                 | 7.03-50.92        |                 |
| MRS                          | 4              | 794          | 1149         | 63.61                 | 35.73-87.3        |                 |
| MENQOL                       | 12             | 2623         | 4539         | 58.04                 | 48.19-67.58       |                 |
| <b>Risk factors</b>          | <b>Studies</b> | <b>Event</b> | <b>Total</b> | <b>Prevalence (%)</b> | <b>95% CI (%)</b> | <b>P value</b>  |
| <b>Menopausal stage</b>      |                |              |              |                       |                   | 0.30            |
| Premenopause                 | 25             | 10614        | 31407        | 41.43                 | 34.06-49.01       |                 |
| Perimenopause                | 27             | 9159         | 22405        | 49.13                 | 41.97-56.32       |                 |
| Postmenopause                | 48             | 19019        | 48500        | 47.73                 | 42.02-53.47       |                 |
| <b>Age</b>                   |                |              |              |                       |                   |                 |
| <50                          | 6              | 1938         | 10314        | 32.48                 | 22.77-43.02       |                 |
| ≥50                          | 13             | 3055         | 10183        | 33.62                 | 21.91-46.45       |                 |
| <b>Urban or rural</b>        |                |              |              |                       |                   | 0.22            |
| Rural                        | 7              | 3209         | 7393         | 49.05                 | 34.05-64.15       |                 |
| Urban                        | 4              | 5067         | 12232        | 35.76                 | 21.99-50.83       |                 |

Supplementary Table 5. Subgroup analysis and risk factors for **Joint and muscular discomfort**

| <b>Subgroup</b> | <b>Studies</b> | <b>Event</b> | <b>Total</b> | <b>Prevalence (%)</b> | <b>95% CI (%)</b> | <b>P value</b>  |
|-----------------|----------------|--------------|--------------|-----------------------|-------------------|-----------------|
| <b>Country</b>  |                |              |              |                       |                   | <b>&lt;0.01</b> |
| China           | 27             | 32966        | 74834        | 49.81                 | 42.63-56.99       |                 |
| Nepal           | 7              | 2330         | 4386         | 58.76                 | 39.55-76.69       |                 |
| Nigeria         | 8              | 2190         | 3567         | 62.99                 | 47.44-77.28       |                 |
| Iran            | 9              | 5088         | 6863         | 74.01                 | 60.12-85.81       |                 |
| India           | 32             | 5236         | 7667         | 71.53                 | 63.88-78.61       |                 |
| Ethiopia        | 1              | 73           | 226          | 32.3                  | 26.35-38.55       |                 |
| Turkey          | 8              | 2359         | 3712         | 63.86                 | 55.81-71.54       |                 |
| Saudi           | 7              | 1983         | 2361         | 86.46                 | 79.69-92.06       |                 |
| Australia       | 9              | 4531         | 13075        | 61.42                 | 44.16-77.31       |                 |
| Japan           | 6              | 5042         | 7628         | 68.24                 | 56.44-78.96       |                 |
| Oman            | 1              | 351          | 472          | 74.36                 | 70.32-78.21       |                 |
| Macau, China    | 1              | 391          | 442          | 88.46                 | 85.31-91.28       |                 |
| Taiwan          | 4              | 12739        | 22520        | 52.8                  | 29.97-75.03       |                 |
| Ecuador         | 6              | 1711         | 2069         | 82.91                 | 79.01-86.49       |                 |
| Peru            | 1              | 600          | 771          | 77.82                 | 74.82-80.69       |                 |



|                          |     |       |        |       |                 |
|--------------------------|-----|-------|--------|-------|-----------------|
| Pakistan                 | 5   | 3824  | 4904   | 73.95 | 64.51-82.4      |
| Malaysia                 | 6   | 1065  | 1404   | 77.39 | 70.31-83.78     |
| Sri Lanka                | 2   | 800   | 1033   | 78.76 | 70.25-86.18     |
| Brazil                   | 3   | 1436  | 1996   | 67.07 | 53.24-79.56     |
| Spain                    | 3   | 4986  | 11941  | 51.76 | 37.49-65.88     |
| Korea                    | 6   | 3486  | 5799   | 61.33 | 48.79-73.15     |
| Singapore                | 2   | 601   | 1151   | 52.22 | 49.32-55.1      |
| Greece                   | 1   | 485   | 1025   | 47.32 | 44.27-50.38     |
| the Philippines          | 1   | 175   | 195    | 89.74 | 85.06-93.65     |
| Republic of<br>Indonesia | 3   | 1080  | 1377   | 84.78 | 73.65-93.32     |
| Thailand                 | 2   | 260   | 298    | 87.37 | 81.47-92.29     |
| Vietnam                  | 1   | 96    | 100    | 96    | 91.09-99.13     |
| Poland                   | 1   | 191   | 349    | 54.73 | 49.48-59.93     |
| Iraq                     | 1   | 318   | 342    | 92.98 | 90.01-95.47     |
| Italy                    | 1   | 325   | 1028   | 31.61 | 28.81-34.49     |
| USA                      | 10  | 4246  | 12895  | 55.95 | 45.27-66.37     |
| UK                       | 4   | 3221  | 5760   | 49.77 | 41.91-57.63     |
| Egypt                    | 5   | 3120  | 3704   | 85.08 | 77.68-91.21     |
| Bangladesh               | 4   | 1702  | 2639   | 70.82 | 57.27-82.72     |
| Qatar                    | 1   | 413   | 1158   | 35.66 | 32.93-38.45     |
| United Arab<br>Emirates  | 1   | 135   | 390    | 34.62 | 29.97-39.42     |
| Cambodia                 | 1   | 141   | 177    | 79.66 | 73.39-85.29     |
| Sweden                   | 2   | 639   | 1233   | 55.01 | 45.22-64.61     |
| Finland                  | 1   | 265   | 1184   | 22.38 | 20.05-24.8      |
| Multi                    | 3   | 6091  | 11317  | 52.62 | 30.25-74.44     |
| New Zealand              | 1   | 2317  | 3616   | 64.08 | 62.5-65.63      |
| South Africa             | 1   | 38    | 63     | 60.32 | 47.9-72.11      |
| Libya                    | 1   | 64    | 86     | 74.42 | 64.61-83.14     |
| Mexico                   | 2   | 2821  | 5303   | 53.73 | 51.11-56.33     |
| Hong Kong                | 1   | 553   | 978    | 56.54 | 53.42-59.64     |
| Morocco                  | 1   | 161   | 299    | 53.85 | 48.17-59.47     |
| Bolivia                  | 1   | 18    | 125    | 14.4  | 8.74-21.15      |
| Colombia                 | 1   | 1239  | 1739   | 71.25 | 69.1-73.35      |
| Jordan                   | 1   | 126   | 143    | 88.11 | 82.24-92.96     |
| Lebanon                  | 1   | 119   | 271    | 43.91 | 38.04-49.87     |
| <b>Continent</b>         |     |       |        |       | <b>&lt;0.01</b> |
| Asia                     | 141 | 83379 | 153244 | 67.37 | 63.83-70.81     |
| Africa                   | 17  | 5646  | 7945   | 68.54 | 58.22-78.01     |
| Oceania                  | 10  | 6848  | 16691  | 61.69 | 46.27-75.99     |
| South America            | 12  | 5004  | 6700   | 72.59 | 60.87-82.92     |

|                                   |                |              |              |                       |                   |                 |
|-----------------------------------|----------------|--------------|--------------|-----------------------|-------------------|-----------------|
| Europe                            | 14             | 13298        | 27311        | 48.84                 | 42.04-55.67       |                 |
| North America                     | 12             | 7067         | 18198        | 55.63                 | 46.81-64.27       |                 |
| Multi                             | 2              | 2905         | 6526         | 45.52                 | 17.01-75.76       |                 |
| <b>Income level</b>               |                |              |              |                       |                   | <b>&lt;0.01</b> |
| Upper-Middle-Income               | 62             | 47243        | 96208        | 63.99                 | 58.87-68.94       |                 |
| Lower-Middle-Income               | 81             | 26080        | 37307        | 71.3                  | 66.68-75.72       |                 |
| Low-Income                        | 1              | 73           | 226          | 32.3                  | 26.35-38.55       |                 |
| High-Income                       | 64             | 50751        | 102874       | 59.66                 | 54.63-64.6        |                 |
| <b>Development status</b>         |                |              |              |                       |                   | 0.08            |
| Developing                        | 145            | 83970        | 153093       | 67.08                 | 63.55-70.51       |                 |
| Developed                         | 62             | 38328        | 80516        | 61.57                 | 56.4-66.62        |                 |
| <b>Publication date</b>           |                |              |              |                       |                   | 0.29            |
| Before 2011                       | 83             | 38792        | 72143        | 63.54                 | 59.13-67.85       |                 |
| After 2011                        | 125            | 85355        | 164472       | 66.67                 | 62.8-70.43        |                 |
| <b>Study size</b>                 |                |              |              |                       |                   | <b>&lt;0.01</b> |
| <1000                             | 153            | 35354        | 52415        | 69.42                 | 66.12-72.62       |                 |
| >1000                             | 55             | 88793        | 184200       | 54.16                 | 49.33-58.95       |                 |
| <b>Study quality</b>              |                |              |              |                       |                   | 0.21            |
| <8                                | 33             | 25927        | 58289        | 61.22                 | 53.87-68.32       |                 |
| ≥8                                | 175            | 98220        | 178326       | 66.21                 | 63.04-69.32       |                 |
| <b>Diagnosis criteria</b>         |                |              |              |                       |                   | <b>&lt;0.01</b> |
| KMI                               | 21             | 31245        | 71320        | 49.15                 | 43.22-55.09       |                 |
| MRS                               | 67             | 33142        | 46655        | 76.74                 | 73.53-79.8        |                 |
| The Greene Climacteric Scale      | 15             | 8800         | 14202        | 62.45                 | 55.18-69.45       |                 |
| Face-to-face interview            | 29             | 12487        | 38874        | 45.63                 | 36.86-54.54       |                 |
| SMI                               | 2              | 1422         | 2338         | 61.34                 | 32.12-86.67       |                 |
| Others                            | 45             | 26392        | 47307        | 63.58                 | 57.25-69.68       |                 |
| MENQOL                            | 23             | 6656         | 10029        | 73.99                 | 66.18-81.11       |                 |
| The Keio questionnaire            | 2              | 2017         | 3030         | 72.02                 | 40.51-94.64       |                 |
| CS-10                             | 2              | 1638         | 2190         | 80.5                  | 61.28-94.23       |                 |
| the Midlife Women's Symptom Index | 2              | 348          | 670          | 51.94                 | 48.14-55.73       |                 |
| <b>Risk factors</b>               | <b>Studies</b> | <b>Event</b> | <b>Total</b> | <b>Prevalence (%)</b> | <b>95% CI (%)</b> | <b>P value</b>  |
| <b>Menopausal stage</b>           |                |              |              |                       |                   | <b>&lt;0.01</b> |
| Premenopause                      | 51             | 15753        | 39037        | 52.83                 | 46.43-59.2        |                 |

|                       |    |       |       |       |             |             |
|-----------------------|----|-------|-------|-------|-------------|-------------|
| Perimenopause         | 55 | 14575 | 27650 | 66.01 | 59.78-71.98 |             |
| Postmenopause         | 84 | 37684 | 65103 | 71.16 | 66.99-75.15 |             |
| <b>Age</b>            |    |       |       |       |             | <b>0.04</b> |
| <50                   | 8  | 2190  | 10759 | 41.94 | 28.33-56.19 |             |
| ≥50                   | 14 | 5141  | 10763 | 61.53 | 49.74-72.68 |             |
| <b>Urban or rural</b> |    |       |       |       |             | <b>0.64</b> |
| Rural                 | 18 | 8438  | 13282 | 67.65 | 56.82-77.61 |             |
| Urban                 | 8  | 6990  | 13871 | 72.37 | 54.22-87.36 |             |
| <b>Work</b>           |    |       |       |       |             | <b>0.89</b> |
| Working               | 4  | 1299  | 1954  | 49.08 | 21.41-77.05 |             |
| Non-working           | 3  | 143   | 410   | 44.64 | 2.81-92.36  |             |

Supplementary Table 6. Subgroup analysis and risk factors for **Physical and mental exhaustion**

| <b>Subgroup</b> | <b>Studies</b> | <b>Event</b> | <b>Total</b> | <b>Prevalence (%)</b> | <b>95% CI (%)</b> | <b>P value</b>  |
|-----------------|----------------|--------------|--------------|-----------------------|-------------------|-----------------|
| <b>Country</b>  |                |              |              |                       |                   | <b>&lt;0.01</b> |
| China           | 24             | 35550        | 73547        | 57.27                 | 50.11-64.27       |                 |
| Nepal           | 7              | 2192         | 4386         | 57.9                  | 33.57-80.36       |                 |
| Nigeria         | 6              | 1307         | 2834         | 53.36                 | 30.86-75.17       |                 |
| Iran            | 7              | 3303         | 5917         | 62.83                 | 42.59-80.97       |                 |
| India           | 32             | 5131         | 7763         | 68.67                 | 60.77-76.08       |                 |
| Ethiopia        | 1              | 79           | 226          | 34.96                 | 28.86-41.31       |                 |
| Turkey          | 8              | 2532         | 3712         | 69.84                 | 59.07-79.61       |                 |
| Saudi           | 7              | 1908         | 2361         | 79.72                 | 75.91-83.28       |                 |
| Oman            | 1              | 226          | 472          | 47.88                 | 43.38-52.4        |                 |
| Macau, China    | 1              | 399          | 442          | 90.27                 | 87.32-92.87       |                 |
| Taiwan          | 4              | 14398        | 22600        | 35.19                 | 16.12-57.11       |                 |
| Ecuador         | 6              | 1409         | 2069         | 68.16                 | 56.6-78.69        |                 |
| Peru            | 1              | 565          | 771          | 73.28                 | 70.1-76.35        |                 |
| Japan           | 4              | 2812         | 4234         | 69.94                 | 44.12-90.34       |                 |
| Pakistan        | 3              | 3250         | 3983         | 76                    | 63.96-86.26       |                 |
| Malaysia        | 6              | 1094         | 1701         | 65.77                 | 51.89-78.4        |                 |
| Sri Lanka       | 2              | 591          | 1033         | 58.67                 | 48.92-68.08       |                 |
| Brazil          | 3              | 1287         | 1996         | 67.59                 | 59.6-75.1         |                 |
| Spain           | 4              | 4107         | 13000        | 35.16                 | 27.46-43.28       |                 |
| Korea           | 3              | 3982         | 4998         | 74.45                 | 50.7-92.29        |                 |
| Germany         | 1              | 1183         | 1893         | 62.49                 | 60.3-64.66        |                 |
| Singapore       | 1              | 192          | 495          | 38.79                 | 34.54-43.13       |                 |
| Greece          | 1              | 508          | 1025         | 49.56                 | 46.5-52.62        |                 |
| Poland          | 1              | 268          | 349          | 76.79                 | 72.21-81.08       |                 |
| Iraq            | 2              | 737          | 842          | 89.05                 | 76.61-97.18       |                 |
| USA             | 6              | 1133         | 2264         | 50.8                  | 39.97-61.58       |                 |

|                           |     |       |        |       |             |                 |
|---------------------------|-----|-------|--------|-------|-------------|-----------------|
| UK                        | 4   | 4503  | 5781   | 61.69 | 42.17-79.44 |                 |
| Egypt                     | 5   | 2966  | 3704   | 82.63 | 72.2-91.03  |                 |
| Bangladesh                | 3   | 725   | 1049   | 72.9  | 59.84-84.21 |                 |
| Qatar                     | 1   | 311   | 1158   | 26.86 | 24.34-29.45 |                 |
| United Arab Emirates      | 1   | 104   | 390    | 26.67 | 22.39-31.17 |                 |
| Cambodia                  | 1   | 156   | 177    | 88.14 | 82.92-92.53 |                 |
| Australia                 | 7   | 2700  | 3701   | 76.5  | 67.02-84.82 |                 |
| Sweden                    | 1   | 80    | 109    | 73.39 | 64.66-81.31 |                 |
| Finland                   | 1   | 60    | 1184   | 5.07  | 3.89-6.39   |                 |
| New Zealand               | 1   | 2412  | 3616   | 66.7  | 65.16-68.23 |                 |
| Multi                     | 1   | 1619  | 3520   | 45.99 | 44.35-47.64 |                 |
| South Africa              | 1   | 48    | 63     | 76.19 | 64.81-85.99 |                 |
| Republic of Indonesia     | 1   | 275   | 318    | 86.48 | 82.49-90.03 |                 |
| Libya                     | 1   | 48    | 86     | 55.81 | 45.18-66.2  |                 |
| Mexico                    | 2   | 3299  | 5303   | 65.18 | 56.62-73.27 |                 |
| Hong Kong                 | 1   | 528   | 978    | 53.99 | 50.86-57.1  |                 |
| Morocco                   | 1   | 185   | 299    | 61.87 | 56.29-67.31 |                 |
| Thailand                  | 1   | 101   | 148    | 68.24 | 60.49-75.52 |                 |
| Colombia                  | 1   | 933   | 1739   | 53.65 | 51.3-55.99  |                 |
| Lebanon                   | 1   | 214   | 271    | 78.97 | 73.9-83.63  |                 |
| <b>Continent</b>          |     |       |        |       |             | <b>&lt;0.01</b> |
| Asia                      | 122 | 80711 | 142975 | 65.24 | 61.33-69.06 |                 |
| Africa                    | 15  | 4633  | 7212   | 65.01 | 52.3-76.73  |                 |
| South America             | 11  | 4194  | 6575   | 67.25 | 60.38-73.77 |                 |
| Europe                    | 13  | 10709 | 23341  | 49.54 | 36.09-63.02 |                 |
| North America             | 8   | 4432  | 7567   | 54.6  | 45.21-63.83 |                 |
| Oceania                   | 8   | 5112  | 7317   | 75.28 | 66.69-82.98 |                 |
| Multi                     | 1   | 1619  | 3520   | 45.99 | 44.35-47.64 |                 |
| <b>Income level</b>       |     |       |        |       |             | <b>&lt;0.01</b> |
| Upper-Middle-Income       | 57  | 48002 | 92419  | 64.62 | 60.19-68.94 |                 |
| Lower-Middle-Income       | 69  | 20295 | 31734  | 67.79 | 62.32-73.02 |                 |
| Low-Income                | 1   | 79    | 226    | 34.96 | 28.86-41.31 |                 |
| High-Income               | 51  | 43034 | 74128  | 59.07 | 52.52-65.46 |                 |
| <b>Development status</b> |     |       |        |       |             | 0.22            |
| Developing                | 128 | 82163 | 145950 | 65.39 | 61.67-69.01 |                 |
| Developed                 | 50  | 29247 | 52557  | 60.89 | 54.61-66.99 |                 |
| <b>Publication date</b>   |     |       |        |       |             | <b>&lt;0.01</b> |
| Before 2011               | 60  | 23135 | 46654  | 56.06 | 50.16-61.87 |                 |

| After 2011                | 118            | 88275        | 151853       | 68.11                 | 64.53-71.58       |                 |
|---------------------------|----------------|--------------|--------------|-----------------------|-------------------|-----------------|
| <b>Study quality</b>      |                |              |              |                       |                   | <b>0.30</b>     |
| <8                        | 27             | 22931        | 45773        | 60.46                 | 52.99-67.69       |                 |
| ≥8                        | 151            | 88479        | 152734       | 64.78                 | 61.25-68.23       |                 |
| <b>Study size</b>         |                |              |              |                       |                   | <b>&lt;0.01</b> |
| <1000                     | 131            | 29877        | 45226        | 67.14                 | 63.55-70.63       |                 |
| >1000                     | 47             | 81533        | 153281       | 55.69                 | 49.49-61.81       |                 |
| <b>Diagnosis criteria</b> |                |              |              |                       |                   | <b>&lt;0.01</b> |
| KMI                       | 21             | 33960        | 71320        | 54.99                 | 48.41-61.48       |                 |
| MRS                       | 65             | 26989        | 38088        | 71.64                 | 67.78-75.35       |                 |
| Others                    | 33             | 28606        | 46040        | 57.59                 | 49.99-65.02       |                 |
| SMI                       | 2              | 1165         | 2338         | 49.82                 | 22-77.7           |                 |
| The Greene                |                |              |              |                       |                   |                 |
| Climacteric               | 13             | 7540         | 12057        | 64.07                 | 54.49-73.12       |                 |
| Scale                     |                |              |              |                       |                   |                 |
| Face-to-face              |                |              |              |                       |                   |                 |
| interview                 | 18             | 5831         | 17661        | 45.85                 | 32.41-59.62       |                 |
| MENQOL                    | 22             | 5783         | 8439         | 73.71                 | 64.23-82.2        |                 |
| CS-10                     | 2              | 1232         | 2190         | 59.9                  | 47.3-71.87        |                 |
| WHAS                      | 2              | 304          | 374          | 82.97                 | 65.81-95.05       |                 |
| <b>Risk factors</b>       | <b>Studies</b> | <b>Event</b> | <b>Total</b> | <b>Prevalence (%)</b> | <b>95% CI (%)</b> | <b>P value</b>  |
| <b>Menopausal stage</b>   |                |              |              |                       |                   | <b>0.02</b>     |
| Premenopause              | 47             | 17115        | 37222        | 53.57                 | 46.75-60.32       |                 |
| Perimenopause             | 52             | 14104        | 26811        | 62.96                 | 56.37-69.33       |                 |
| Postmenopause             | 76             | 34045        | 61673        | 65.75                 | 60.58-70.75       |                 |
| <b>Age</b>                |                |              |              |                       |                   | <b>0.17</b>     |
| <50                       | 7              | 997          | 1902         | 51.15                 | 40.83-61.42       |                 |
| ≥50                       | 11             | 4783         | 9016         | 62.79                 | 49.85-74.86       |                 |
| <b>Urban or rural</b>     |                |              |              |                       |                   | <b>0.94</b>     |
| Rural                     | 15             | 7910         | 12964        | 66.5                  | 53.37-78.45       |                 |
| Urban                     | 6              | 5925         | 12586        | 67.6                  | 40.82-89.33       |                 |

Supplementary Table 7. Subgroup analysis and risk factors for **Anxiety**

| <b>Subgroup</b> | <b>Studies</b> | <b>Event</b> | <b>Total</b> | <b>Prevalence (%)</b> | <b>95% CI (%)</b> | <b>P value</b>  |
|-----------------|----------------|--------------|--------------|-----------------------|-------------------|-----------------|
| <b>Country</b>  |                |              |              |                       |                   | <b>&lt;0.01</b> |
| Nepal           | 7              | 1413         | 4386         | 39.41                 | 24-55.98          |                 |
| Nigeria         | 6              | 964          | 3032         | 36.59                 | 17.66-57.96       |                 |
| Iran            | 6              | 1994         | 3705         | 60.03                 | 33.12-84.03       |                 |
| India           | 25             | 3567         | 6031         | 59.52                 | 47.23-71.23       |                 |
| Ethiopia        | 1              | 90           | 226          | 39.82                 | 33.52-46.3        |                 |
| Turkey          | 6              | 1683         | 3061         | 62.87                 | 47.02-77.42       |                 |
| Saudi           | 7              | 1629         | 2361         | 64.5                  | 44.97-81.82       |                 |

|                       |    |       |       |       |                 |
|-----------------------|----|-------|-------|-------|-----------------|
| Australia             | 8  | 2463  | 4415  | 60.7  | 51.71-69.34     |
| Japan                 | 3  | 2231  | 3323  | 67.25 | 64.62-69.83     |
| Oman                  | 1  | 223   | 472   | 47.25 | 42.75-51.76     |
| Multi                 | 3  | 7729  | 13876 | 55.35 | 50.2-60.44      |
| Macau, China          | 1  | 308   | 442   | 69.68 | 65.31-73.89     |
| Ecuador               | 6  | 1242  | 2069  | 58.76 | 46.74-70.26     |
| Peru                  | 1  | 551   | 771   | 71.47 | 68.22-74.6      |
| Malaysia              | 4  | 592   | 1216  | 50.2  | 32.06-68.31     |
| China                 | 12 | 5590  | 26910 | 26.49 | 17.3-36.85      |
| Sri Lanka             | 2  | 306   | 1033  | 32.69 | 13.06-56.16     |
| Brazil                | 2  | 1183  | 1626  | 72.79 | 70.59-74.93     |
| Korea                 | 2  | 2345  | 4255  | 55.15 | 53.42-56.87     |
| Singapore             | 2  | 230   | 1151  | 19.98 | 17.71-22.34     |
| Pakistan              | 2  | 2342  | 3183  | 58.55 | 24.83-88.29     |
| Iraq                  | 2  | 461   | 842   | 57.82 | 28.9-84.09      |
| USA                   | 12 | 5365  | 20259 | 33.72 | 26.87-40.93     |
| UK                    | 3  | 2029  | 4643  | 41.79 | 37.4-46.25      |
| Egypt                 | 5  | 2140  | 3704  | 61.18 | 43.6-77.38      |
| Bangladesh            | 3  | 580   | 1049  | 62.32 | 34.49-86.36     |
| Qatar                 | 2  | 566   | 2259  | 23.96 | 6.75-47.45      |
| United Arab Emirates  | 1  | 102   | 390   | 26.15 | 21.9-30.64      |
| Cambodia              | 1  | 142   | 177   | 80.23 | 74.01-85.79     |
| Sweden                | 1  | 57    | 108   | 52.78 | 43.3-62.15      |
| Republic of Indonesia | 2  | 619   | 1318  | 54.88 | 25.83-82.23     |
| New Zealand           | 1  | 1529  | 3616  | 42.28 | 40.68-43.9      |
| South Africa          | 1  | 30    | 63    | 47.62 | 35.34-60.04     |
| Libya                 | 1  | 53    | 86    | 61.63 | 51.07-71.67     |
| Spain                 | 2  | 665   | 1427  | 45.89 | 41.32-50.49     |
| Mexico                | 1  | 503   | 755   | 66.62 | 63.22-69.94     |
| Morocco               | 1  | 132   | 299   | 44.15 | 38.55-49.82     |
| Thailand              | 1  | 115   | 148   | 77.7  | 70.61-84.08     |
| Poland                | 1  | 116   | 241   | 48.13 | 41.84-54.46     |
| Belarus               | 1  | 25    | 119   | 21.01 | 14.12-28.83     |
| Belgium               | 1  | 58    | 79    | 73.42 | 63.07-82.64     |
| Greece                | 1  | 23    | 100   | 23    | 15.23-31.8      |
| Colombia              | 1  | 597   | 1739  | 34.33 | 32.12-36.58     |
| Lebanon               | 1  | 157   | 271   | 57.93 | 52-63.76        |
| <b>Continent</b>      |    |       |       |       | <b>&lt;0.01</b> |
| Asia                  | 93 | 27195 | 67983 | 51.75 | 46.16-57.32     |
| Africa                | 15 | 3409  | 7410  | 47.87 | 36.46-59.4      |

|                              |                |              |              |                       |                   |                 |
|------------------------------|----------------|--------------|--------------|-----------------------|-------------------|-----------------|
| Oceania                      | 9              | 3992         | 8031         | 58.63                 | 49.7-67.29        |                 |
| South America                | 11             | 7202         | 12284        | 60.49                 | 51.49-69.15       |                 |
| North America                | 13             | 5868         | 21014        | 36.25                 | 28.28-44.62       |                 |
| Europe                       | 11             | 5402         | 11508        | 43.64                 | 35.49-51.96       |                 |
| Multi                        | 1              | 1671         | 3006         | 55.59                 | 53.81-57.36       |                 |
| <b>Income level</b>          |                |              |              |                       |                   | <b>0.03</b>     |
| Lower-Middle-Income          | 61             | 14356        | 28188        | 54.29                 | 47.26-61.23       |                 |
| Low-Income                   | 1              | 90           | 226          | 39.82                 | 33.52-46.3        |                 |
| Upper-Middle-Income          | 41             | 14604        | 42853        | 49.04                 | 41.83-56.26       |                 |
| High-Income                  | 49             | 22060        | 53890        | 47.15                 | 41.47-52.86       |                 |
| <b>Development status</b>    |                |              |              |                       |                   | <b>0.08</b>     |
| Developing                   | 100            | 27174        | 67598        | 52.76                 | 47.58-57.91       |                 |
| Developed                    | 51             | 22265        | 54553        | 45.91                 | 40.42-51.45       |                 |
| <b>Publication date</b>      |                |              |              |                       |                   | <b>0.02</b>     |
| Before 2011                  | 54             | 21254        | 54269        | 44.85                 | 39.18-50.59       |                 |
| After 2011                   | 99             | 33485        | 76967        | 53.66                 | 48.64-58.65       |                 |
| <b>Study size</b>            |                |              |              |                       |                   | <b>&lt;0.01</b> |
| <1000                        | 119            | 21542        | 40474        | 53.92                 | 49.55-58.27       |                 |
| >1000                        | 34             | 33197        | 90762        | 38.99                 | 32.14-46.07       |                 |
| <b>Study quality</b>         |                |              |              |                       |                   | <b>0.30</b>     |
| <8                           | 24             | 9600         | 25450        | 46.77                 | 39.62-53.98       |                 |
| ≥8                           | 129            | 45139        | 105786       | 51.23                 | 46.84-55.62       |                 |
| <b>Diagnosis criteria</b>    |                |              |              |                       |                   | <b>&lt;0.01</b> |
| MRS                          | 64             | 26973        | 47330        | 57.13                 | 52.24-61.96       |                 |
| The Greene Climacteric Scale | 11             | 4985         | 9473         | 52.05                 | 42.75-61.28       |                 |
| Face-to-face interview       | 18             | 7119         | 30863        | 31.72                 | 22.59-41.62       |                 |
| MENQOL                       | 22             | 4950         | 8439         | 63.93                 | 55.11-72.31       |                 |
| Others                       | 23             | 6305         | 16115        | 42.7                  | 31.82-53.94       |                 |
| SAS                          | 2              | 291          | 1460         | 49.08                 | 0-100             |                 |
| KMI                          | 4              | 1394         | 5772         | 26.98                 | 11.17-46.56       |                 |
| GAD                          | 3              | 1582         | 9055         | 26.97                 | 13.37-43.23       |                 |
| CS-10                        | 2              | 918          | 2190         | 52.89                 | 18.44-85.83       |                 |
| BDI                          | 4              | 222          | 539          | 40.73                 | 18.12-65.61       |                 |
| <b>Risk factors</b>          | <b>Studies</b> | <b>Event</b> | <b>Total</b> | <b>Prevalence (%)</b> | <b>95% CI (%)</b> | <b>P value</b>  |
| <b>Menopausal stage</b>      |                |              |              |                       |                   | <b>0.22</b>     |
| Premenopause                 | 38             | 4112         | 13768        | 46.57                 | 38.83-54.38       |                 |
| Perimenopause                | 41             | 3918         | 10346        | 53.41                 | 45.39-61.34       |                 |

|                        |    |       |       |       |             |             |
|------------------------|----|-------|-------|-------|-------------|-------------|
| Postmenopause          | 56 | 11046 | 25802 | 55.7  | 48.74-62.55 |             |
| <b>Age</b>             |    |       |       |       |             | <b>0.53</b> |
| <50                    | 6  | 562   | 2102  | 44.67 | 22.17-68.37 |             |
| ≥50                    | 8  | 1217  | 3175  | 55.11 | 33.9-75.4   |             |
| <b>BMI</b>             |    |       |       |       |             | <b>0.02</b> |
| Underweight            | 1  | 118   | 681   | 17.33 | 14.57-20.27 |             |
| Normal weight          | 1  | 531   | 3865  | 13.74 | 12.67-14.84 |             |
| Overweight             | 3  | 408   | 2700  | 21.81 | 7.88-40.15  |             |
| Obesity                | 4  | 376   | 1264  | 44.56 | 13.67-78.01 |             |
| <b>Urban or rural</b>  |    |       |       |       |             | <b>0.75</b> |
| Rural                  | 11 | 4360  | 9751  | 58.38 | 39.7-75.9   |             |
| Urban                  | 6  | 1492  | 6079  | 51.53 | 16.49-85.73 |             |
| <b>Education level</b> |    |       |       |       |             | <b>0.59</b> |
| <12 years              | 4  | 1423  | 7954  | 47.79 | 10.19-86.96 |             |
| >12 years              | 3  | 138   | 878   | 31.59 | 3.1-71.35   |             |

Supplementary Table 8. Subgroup analysis and risk factors for Irritability

| Subgroup       | Studies | Event | Total | Prevalence (%) | 95% CI (%)  | P value         |
|----------------|---------|-------|-------|----------------|-------------|-----------------|
| <b>Country</b> |         |       |       |                |             | <b>&lt;0.01</b> |
| Nepal          | 7       | 1772  | 4386  | 45.14          | 26.18-64.86 |                 |
| Nigeria        | 6       | 893   | 2487  | 40.66          | 21.39-61.55 |                 |
| Iran           | 5       | 2235  | 3153  | 71.53          | 48.04-90.09 |                 |
| Ethiopia       | 1       | 102   | 226   | 45.13          | 38.68-51.67 |                 |
| Turkey         | 7       | 1757  | 2796  | 71.66          | 59.38-82.51 |                 |
| Saudi          | 6       | 1732  | 2271  | 76.22          | 55.11-92.16 |                 |
| UK             | 3       | 989   | 2026  | 50.62          | 38.74-62.45 |                 |
| France         | 2       | 411   | 900   | 44.18          | 34.55-54.03 |                 |
| Germany        | 3       | 1590  | 2789  | 49.38          | 33.81-65.02 |                 |
| Belgium        | 1       | 309   | 594   | 52.02          | 48-56.03    |                 |
| Netherlands    | 2       | 471   | 901   | 50.08          | 36.35-63.8  |                 |
| Switzerland    | 2       | 360   | 901   | 35.59          | 14.45-60.2  |                 |
| Spain          | 5       | 5652  | 13600 | 41.5           | 35.31-47.83 |                 |
| India          | 17      | 1882  | 4295  | 46.71          | 34.3-59.34  |                 |
| Australia      | 5       | 2041  | 3720  | 60.94          | 46.64-74.35 |                 |
| Japan          | 5       | 2655  | 5666  | 47.31          | 27.73-67.33 |                 |
| Oman           | 1       | 186   | 472   | 39.41          | 35.04-43.86 |                 |
| Macau, China   | 1       | 345   | 442   | 78.05          | 74.07-81.8  |                 |
| Ecuador        | 4       | 617   | 1293  | 48.73          | 27.72-69.97 |                 |
| Peru           | 1       | 589   | 771   | 76.39          | 73.33-79.33 |                 |
| Malaysia       | 5       | 522   | 1014  | 58.01          | 44.53-70.92 |                 |
| China          | 11      | 6273  | 16804 | 53.63          | 43.64-63.47 |                 |



|                          |    |       |       |       |                 |
|--------------------------|----|-------|-------|-------|-----------------|
| Sri Lanka                | 2  | 335   | 1033  | 35.94 | 13.85-61.76     |
| Brazil                   | 2  | 1262  | 1626  | 76.38 | 71.12-81.28     |
| Pakistan                 | 4  | 2581  | 3549  | 54.11 | 25.08-81.72     |
| Greece                   | 1  | 482   | 1025  | 47.02 | 43.97-50.09     |
| the Philippines          | 1  | 161   | 195   | 82.56 | 76.9-87.59      |
| Republic of<br>Indonesia | 3  | 295   | 622   | 40    | 12.25-71.79     |
| Korea                    | 2  | 1603  | 2578  | 62.24 | 60.35-64.11     |
| Taiwan                   | 4  | 12202 | 21424 | 46.13 | 35.59-56.85     |
| Thailand                 | 2  | 199   | 300   | 68.27 | 24.19-98.23     |
| Vietnam                  | 1  | 98    | 100   | 98    | 94.07-99.97     |
| Italy                    | 1  | 99    | 301   | 32.89 | 27.69-38.31     |
| Poland                   | 1  | 134   | 349   | 38.4  | 33.35-43.56     |
| Iraq                     | 1  | 206   | 342   | 60.23 | 54.99-65.37     |
| USA                      | 4  | 692   | 1482  | 55.83 | 38.64-72.34     |
| Egypt                    | 5  | 2071  | 3704  | 58.59 | 40.05-75.95     |
| Bangladesh               | 4  | 692   | 1369  | 53.29 | 35.77-70.4      |
| Cambodia                 | 1  | 152   | 177   | 85.88 | 80.32-90.65     |
| Sweden                   | 1  | 64    | 108   | 59.26 | 49.82-68.37     |
| New Zealand              | 1  | 1060  | 3616  | 29.31 | 27.84-30.81     |
| South Africa             | 1  | 40    | 63    | 63.49 | 51.16-75.01     |
| Morocco                  | 1  | 126   | 299   | 42.14 | 36.59-47.79     |
| Singapore                | 1  | 195   | 656   | 29.73 | 26.29-33.28     |
| Hong Kong                | 1  | 107   | 150   | 71.33 | 63.81-78.31     |
| Portugue                 | 1  | 368   | 728   | 50.55 | 46.92-54.18     |
| Mexico                   | 1  | 2465  | 4548  | 54.2  | 52.75-55.65     |
| Jordan                   | 1  | 87    | 143   | 60.84 | 52.69-68.7      |
| Lebanon                  | 1  | 187   | 271   | 69    | 63.36-74.38     |
| <b>Continent</b>         |    |       |       |       | <b>0.01</b>     |
| Asia                     | 94 | 38459 | 74208 | 56.72 | 51.77-61.61     |
| Africa                   | 14 | 3232  | 6779  | 49.1  | 37.54-60.71     |
| Europe                   | 23 | 10929 | 24222 | 45.47 | 41.43-49.54     |
| Oceania                  | 6  | 3101  | 7336  | 55.64 | 39.82-70.89     |
| South America            | 7  | 2468  | 3690  | 60.92 | 44.72-75.98     |
| North America            | 5  | 3157  | 6030  | 55.44 | 42.18-68.31     |
| <b>Income level</b>      |    |       |       |       | <b>&lt;0.01</b> |
| Lower-Middle-<br>Income  | 58 | 13480 | 25640 | 52.24 | 45.32-59.12     |
| Low-Income               | 1  | 102   | 226   | 45.13 | 38.68-51.67     |
| Upper-Middle-<br>Income  | 37 | 14362 | 30142 | 61.3  | 55.55-66.9      |
| High-Income              | 53 | 33402 | 66257 | 51.98 | 46.94-57        |

|                              |                |              |              |                       |                   |  |                 |
|------------------------------|----------------|--------------|--------------|-----------------------|-------------------|--|-----------------|
| <b>Development status</b>    |                |              |              |                       |                   |  | 0.55            |
| Developing                   | 95             | 39624        | 76418        | 55.13                 | 50.3-59.92        |  |                 |
| Developed                    | 54             | 21722        | 45847        | 52.99                 | 47.97-57.99       |  |                 |
| <b>Publication date</b>      |                |              |              |                       |                   |  | <b>0.01</b>     |
| Before 2011                  | 72             | 18892        | 46682        | 49.72                 | 44.99-54.44       |  |                 |
| After 2011                   | 77             | 42454        | 75583        | 58.66                 | 53.54-63.69       |  |                 |
| <b>Study size</b>            |                |              |              |                       |                   |  | 0.14            |
| <1000                        | 122            | 22333        | 41339        | 55.58                 | 51.57-59.55       |  |                 |
| >1000                        | 27             | 39013        | 80926        | 49.01                 | 41.42-56.63       |  |                 |
| <b>Study quality</b>         |                |              |              |                       |                   |  | 0.32            |
| <8                           | 21             | 7870         | 16587        | 50.02                 | 40.83-59.20       |  |                 |
| ≥8                           | 128            | 53476        | 105678       | 55.08                 | 51.21-58.93       |  |                 |
| <b>Diagnosis criteria</b>    |                |              |              |                       |                   |  | <b>&lt;0.01</b> |
| MRS                          | 62             | 22422        | 37548        | 60.59                 | 54.98-66.06       |  |                 |
| Face-to-face interview       | 33             | 8136         | 22164        | 45.57                 | 38.94-52.28       |  |                 |
| Others                       | 33             | 18299        | 34611        | 55.06                 | 46.8-63.19        |  |                 |
| The Greene Climacteric Scale | 12             | 4631         | 10479        | 48.48                 | 41.52-55.48       |  |                 |
| SMI                          | 2              | 636          | 2338         | 26.38                 | 7.6-51.38         |  |                 |
| MENQOL                       | 2              | 241          | 426          | 57.8                  | 47.49-67.77       |  |                 |
| KMI                          | 5              | 6981         | 14699        | 54.61                 | 38.76-70          |  |                 |
| <b>Risk factors</b>          | <b>Studies</b> | <b>Event</b> | <b>Total</b> | <b>Prevalence (%)</b> | <b>95% CI (%)</b> |  | <b>P value</b>  |
| <b>Menopausal stage</b>      |                |              |              |                       |                   |  | 0.10            |
| Premenopause                 | 34             | 6347         | 15718        | 45.2                  | 36.83-53.7        |  |                 |
| Perimenopause                | 39             | 8530         | 17061        | 57.3                  | 50.21-64.24       |  |                 |
| Postmenopause                | 63             | 20095        | 41526        | 53.74                 | 47.4-60.03        |  |                 |
| <b>Age</b>                   |                |              |              |                       |                   |  | 0.69            |
| <50                          | 5              | 201          | 535          | 39.62                 | 31.42-48.12       |  |                 |
| ≥50                          | 11             | 1855         | 5084         | 44.28                 | 24.43-65.13       |  |                 |
| <b>Urban or rural</b>        |                |              |              |                       |                   |  | 0.15            |
| Rural                        | 10             | 4883         | 9626         | 43.02                 | 27.9-58.83        |  |                 |
| Urban                        | 4              | 4180         | 8192         | 73.63                 | 34.66-98.25       |  |                 |

Supplementary Table 9. Subgroup analysis and risk factors for **Mood Swings**

| <b>Subgroup</b> | <b>Studies</b> | <b>Event</b> | <b>Total</b> | <b>Prevalence (%)</b> | <b>95% CI (%)</b> | <b>P value</b>  |
|-----------------|----------------|--------------|--------------|-----------------------|-------------------|-----------------|
| <b>Country</b>  |                |              |              |                       |                   | <b>&lt;0.01</b> |
| China           | 11             | 18671        | 46285        | 47.04                 | 37.96-56.23       |                 |
| UK              | 4              | 2495         | 5302         | 48.4                  | 39.08-57.76       |                 |
| France          | 2              | 411          | 900          | 42.47                 | 24.72-61.29       |                 |
| Germany         | 2              | 448          | 896          | 46.55                 | 26.66-67.03       |                 |

|                           |    |       |       |       |             |        |
|---------------------------|----|-------|-------|-------|-------------|--------|
| Belgium                   | 2  | 392   | 673   | 60.8  | 51.24-69.96 |        |
| Netherlands               | 2  | 474   | 901   | 50.59 | 37.8-63.35  |        |
| Switzerland               | 2  | 444   | 901   | 45.97 | 26.95-65.61 |        |
| Spain                     | 1  | 342   | 600   | 57    | 53.02-60.94 |        |
| India                     | 6  | 1005  | 2160  | 48.62 | 23.67-73.94 |        |
| Malaysia                  | 3  | 250   | 450   | 59.32 | 48.08-70.11 |        |
| the Philippines           | 1  | 138   | 195   | 70.77 | 64.17-76.96 |        |
| Republic of<br>Indonesia  | 1  | 23    | 59    | 38.98 | 26.86-51.81 |        |
| Korea                     | 1  | 61    | 97    | 62.89 | 53-72.26    |        |
| Pakistan                  | 2  | 528   | 921   | 57.38 | 54.15-60.58 |        |
| Taiwan                    | 2  | 166   | 381   | 43.55 | 38.58-48.59 |        |
| Thailand                  | 2  | 163   | 300   | 54.46 | 31.72-76.26 |        |
| Vietnam                   | 1  | 96    | 100   | 96    | 91.09-99.13 |        |
| Italy                     | 2  | 432   | 1329  | 32.49 | 30-35.04    |        |
| Poland                    | 2  | 393   | 590   | 70.02 | 40.6-92.46  |        |
| Iran                      | 1  | 91    | 1397  | 6.51  | 5.28-7.87   |        |
| USA                       | 3  | 2567  | 10192 | 32.61 | 18.69-48.3  |        |
| Iraq                      | 1  | 207   | 500   | 41.4  | 37.11-45.75 |        |
| Multi                     | 1  | 1619  | 3520  | 45.99 | 44.35-47.64 |        |
| Hong Kong                 | 1  | 117   | 150   | 78    | 70.99-84.3  |        |
| Portugal                  | 1  | 381   | 728   | 52.34 | 48.7-55.96  |        |
| Belarus                   | 1  | 100   | 119   | 84.03 | 76.86-90.12 |        |
| Greece                    | 1  | 60    | 100   | 60    | 50.19-69.42 |        |
| Nepal                     | 2  | 339   | 2180  | 9.08  | 0.54-25.8   |        |
| <b>Continent</b>          |    |       |       |       |             | 0.09   |
| Asia                      | 35 | 21855 | 55175 | 48.66 | 40.35-57.01 |        |
| Europe                    | 22 | 6372  | 13039 | 52.06 | 45.76-58.32 |        |
| North America             | 3  | 2567  | 10192 | 32.61 | 18.69-48.3  |        |
| Multi                     | 1  | 1619  | 3520  | 45.99 | 44.35-47.64 |        |
| <b>Income level</b>       |    |       |       |       |             | 0.77   |
| Upper-Middle-<br>Income   | 18 | 19391 | 47654 | 51.63 | 43.96-59.26 |        |
| High-Income               | 29 | 10802 | 27260 | 49.27 | 43.91-54.63 |        |
| Lower-Middle-<br>Income   | 14 | 2220  | 7012  | 44.84 | 26.8-63.61  |        |
| <b>Development status</b> |    |       |       |       |             | 0.31   |
| Developing                | 30 | 21427 | 54478 | 46.08 | 36.93-55.38 |        |
| Developed                 | 31 | 10986 | 27448 | 51.77 | 46.12-57.4  |        |
| <b>Publication date</b>   |    |       |       |       |             | 0.5452 |
| Before 2011               | 35 | 5926  | 12864 | 50.55 | 44.15-56.94 |        |
| After 2011                | 26 | 26487 | 69062 | 47.06 | 37.85-56.37 |        |

|                           |                |              |              |                       |                   |                 |
|---------------------------|----------------|--------------|--------------|-----------------------|-------------------|-----------------|
| <b>Study size</b>         |                |              |              |                       |                   | <b>&lt;0.01</b> |
| <1000                     | 47             | 8071         | 16130        | 52.87                 | 46.92-58.77       |                 |
| >1000                     | 17             | 24342        | 65796        | 36.76                 | 27.26-46.8        |                 |
| <b>Study quality</b>      |                |              |              |                       |                   | <b>0.09</b>     |
| <8                        | 5              | 12459        | 37378        | 30.46                 | 11.58-53.64       |                 |
| ≥8                        | 56             | 19954        | 44548        | 50.76                 | 45.43-56.08       |                 |
| <b>Diagnosis criteria</b> |                |              |              |                       |                   | <b>0.38</b>     |
| KMI                       | 9              | 18341        | 45737        | 44.2                  | 34.17-54.47       |                 |
| Face-to-face interview    | 25             | 6822         | 19789        | 45.22                 | 36.5-54.09        |                 |
| Others                    | 25             | 6509         | 14896        | 54.18                 | 45.68-62.57       |                 |
| MRS                       | 2              | 741          | 1504         | 56.6                  | 17.58-91.26       |                 |
| <b>Risk factors</b>       | <b>Studies</b> | <b>Event</b> | <b>Total</b> | <b>Prevalence (%)</b> | <b>95% CI (%)</b> | <b>P value</b>  |
| <b>Menopausal stage</b>   |                |              |              |                       |                   | <b>0.18</b>     |
| Premenopause              | 6              | 5862         | 18272        | 34.61                 | 23.52-46.61       |                 |
| Perimenopause             | 8              | 3752         | 8660         | 42.21                 | 26.61-58.64       |                 |
| Postmenopause             | 17             | 8409         | 19316        | 49.55                 | 39.06-60.07       |                 |

Supplementary Table 10. Subgroup analysis and risk factors for **Poor memory or forgetfulness**

| <b>Subgroup</b>       | <b>Studies</b> | <b>Event</b> | <b>Total</b> | <b>Prevalence (%)</b> | <b>95% CI (%)</b> | <b>P value</b>  |
|-----------------------|----------------|--------------|--------------|-----------------------|-------------------|-----------------|
| <b>Country</b>        |                |              |              |                       |                   | <b>&lt;0.01</b> |
| India                 | 14             | 1477         | 3118         | 43.82                 | 30.91-57.16       |                 |
| Iran                  | 5              | 1656         | 4060         | 44.64                 | 21.55-69.03       |                 |
| China                 | 4              | 926          | 1539         | 59.3                  | 43.11-74.53       |                 |
| Malaysia              | 2              | 216          | 300          | 72.34                 | 67.02-77.38       |                 |
| Korea                 | 3              | 1853         | 2441         | 73.95                 | 62.89-83.66       |                 |
| Japan                 | 2              | 2319         | 3030         | 77.57                 | 70.61-83.83       |                 |
| Singapore             | 1              | 223          | 495          | 45.05                 | 40.69-49.45       |                 |
| the Philippines       | 1              | 166          | 195          | 85.13                 | 79.76-89.8        |                 |
| Republic of Indonesia | 1              | 43           | 59           | 72.88                 | 60.74-83.56       |                 |
| Pakistan              | 3              | 657          | 1229         | 55.65                 | 22.6-86.13        |                 |
| Taiwan                | 2              | 14021        | 20963        | 66.99                 | 66.34-67.63       |                 |
| Thailand              | 1              | 123          | 150          | 82                    | 75.41-87.77       |                 |
| Vietnam               | 1              | 99           | 100          | 99                    | 95.76-100         |                 |
| UK                    | 3              | 1979         | 4631         | 39.04                 | 31.08-47.29       |                 |
| Ecuador               | 1              | 262          | 325          | 80.62                 | 76.13-84.74       |                 |
| Qatar                 | 1              | 308          | 1158         | 26.6                  | 24.09-29.18       |                 |
| United Arab Emirates  | 1              | 98           | 390          | 25.13                 | 20.94-29.56       |                 |
| USA                   | 8              | 3833         | 12978        | 46.07                 | 35.23-57.11       |                 |
| Australia             | 4              | 593          | 832          | 73.56                 | 55.5-88.28        |                 |

|                           |    |       |       |       |             |                 |
|---------------------------|----|-------|-------|-------|-------------|-----------------|
| Turkey                    | 1  | 301   | 519   | 58    | 53.72-62.21 |                 |
| Nigeria                   | 2  | 340   | 620   | 56.43 | 33.62-77.89 |                 |
| Iraq                      | 1  | 293   | 500   | 58.6  | 54.25-62.89 |                 |
| Saudi                     | 1  | 29    | 90    | 32.22 | 22.92-42.28 |                 |
| Morocco                   | 1  | 102   | 299   | 34.11 | 28.84-39.59 |                 |
| Portugal                  | 1  | 355   | 728   | 48.76 | 45.14-52.4  |                 |
| Poland                    | 1  | 161   | 241   | 66.8  | 60.72-72.62 |                 |
| Belarus                   | 1  | 63    | 119   | 52.94 | 43.92-61.87 |                 |
| Belgium                   | 1  | 70    | 79    | 88.61 | 80.54-94.81 |                 |
| Greece                    | 1  | 43    | 100   | 43    | 33.42-52.85 |                 |
| Lebanon                   | 1  | 146   | 271   | 53.87 | 47.91-59.78 |                 |
| Brazil                    | 1  | 148   | 211   | 70.14 | 63.78-76.14 |                 |
| Nepal                     | 2  | 466   | 2180  | 15.34 | 4.63-30.68  |                 |
| <b>Continent</b>          |    |       |       |       |             | <b>&lt;0.01</b> |
| Asia                      | 48 | 25420 | 42787 | 53.87 | 46.38-61.27 |                 |
| Europe                    | 8  | 2671  | 5898  | 52.53 | 39.38-65.5  |                 |
| South America             | 2  | 410   | 536   | 75.72 | 64.78-85.2  |                 |
| North America             | 8  | 3833  | 12978 | 46.07 | 35.23-57.11 |                 |
| Oceania                   | 4  | 593   | 832   | 73.56 | 55.5-88.28  |                 |
| Africa                    | 3  | 442   | 919   | 48.92 | 29.62-68.37 |                 |
| <b>Income level</b>       |    |       |       |       |             | <b>0.02</b>     |
| Lower-Middle-Income       | 31 | 5152  | 12131 | 48.5  | 38.54-58.52 |                 |
| Upper-Middle-Income       | 12 | 2332  | 3663  | 65.66 | 58.1-72.85  |                 |
| High-Income               | 30 | 25885 | 48156 | 55.98 | 48.4-63.43  |                 |
| <b>Development status</b> |    |       |       |       |             | 0.92            |
| Developing                | 46 | 22035 | 37580 | 54.22 | 46.79-61.56 |                 |
| Developed                 | 27 | 11334 | 26370 | 54.77 | 46.47-62.95 |                 |
| <b>Publication date</b>   |    |       |       |       |             | 0.05            |
| Before 2011               | 38 | 8091  | 15964 | 59.63 | 52.09-66.94 |                 |
| After 2011                | 35 | 25278 | 47986 | 48.79 | 40.96-56.64 |                 |
| <b>Study size</b>         |    |       |       |       |             | 0.41            |
| <1000                     | 63 | 9308  | 16957 | 55.44 | 49.5-61.3   |                 |
| >1000                     | 10 | 24061 | 46993 | 48.31 | 32.73-64.06 |                 |
| <b>Study quality</b>      |    |       |       |       |             | 0.44            |
| <8                        | 8  | 4720  | 12878 | 46.92 | 27.05-67.32 |                 |
| ≥8                        | 65 | 28649 | 51072 | 55.37 | 49.64-61.02 |                 |
| <b>Diagnosis criteria</b> |    |       |       |       |             | <b>&lt;0.01</b> |
| Others                    | 31 | 20504 | 35916 | 56.56 | 47.26-65.63 |                 |
| Face-to-face interview    | 16 | 5052  | 15989 | 40.08 | 30.37-50.21 |                 |

|                                   |                |              |              |                       |                   |                |
|-----------------------------------|----------------|--------------|--------------|-----------------------|-------------------|----------------|
| MENQOL                            | 18             | 4316         | 7079         | 57.96                 | 48.08-67.52       |                |
| The Keio questionnaire            | 2              | 2319         | 3030         | 77.57                 | 70.61-83.83       |                |
| the Midlife Women's Symptom Index | 2              | 391          | 670          | 58.37                 | 54.6-62.09        |                |
| WHAS                              | 2              | 288          | 374          | 80                    | 52.66-97.3        |                |
| KMI                               | 2              | 499          | 892          | 49.35                 | 31.94-66.85       |                |
| <b>Risk factors</b>               | <b>Studies</b> | <b>Event</b> | <b>Total</b> | <b>Prevalence (%)</b> | <b>95% CI (%)</b> | <b>P value</b> |
| <b>Menopausal stage</b>           |                |              |              |                       |                   | 0.16           |
| Premenopause                      | 13             | 4959         | 8116         | 48.18                 | 34.54-61.96       |                |
| Perimenopause                     | 13             | 5068         | 7854         | 64.39                 | 55.37-72.94       |                |
| Postmenopause                     | 25             | 12375        | 20004        | 59.3                  | 51.83-66.57       |                |
| <b>Urban or rural</b>             |                |              |              |                       |                   | <0.01          |
| Rural                             | 8              | 644          | 1502         | 49.3                  | 32.9-65.77        |                |
| Urban                             | 1              | 245          | 299          | 81.94                 | 77.36-86.11       |                |

Supplementary Table 11. Subgroup analysis and risk factors for **Difficulty concentrating**

| <b>Subgroup</b>       | <b>Studies</b> | <b>Event</b> | <b>Total</b> | <b>Prevalence (%)</b> | <b>95% CI (%)</b> | <b>P value</b> |
|-----------------------|----------------|--------------|--------------|-----------------------|-------------------|----------------|
| <b>Country</b>        |                |              |              |                       |                   | <0.01          |
| India                 | 10             | 787          | 2896         | 22.68                 | 11.36-36.49       |                |
| Australia             | 5              | 1583         | 2760         | 54.35                 | 29.67-77.95       |                |
| Japan                 | 2              | 1601         | 2258         | 69.25                 | 54.28-82.39       |                |
| Pakistan              | 2              | 429          | 858          | 50.44                 | 45.62-55.26       |                |
| China                 | 5              | 2538         | 11156        | 33.35                 | 23.59-43.89       |                |
| Malaysia              | 2              | 267          | 350          | 70.68                 | 50.63-87.39       |                |
| Greece                | 2              | 430          | 1125         | 38.17                 | 35.34-41.05       |                |
| the Philippines       | 1              | 133          | 195          | 68.21                 | 61.48-74.57       |                |
| Republic of Indonesia | 1              | 29           | 59           | 49.15                 | 36.4-61.96        |                |
| Korea                 | 1              | 72           | 97           | 74.23                 | 65.01-82.49       |                |
| Taiwan                | 1              | 40           | 81           | 49.38                 | 38.5-60.3         |                |
| Thailand              | 2              | 203          | 298          | 68.14                 | 62.71-73.33       |                |
| Vietnam               | 1              | 97           | 100          | 97                    | 92.53-99.62       |                |
| Poland                | 2              | 249          | 590          | 45.06                 | 13.79-78.71       |                |
| USA                   | 5              | 713          | 2050         | 44.21                 | 26.65-62.55       |                |
| Egypt                 | 1              | 371          | 450          | 82.44                 | 78.78-85.83       |                |
| Nigeria               | 1              | 51           | 186          | 27.42                 | 21.23-34.07       |                |
| Bangladesh            | 1              | 113          | 150          | 75.33                 | 68.09-81.93       |                |
| Iraq                  | 1              | 269          | 500          | 53.8                  | 49.41-58.16       |                |
| South Africa          | 1              | 38           | 63           | 60.32                 | 47.9-72.11        |                |
| Morocco               | 1              | 54           | 299          | 18.06                 | 13.89-22.64       |                |

|                              |                |              |              |                       |                   |                 |
|------------------------------|----------------|--------------|--------------|-----------------------|-------------------|-----------------|
| Singapore                    | 1              | 190          | 656          | 28.96                 | 25.55-32.5        |                 |
| Belarus                      | 1              | 48           | 119          | 40.34                 | 31.67-49.32       |                 |
| Belgium                      | 1              | 56           | 79           | 70.89                 | 60.33-80.44       |                 |
| Ecuador                      | 1              | 335          | 385          | 87.01                 | 83.46-90.2        |                 |
| UK                           | 1              | 71           | 254          | 27.95                 | 22.59-33.65       |                 |
| Lebanon                      | 1              | 117          | 271          | 43.17                 | 37.32-49.12       |                 |
| Nepal                        | 2              | 134          | 2180         | 3.98                  | 0.62-9.88         |                 |
| <b>Continent</b>             |                |              |              |                       |                   | <b>&lt;0.01</b> |
| Asia                         | 34             | 7019         | 22105        | 42.09                 | 32.43-52.07       |                 |
| Oceania                      | 5              | 1583         | 2760         | 54.35                 | 29.67-77.95       |                 |
| Europe                       | 7              | 854          | 2167         | 43.8                  | 31.69-56.3        |                 |
| North America                | 5              | 713          | 2050         | 44.21                 | 26.65-62.55       |                 |
| Africa                       | 4              | 514          | 998          | 46.84                 | 17.92-76.97       |                 |
| South America                | 1              | 335          | 385          | 87.01                 | 83.46-90.2        |                 |
| <b>Income level</b>          |                |              |              |                       |                   | <b>0.13</b>     |
| Lower-Middle-Income          | 22             | 2315         | 7644         | 35.31                 | 22.63-49.14       |                 |
| High-Income                  | 21             | 5005         | 9950         | 50.1                  | 40.92-59.29       |                 |
| Upper-Middle-Income          | 13             | 3698         | 12871        | 52.77                 | 40.92-64.47       |                 |
| <b>Development status</b>    |                |              |              |                       |                   | <b>0.12</b>     |
| Developing                   | 33             | 5738         | 20127        | 40.38                 | 30.39-50.79       |                 |
| Developed                    | 23             | 5280         | 10338        | 51.29                 | 42.42-60.13       |                 |
| <b>Publication date</b>      |                |              |              |                       |                   | <b>0.04</b>     |
| Before 2011                  | 34             | 8714         | 22590        | 50.76                 | 41.89-59.6        |                 |
| After 2011                   | 22             | 2304         | 7875         | 35.86                 | 25.25-47.22       |                 |
| <b>Study size</b>            |                |              |              |                       |                   | <b>0.5</b>      |
| <1000                        | 52             | 7402         | 16393        | 45.78                 | 38.45-53.2        |                 |
| >1000                        | 4              | 3616         | 14072        | 33.22                 | 7.65-65.98        |                 |
| <b>Study quality</b>         |                |              |              |                       |                   | <b>0.85</b>     |
| <8                           | 7              | 2065         | 3730         | 42.61                 | 19.24-67.86       |                 |
| ≥8                           | 49             | 8953         | 26735        | 45.16                 | 37.72-52.71       |                 |
| <b>Diagnosis criteria</b>    |                |              |              |                       |                   | <b>&lt;0.01</b> |
| Others                       | 30             | 3281         | 9407         | 45.86                 | 36.22-55.66       |                 |
| The Greene Climacteric Scale | 10             | 3997         | 6639         | 58.27                 | 47.05-69.08       |                 |
| Face-to-face interview       | 12             | 3174         | 13153        | 28.48                 | 14.67-44.74       |                 |
| WHAS                         | 2              | 258          | 374          | 71.84                 | 42.92-93.36       |                 |
| KMI                          | 2              | 308          | 892          | 36.25                 | 28.97-43.86       |                 |
| <b>Risk factors</b>          | <b>Studies</b> | <b>Event</b> | <b>Total</b> | <b>Prevalence (%)</b> | <b>95% CI (%)</b> | <b>P value</b>  |

| <b>Menopausal stage</b> |    |      |      |       |             | 0.26 |
|-------------------------|----|------|------|-------|-------------|------|
| Premenopause            | 7  | 797  | 4242 | 26.14 | 8.34-49.34  |      |
| Perimenopause           | 7  | 998  | 3041 | 50.41 | 32.26-68.51 |      |
| Postmenopause           | 11 | 1945 | 5997 | 43.75 | 27.07-61.19 |      |

Supplementary Table 12. Subgroup analysis and risk factors for **Formication**

| <b>Subgroup</b>           | <b>Studies</b> | <b>Event</b> | <b>Total</b> | <b>Prevalence (%)</b> | <b>95% CI (%)</b> | <b>P value</b>  |
|---------------------------|----------------|--------------|--------------|-----------------------|-------------------|-----------------|
| <b>Country</b>            |                |              |              |                       |                   | <b>&lt;0.01</b> |
| China                     | 14             | 7619         | 51606        | 17.13                 | 12.61-22.19       |                 |
| USA                       | 1              | 30           | 139          | 21.58                 | 15.11-28.84       |                 |
| Egypt                     | 1              | 340          | 450          | 75.56                 | 71.47-79.42       |                 |
| <b>Continent</b>          |                |              |              |                       |                   | <b>&lt;0.01</b> |
| Asia                      | 14             | 7619         | 51606        | 17.13                 | 12.61-22.19       |                 |
| North America             | 1              | 30           | 139          | 21.58                 | 15.11-28.84       |                 |
| Africa                    | 1              | 340          | 450          | 75.56                 | 71.47-79.42       |                 |
| <b>Income level</b>       |                |              |              |                       |                   | <b>&lt;0.01</b> |
| Upper-Middle-Income       | 14             | 7619         | 51606        | 17.13                 | 12.61-22.19       |                 |
| High-Income               | 1              | 30           | 139          | 21.58                 | 15.11-28.84       |                 |
| Lower-Middle-Income       | 1              | 340          | 450          | 75.56                 | 71.47-79.42       |                 |
| <b>Development status</b> |                |              |              |                       |                   | 0.81            |
| Developing                | 15             | 7959         | 52056        | 20.43                 | 12.97-29.09       |                 |
| Developed                 | 1              | 30           | 139          | 21.58                 | 15.11-28.84       |                 |
| <b>Publication date</b>   |                |              |              |                       |                   | <b>&lt;0.01</b> |
| Before 2011               | 1              | 340          | 450          | 75.56                 | 71.47-79.42       |                 |
| After 2011                | 15             | 7649         | 51745        | 17.39                 | 13.07-22.18       |                 |
| <b>Study size</b>         |                |              |              |                       |                   | 0.19            |
| <1000                     | 5              | 629          | 2108         | 30.47                 | 11.53-53.69       |                 |
| >1000                     | 11             | 7360         | 50087        | 16.58                 | 11.23-22.73       |                 |
| <b>Study quality</b>      |                |              |              |                       |                   | 0.07            |
| <8                        | 3              | 2549         | 28387        | 12.08                 | 6.16-19.65        |                 |
| ≥8                        | 13             | 5440         | 23808        | 22.71                 | 14.22-32.52       |                 |
| <b>Diagnosis criteria</b> |                |              |              |                       |                   | 0.23            |
| KMI                       | 14             | 7619         | 51606        | 17.13                 | 12.61-22.19       |                 |
| Face-to-face interview    | 2              | 370          | 589          | 48.49                 | 4.31-94.35        |                 |
| <b>Risk factors</b>       | <b>Studies</b> | <b>Event</b> | <b>Total</b> | <b>Prevalence (%)</b> | <b>95% CI (%)</b> | <b>P value</b>  |
| <b>Menopausal stage</b>   |                |              |              |                       |                   | 0.23            |
| Premenopause              | 4              | 1526         | 17197        | 10.58                 | 5.23-17.51        |                 |
| Perimenopause             | 5              | 1184         | 8141         | 16.15                 | 10.19-23.18       |                 |
| Postmenopause             | 5              | 1764         | 10820        | 22.8                  | 9.49-39.75        |                 |



Supplementary Table 13. Subgroup analysis and risk factors for **Change in the appearance, texture, or tone of my skin**

| <b>Subgroup</b>           | <b>Studies</b> | <b>Event</b> | <b>Total</b> | <b>Prevalence (%)</b> | <b>95% CI (%)</b> | <b>P value</b>  |
|---------------------------|----------------|--------------|--------------|-----------------------|-------------------|-----------------|
| <b>Country</b>            |                |              |              |                       |                   | <b>&lt;0.01</b> |
| Korea                     | 1              | 1438         | 1774         | 81.06                 | 79.2-82.85        |                 |
| India                     | 7              | 637          | 1492         | 49.86                 | 36.15-63.57       |                 |
| Turkey                    | 1              | 287          | 874          | 32.84                 | 29.76-35.99       |                 |
| Iran                      | 2              | 538          | 902          | 40.13                 | 0-95.98           |                 |
| Ecuador                   | 1              | 232          | 325          | 71.38                 | 66.34-76.18       |                 |
| Qatar                     | 1              | 286          | 1158         | 24.7                  | 22.25-27.22       |                 |
| United Arab Emirates      | 1              | 96           | 390          | 24.62                 | 20.46-29.02       |                 |
| Australia                 | 3              | 307          | 672          | 45.73                 | 29.17-62.79       |                 |
| Saudi                     | 1              | 31           | 90           | 34.44                 | 24.93-44.61       |                 |
| <b>Continent</b>          |                |              |              |                       |                   | <b>&lt;0.01</b> |
| Asia                      | 14             | 3313         | 6680         | 44.8                  | 32.57-57.35       |                 |
| South America             | 1              | 232          | 325          | 71.38                 | 66.34-76.18       |                 |
| Oceania                   | 3              | 307          | 672          | 45.73                 | 29.17-62.79       |                 |
| <b>Income level</b>       |                |              |              |                       |                   | <b>0.88</b>     |
| High-Income               | 7              | 2158         | 4084         | 43.22                 | 27.34-59.84       |                 |
| Lower-Middle-Income       | 9              | 1175         | 2394         | 47.76                 | 32.31-63.43       |                 |
| Upper-Middle-Income       | 2              | 519          | 1199         | 52.21                 | 16.56-86.59       |                 |
| <b>Development status</b> |                |              |              |                       |                   | <b>0.67</b>     |
| Developing                | 14             | 2001         | 4265         | 47.96                 | 36.86-59.15       |                 |
| Developed                 | 4              | 1851         | 3412         | 41.29                 | 16.14-69.17       |                 |
| <b>Publication date</b>   |                |              |              |                       |                   | <b>0.8</b>      |
| Before 2011               | 6              | 762          | 1739         | 44.75                 | 30.27-59.68       |                 |
| After 2011                | 12             | 3090         | 5938         | 47.35                 | 33.49-61.41       |                 |
| <b>Study size</b>         |                |              |              |                       |                   | <b>0.8</b>      |
| <1000                     | 16             | 2128         | 4745         | 45.57                 | 35.41-55.92       |                 |
| >1000                     | 2              | 1724         | 2932         | 53.5                  | 5.27-97.42        |                 |
| <b>Study quality</b>      |                |              |              |                       |                   | <b>&lt;0.01</b> |
| <8                        | 2              | 1670         | 2099         | 76.63                 | 66.52-85.41       |                 |
| ≥8                        | 16             | 2182         | 5578         | 42.49                 | 32.75-52.53       |                 |
| <b>Risk factors</b>       |                |              |              |                       |                   |                 |
| <b>Menopausal stage</b>   |                |              |              |                       |                   | <b>0.98</b>     |
| Premenopause              | 5              | 853          | 1595         | 44.46                 | 24.68-65.19       |                 |
| Perimenopause             | 6              | 770          | 1548         | 43.8                  | 24.4-64.18        |                 |
| Postmenopause             | 8              | 959          | 2109         | 46.1                  | 31.81-60.72       |                 |

Supplementary Table 14. Subgroup analysis and risk factors for **Increased facial hair**

| <b>Subgroup</b>           | <b>Studies</b> | <b>Event</b> | <b>Total</b> | <b>Prevalence (%)</b> | <b>95% CI (%)</b> | <b>P value</b>  |
|---------------------------|----------------|--------------|--------------|-----------------------|-------------------|-----------------|
| <b>Country</b>            |                |              |              |                       |                   | <b>&lt;0.01</b> |
| India                     | 8              | 421          | 1490         | 28.86                 | 14.86-45.27       |                 |
| Malaysia                  | 1              | 65           | 276          | 23.55                 | 18.72-28.75       |                 |
| Korea                     | 1              | 451          | 1774         | 25.42                 | 23.42-27.48       |                 |
| Turkey                    | 2              | 314          | 1006         | 38.85                 | 18.47-61.49       |                 |
| Iran                      | 3              | 697          | 2299         | 31.16                 | 18.09-45.97       |                 |
| Egypt                     | 1              | 221          | 450          | 49.11                 | 44.49-53.73       |                 |
| Ecuador                   | 1              | 63           | 325          | 19.38                 | 15.26-23.87       |                 |
| Nigeria                   | 1              | 6            | 186          | 3.23                  | 1.08-6.34         |                 |
| Qatar                     | 1              | 186          | 1158         | 16.06                 | 14-18.24          |                 |
| United Arab Emirates      | 1              | 62           | 390          | 15.9                  | 12.43-19.7        |                 |
| Australia                 | 3              | 207          | 672          | 30.42                 | 22.25-39.26       |                 |
| Saudi                     | 1              | 31           | 90           | 34.44                 | 24.93-44.61       |                 |
| Libya                     | 1              | 13           | 86           | 15.12                 | 8.23-23.55        |                 |
| <b>Continent</b>          |                |              |              |                       |                   | <b>0.05</b>     |
| Asia                      | 18             | 2227         | 8483         | 28.47                 | 21.24-36.29       |                 |
| Africa                    | 3              | 240          | 722          | 19.32                 | 1.09-51.18        |                 |
| South America             | 1              | 63           | 325          | 19.38                 | 15.26-23.87       |                 |
| Oceania                   | 3              | 207          | 672          | 30.42                 | 22.25-39.26       |                 |
| <b>Income level</b>       |                |              |              |                       |                   | 0.91            |
| Lower-Middle-Income       | 13             | 1345         | 4425         | 28.2                  | 17.62-40.14       |                 |
| Upper-Middle-Income       | 5              | 455          | 1693         | 26.74                 | 16.22-38.77       |                 |
| High-Income               | 7              | 937          | 4084         | 25.4                  | 19.21-32.12       |                 |
| <b>Development status</b> |                |              |              |                       |                   | 0.21            |
| Developing                | 20             | 1942         | 6514         | 28.4                  | 20.92-36.53       |                 |
| Developed                 | 5              | 795          | 3688         | 22.11                 | 16.33-28.47       |                 |
| <b>Publication date</b>   |                |              |              |                       |                   | 0.8             |
| Before 2011               | 10             | 1015         | 3828         | 26.23                 | 17.14-36.47       |                 |
| After 2011                | 15             | 1722         | 6374         | 27.84                 | 19.67-36.83       |                 |
| <b>Study size</b>         |                |              |              |                       |                   | 0.15            |
| <1000                     | 22             | 1776         | 5873         | 28.05                 | 21.13-35.53       |                 |
| >1000                     | 3              | 961          | 4329         | 21.45                 | 16.1-27.33        |                 |
| <b>Study quality</b>      |                |              |              |                       |                   | 0.28            |
| <8                        | 2              | 514          | 2099         | 22.7                  | 17.14-28.79       |                 |
| ≥8                        | 23             | 2223         | 8103         | 27.64                 | 21-34.8           |                 |
| <b>Diagnosis criteria</b> |                |              |              |                       |                   | 0.72            |

| MENQOL                  | 20             | 2063         | 7937         | 25.67                 | 19.96-31.81       |                |
|-------------------------|----------------|--------------|--------------|-----------------------|-------------------|----------------|
| Others                  | 3              | 129          | 418          | 32.45                 | 3.34-72.95        |                |
| Face-to-face interview  | 2              | 545          | 1847         | 35.54                 | 13.06-62.09       |                |
| <b>Risk factors</b>     | <b>Studies</b> | <b>Event</b> | <b>Total</b> | <b>Prevalence (%)</b> | <b>95% CI (%)</b> | <b>P value</b> |
| <b>Menopausal stage</b> |                |              |              |                       |                   | 0.10           |
| Premenopause            | 6              | 322          | 1655         | 17.99                 | 14.79-21.44       |                |
| Perimenopause           | 8              | 504          | 2318         | 20.31                 | 15.7-25.32        |                |
| Postmenopause           | 11             | 835          | 2982         | 28.27                 | 19.32-38.17       |                |
| <b>Urban or rural</b>   |                |              |              |                       |                   | <0.01          |
| Rural                   | 4              | 92           | 536          | 16.35                 | 1.94-40.18        |                |
| Urban                   | 1              | 135          | 250          | 54                    | 47.79-60.15       |                |

Supplementary Table 15. Subgroup analysis and risk factors for **Drying skin**

| <b>Subgroup</b>      | <b>Studies</b> | <b>Event</b> | <b>Total</b> | <b>Prevalence (%)</b> | <b>95% CI (%)</b> | <b>P value</b> |
|----------------------|----------------|--------------|--------------|-----------------------|-------------------|----------------|
| <b>Country</b>       |                |              |              |                       |                   | <0.01          |
| India                | 10             | 802          | 2123         | 40.43                 | 29.52-51.84       |                |
| Malaysia             | 1              | 159          | 276          | 57.61                 | 51.72-63.39       |                |
| Korea                | 1              | 1487         | 1774         | 83.82                 | 82.07-85.5        |                |
| Spain                | 1              | 573          | 1059         | 54.11                 | 51.1-57.1         |                |
| Singapore            | 1              | 137          | 495          | 27.68                 | 23.82-31.71       |                |
| Turkey               | 2              | 428          | 1006         | 42.03                 | 37.7-46.42        |                |
| Iran                 | 4              | 1064         | 2649         | 42.32                 | 20.18-66.21       |                |
| UK                   | 2              | 938          | 4527         | 22.55                 | 17.39-28.16       |                |
| Egypt                | 1              | 408          | 450          | 90.67                 | 87.79-93.19       |                |
| Ecuador              | 2              | 600          | 776          | 78.85                 | 63.55-90.85       |                |
| Qatar                | 1              | 338          | 1158         | 29.19                 | 26.6-31.84        |                |
| United Arab Emirates | 1              | 113          | 390          | 28.97                 | 24.57-33.58       |                |
| Australia            | 3              | 365          | 672          | 53.24                 | 32.74-73.18       |                |
| Taiwan               | 1              | 11766        | 20882        | 56.35                 | 55.67-57.02       |                |
| Saudi                | 1              | 31           | 90           | 34.44                 | 24.93-44.61       |                |
| Japan                | 1              | 624          | 1069         | 58.37                 | 55.4-61.31        |                |
| Pakistan             | 1              | 74           | 308          | 24.03                 | 19.41-28.97       |                |
| USA                  | 1              | 305          | 1143         | 26.68                 | 24.16-29.29       |                |
| Thailand             | 1              | 120          | 148          | 81.08                 | 74.34-87.02       |                |
| Colombia             | 1              | 1074         | 1739         | 61.76                 | 59.46-64.03       |                |
| China                | 1              | 152          | 296          | 51.35                 | 45.65-57.04       |                |
| Nepal                | 1              | 176          | 2000         | 8.8                   | 7.6-10.08         |                |
| <b>Continent</b>     |                |              |              |                       |                   | <0.01          |
| Asia                 | 28             | 17471        | 34664        | 42.56                 | 34.87-50.43       |                |
| Europe               | 3              | 1511         | 5586         | 32.85                 | 14.71-54.15       |                |

| Africa                    | 1              | 408          | 450          | 90.67                 | 87.79-93.19       |                 |
|---------------------------|----------------|--------------|--------------|-----------------------|-------------------|-----------------|
| South America             | 3              | 1674         | 2515         | 73.39                 | 58.54-85.94       |                 |
| Oceania                   | 3              | 365          | 672          | 53.24                 | 32.74-73.18       |                 |
| North America             | 1              | 305          | 1143         | 26.68                 | 24.16-29.29       |                 |
| <b>Income level</b>       |                |              |              |                       |                   | <b>0.03</b>     |
| Lower-Middle-Income       | 17             | 2524         | 7530         | 40.93                 | 29.54-52.82       |                 |
| Upper-Middle-Income       | 8              | 2533         | 4241         | 62.01                 | 49.42-73.83       |                 |
| High-Income               | 14             | 16677        | 33259        | 43.11                 | 32.63-53.9        |                 |
| <b>Development status</b> |                |              |              |                       |                   | <b>0.32</b>     |
| Developing                | 28             | 17029        | 33049        | 48.25                 | 39.41-57.15       |                 |
| Developed                 | 11             | 4705         | 11981        | 40.5                  | 28.59-53          |                 |
| <b>Publication date</b>   |                |              |              |                       |                   | <b>0.43</b>     |
| Before 2011               | 15             | 3061         | 6978         | 49.92                 | 37.2-62.65        |                 |
| After 2011                | 24             | 18673        | 38052        | 43.62                 | 34.99-52.45       |                 |
| <b>Study size</b>         |                |              |              |                       |                   | <b>0.51</b>     |
| <1000                     | 29             | 4175         | 8536         | 47.61                 | 39.47-55.82       |                 |
| >1000                     | 10             | 17559        | 36494        | 41.59                 | 26.46-57.58       |                 |
| <b>Study quality</b>      |                |              |              |                       |                   | <b>0.01</b>     |
| <8                        | 6              | 2718         | 4191         | 68.91                 | 49.89-85.11       |                 |
| ≥8                        | 33             | 19016        | 40839        | 41.79                 | 34.91-48.85       |                 |
| <b>Diagnosis criteria</b> |                |              |              |                       |                   | <b>&lt;0.01</b> |
| Others                    | 11             | 14758        | 31437        | 38.98                 | 25.06-53.87       |                 |
| MENQOL                    | 20             | 4399         | 8203         | 49.37                 | 40.49-58.28       |                 |
| Face-to-face interview    | 6              | 1181         | 3200         | 41.17                 | 19.63-64.65       |                 |
| CS-10                     | 2              | 1396         | 2190         | 66.47                 | 56.77-75.52       |                 |
| <b>Risk factors</b>       | <b>Studies</b> | <b>Event</b> | <b>Total</b> | <b>Prevalence (%)</b> | <b>95% CI (%)</b> | <b>P value</b>  |
| <b>Menopausal stage</b>   |                |              |              |                       |                   | <b>0.56</b>     |
| Premenopause              | 8              | 3814         | 7418         | 41.65                 | 24.68-59.7        |                 |
| Perimenopause             | 10             | 3986         | 7591         | 53.48                 | 36.69-69.88       |                 |
| Postmenopause             | 16             | 8210         | 14516        | 52.21                 | 43.04-61.31       |                 |
| <b>Urban or rural</b>     |                |              |              |                       |                   | <b>0.45</b>     |
| Rural                     | 4              | 212          | 376          | 60.85                 | 38.12-81.4        |                 |
| Urban                     | 2              | 406          | 549          | 73.84                 | 46.74-93.65       |                 |

**Supplementary Table 16 GRADE approach for assessing the certainty of evidence in the current study.**

| Quality assessment                                                       |                       |                           |                            |                         |                          |                                   | No of participants | Effect           |          | Quality  | Importance |
|--------------------------------------------------------------------------|-----------------------|---------------------------|----------------------------|-------------------------|--------------------------|-----------------------------------|--------------------|------------------|----------|----------|------------|
| No of studies                                                            | Design                | Risk of bias <sup>1</sup> | Inconsistency <sup>1</sup> | Indirectness            | Imprecision <sup>2</sup> | Other considerations <sup>3</sup> |                    | Relative(95% CI) | Absolute |          |            |
| <b>Prevalence of hot flashes in middle-aged women</b>                    |                       |                           |                            |                         |                          |                                   |                    |                  |          |          |            |
| 265                                                                      | observational studies | very serious              | serious                    | no serious indirectness | serious                  | reporting bias strong association | 349,608            | -                | -        | VERY LOW | CRITICAL   |
| <b>Prevalence of sleep problems in middle-aged women</b>                 |                       |                           |                            |                         |                          |                                   |                    |                  |          |          |            |
| 219                                                                      | observational studies | very serious              | serious                    | no serious indirectness | serious                  | reporting bias strong association | 318,656            | -                | -        | VERY LOW | CRITICAL   |
| <b>Prevalence of heart discomfort in middle-aged women</b>               |                       |                           |                            |                         |                          |                                   |                    |                  |          |          |            |
| 135                                                                      | observational studies | very serious              | serious                    | no serious indirectness | serious                  | reporting bias strong association | 170,526            | -                | -        | VERY LOW | CRITICAL   |
| <b>Prevalence of headache in middle-aged women</b>                       |                       |                           |                            |                         |                          |                                   |                    |                  |          |          |            |
| 108                                                                      | observational studies | very serious              | serious                    | no serious indirectness | serious                  | reporting bias strong association | 162,907            | -                | -        | VERY LOW | CRITICAL   |
| <b>Prevalence of joint and muscular discomfort in middle-aged women</b>  |                       |                           |                            |                         |                          |                                   |                    |                  |          |          |            |
| 195                                                                      | observational studies | very serious              | serious                    | no serious indirectness | serious                  | reporting bias strong association | 236,615            | -                | -        | VERY LOW | CRITICAL   |
| <b>Prevalence of physical and mental exhaustion in middle-aged women</b> |                       |                           |                            |                         |                          |                                   |                    |                  |          |          |            |
| 177                                                                      | observational studies | very serious              | serious                    | no serious indirectness | serious                  | reporting bias strong association | 198,507            | -                | -        | VERY LOW | CRITICAL   |
| <b>Prevalence of depression in middle-aged women</b>                     |                       |                           |                            |                         |                          |                                   |                    |                  |          |          |            |
| 204                                                                      | observational studies | very serious              | serious                    | no serious indirectness | serious                  | reporting bias strong association | 300,449            | -                | -        | VERY LOW | CRITICAL   |
| <b>Prevalence of anxiety in middle-aged women</b>                        |                       |                           |                            |                         |                          |                                   |                    |                  |          |          |            |
| 145                                                                      | observational studies | very serious              | serious                    | no serious indirectness | serious                  | reporting bias strong association | 131,236            | -                | -        | VERY LOW | CRITICAL   |
| <b>Prevalence of irritability in middle-aged women</b>                   |                       |                           |                            |                         |                          |                                   |                    |                  |          |          |            |
| 125                                                                      | observational studies | very serious              | serious                    | no serious indirectness | serious                  | reporting bias strong association | 122,265            | -                | -        | VERY LOW | CRITICAL   |
| <b>Prevalence of mood swings in middle-aged women</b>                    |                       |                           |                            |                         |                          |                                   |                    |                  |          |          |            |
| 35                                                                       | observational studies | very serious              | serious                    | no serious indirectness | serious                  | reporting bias strong association | 81,926             | -                | -        | VERY LOW | CRITICAL   |
| <b>Prevalence of sexual problems in middle-aged women</b>                |                       |                           |                            |                         |                          |                                   |                    |                  |          |          |            |
| 156                                                                      | observational studies | very serious              | serious                    | no serious indirectness | serious                  | reporting bias strong association | 180,618            | -                | -        | VERY LOW | CRITICAL   |
| <b>Prevalence of vaginal dryness in middle-aged women</b>                |                       |                           |                            |                         |                          |                                   |                    |                  |          |          |            |
| 155                                                                      | observational studies | very serious              | serious                    | no serious indirectness | serious                  | reporting bias strong association | 167,055            | -                | -        | VERY LOW | CRITICAL   |
| <b>Prevalence of urinary problems in middle-aged women</b>               |                       |                           |                            |                         |                          |                                   |                    |                  |          |          |            |
| 171                                                                      | observational studies | very serious              | serious                    | no serious indirectness | serious                  | reporting bias strong association | 200,250            | -                | -        | VERY LOW | CRITICAL   |
| <b>Prevalence of forgetfulness in middle-aged women</b>                  |                       |                           |                            |                         |                          |                                   |                    |                  |          |          |            |
| 62                                                                       | observational studies | very serious              | serious                    | no serious indirectness | serious                  | reporting bias strong association | 30,465             | -                | -        | VERY LOW | CRITICAL   |

|                                                                                              |                       |              |         |                         |         |                                   |        |   |   |          |          |
|----------------------------------------------------------------------------------------------|-----------------------|--------------|---------|-------------------------|---------|-----------------------------------|--------|---|---|----------|----------|
| <b>Prevalence of difficult concentration in middle-aged women</b>                            |                       |              |         |                         |         |                                   |        |   |   |          |          |
| 44                                                                                           | observational studies | very serious | serious | no serious indirectness | serious | reporting bias strong association | 63,950 | - | - | VERY LOW | CRITICAL |
| <b>Prevalence of formication in middle-aged women</b>                                        |                       |              |         |                         |         |                                   |        |   |   |          |          |
| 16                                                                                           | observational studies | very serious | serious | no serious indirectness | serious | reporting bias strong association | 52,195 | - | - | VERY LOW | CRITICAL |
| <b>Prevalence of change in the appearance, texture, or tone of skin in middle-aged women</b> |                       |              |         |                         |         |                                   |        |   |   |          |          |
| 18                                                                                           | observational studies | very serious | serious | no serious indirectness | serious | reporting bias strong association | 7,677  | - | - | VERY LOW | CRITICAL |
| <b>Prevalence of increased facial hair in middle-aged women</b>                              |                       |              |         |                         |         |                                   |        |   |   |          |          |
| 25                                                                                           | observational studies | very serious | serious | no serious indirectness | serious | reporting bias strong association | 10,202 | - | - | VERY LOW | CRITICAL |
| <b>Prevalence of drying skin in middle-aged women</b>                                        |                       |              |         |                         |         |                                   |        |   |   |          |          |
| 39                                                                                           | observational studies | very serious | serious | no serious indirectness | serious | reporting bias strong association | 45,030 | - | - | VERY LOW | CRITICAL |

<sup>1</sup> menopausal symptoms were diagnosed by a variety of diagnostic tools. More importantly, most studies were cross-sectional studies which may further increase the bias.

<sup>2</sup> The effect is large, and consideration of CIs alone suggests a robust effect, but the total sample size is not large enough and the number of events is small.

<sup>3</sup> The prevalence varied among studies from different countries and regions. Even studies from the same country and region varied a lot.

## Reference

1. Lan Y, Huang Y, Song Y, et al. Prevalence, severity, and associated factors of menopausal symptoms in middle-aged Chinese women: a community-based cross-sectional study in southeast China. *Menopause*. 2017;24(10):1200-1207. doi:10.1097/GME.0000000000000906
2. Adhikari D, Bhurtyal A. Menopausal symptoms among middle-aged women and care providers' readiness to deliver menopausal services: an observational study in Kavrepalanchok, Nepal. *Sex Reprod Health Matters*. 2021;29(2):2141255. doi:10.1080/26410397.2022.2141255
3. Wang X, Wang L, Di J, Zhang X, Zhao G. Prevalence and risk factors for menopausal symptoms in middle-aged Chinese women: a community-based cross-sectional study. *Menopause*. 2021;28(11):1271-1278. Published 2021 Aug 30. doi:10.1097/GME.0000000000001850
4. Yang R, Zhou Y, Li C, Tao M. Association between pulse wave velocity and hot flashes/sweats in middle-aged women. *Sci Rep*. 2017;7(1):13854. Published 2017 Oct 23. doi:10.1038/s41598-017-13395-z
5. Olaolorun FM, Lawoyin TO. Experience of menopausal symptoms by women in an urban community in Ibadan, Nigeria. *Menopause*. 2009;16(4):822-830. doi:10.1097/gme.0b013e318198d6e7
6. Chedraui P, Pérez-López FR, Aguirre W, et al. Beliefs regarding menopausal hot flushes among climacteric women as assessed with the Hot Flush Beliefs Scale. *Maturitas*. 2010;66(3):298-304. doi:10.1016/j.maturitas.2010.03.019
7. Li L, Wu J, Pu D, et al. Factors associated with the age of natural menopause and menopausal symptoms in Chinese women. *Maturitas*. 2012;73(4):354-360. doi:10.1016/j.maturitas.2012.09.008
8. Zagalaz-Anula N, Hita-Contreras F, Martínez-Amat A, et al. The associations between menopausal symptoms and sleep quality in Spanish postmenopausal women. *Climacteric*. 2019;22(5):511-517. doi:10.1080/13697137.2019.1609439
9. Javadi Z, Allahverdipour H, Asghari Jafarabadi M, Emami A. An Interventional strategy of physical activity promotion for reduction of menopause symptoms. *Health Promot Perspect*. 2020;10(4):383-392. Published 2020 Nov 7. doi:10.34172/hpp.2020.57
10. Nagaraj D, Ramesh N, Devraj D, Umman M, John AK, Johnson AR. Experience and Perceptions Regarding Menopause among Rural Women: A Cross-Sectional Hospital-Based Study in South Karnataka. *J Midlife Health*. 2021;12(3):199-205. doi:10.4103/jmh.JMH\_196\_20
11. Yisma E, Eshetu N, Ly S, Dessalegn B. Prevalence and severity of menopause symptoms among perimenopausal and postmenopausal women aged 30-49 years in Gulele sub-city of Addis Ababa, Ethiopia. *BMC Womens Health*. 2017;17(1):124. Published 2017 Dec 8. doi:10.1186/s12905-017-0484-x
12. Korkmaz H, Arslanca T, Tekin E, Kayabaşı B, Akbulut KG. Evaluation of the relationship between plasma viscosity and selected menopausal symptoms using the Menopause Rating Scale. *Menopause*. 2022;29(9):1071-1076. doi:10.1097/GME.0000000000002017
13. AlQuaiz AM, Tayel SA, Habiba FA. Assessment of symptoms of menopause and their severity among Saudi women in Riyadh. *Ann Saudi Med*. 2013;33(1):63-67. doi:10.5144/0256-4947.2013.63
14. Yu Q, Chae HD, Hsiao SM, et al. Prevalence, severity, and associated factors in women in East Asia with moderate-to-severe vasomotor symptoms associated with menopause. *Menopause*. 2022;29(5):553-563. Published 2022 May 1. doi:10.1097/GME.0000000000001949

15. Genazzani AR, Schneider HP, Panay N, Nijland EA. The European Menopause Survey 2005: women's perceptions on the menopause and postmenopausal hormone therapy. *Gynecol Endocrinol.* 2006;22(7):369-375. doi:10.1080/09513590600842463
16. Aaron R, Muliyl J, Abraham S. Medico-social dimensions of menopause: a cross-sectional study from rural south India. *Natl Med J India.* 2002;15(1):14-17.
17. Abdel-Salam DM, Mohamed RA, Alruwaili RR, Alhablani FS, Aldaghmi RM, Alghassab RE. Postmenopausal Symptoms and Their Correlates among Saudi Women Attending Different Primary Health Centers. *Int J Environ Res Public Health.* 2021;18(13):6831. Published 2021 Jun 25. doi:10.3390/ijerph18136831
18. Anderson D, Yoshizawa T, Gollschewski S, Atogami F, Courtney M. Relationship between menopausal symptoms and menopausal status in Australian and Japanese women: preliminary analysis. *Nurs Health Sci.* 2004;6(3):173-180. doi:10.1111/j.1442-2018.2004.00190.x
19. El Shafie K, Al Farsi Y, Al Zadjali N, Al Adawi S, Al Busaidi Z, Al Shafae M. Menopausal symptoms among healthy, middle-aged Omani women as assessed with the Menopause Rating Scale. *Menopause.* 2011;18(10):1113-1119. doi:10.1097/gme.0b013e31821b82ee
20. Aloufi B, Hassanien NS. The Association of Menopausal Symptoms and Social Support Among Saudi Women at Primary Health Care Centers in Taif, Saudi Arabia. *Cureus.* 2022;14(6):e26122. Published 2022 Jun 20. doi:10.7759/cureus.26122
21. Blümel JE, Chedraui P, Baron G, et al. Menopausal symptoms appear before the menopause and persist 5 years beyond: a detailed analysis of a multinational study. *Climacteric.* 2012;15(6):542-551. doi:10.3109/13697137.2012.658462
22. Chou MF, Wun YT, Pang SM. Menopausal symptoms and the menopausal rating scale among midlife chinese women in Macau, China. *Women Health.* 2014;54(2):115-126. doi:10.1080/03630242.2013.871767
23. Fallahzadeh H. Age at natural menopause in Yazd, Islamic Republic of Iran. *Menopause.* 2007;14(5):900-904. doi:10.1097/gme.0b013e318032b2e6
24. Fuh JL, Wang SJ, Lee SJ, Lu SR, Juang KD. Quality of life and menopausal transition for middle-aged women on Kinmen island. *Qual Life Res.* 2003;12(1):53-61. doi:10.1023/a:1022074602928
25. Chedraui P, Pérez-López FR, Hidalgo L, et al. Evaluation of the presence and severity of menopausal symptoms among postmenopausal women screened for the metabolic syndrome. *Gynecol Endocrinol.* 2014;30(12):918-924. doi:10.3109/09513590.2014.971236
26. Chedraui P, Pérez-López FR, Mendoza M, et al. Severe menopausal symptoms in middle-aged women are associated to female and male factors. *Arch Gynecol Obstet.* 2010;281(5):879-885. doi:10.1007/s00404-009-1204-z
27. Ojeda E, Blümel JE, Vallejo MS, Lavín P. Climacteric symptoms in Quechua and Mestizo women from the Andean region of Cusco, Peru: effects of altitude and ethnicity. *Maturitas.* 2014;77(4):356-360. doi:10.1016/j.maturitas.2014.01.011
28. Ikeda T, Makita K, Ishitani K, Takamatsu K, Horiguchi F, Nozawa S. Status of climacteric symptoms among middle-aged to elderly Japanese women: comparison of general healthy women with women presenting at a menopausal clinic. *J Obstet Gynaecol Res.* 2005;31(2):164-171. doi:10.1111/j.1341-8076.2005.00268.x
29. Ishizuka B, Kudo Y, Tango T. Cross-sectional community survey of menopause symptoms among



- Japanese women. *Maturitas*. 2008;61(3):260-267. doi:10.1016/j.maturitas.2008.07.006
30. Kapur P, Sinha B, Pereira BM. Measuring climacteric symptoms and age at natural menopause in an Indian population using the Greene Climacteric Scale. *Menopause*. 2009;16(2):378-384. doi:10.1097/gme.0b013e31818a2be9
31. Sharma S, Adhikari L, Karmacharya I, Kaphle M. Menopausal Symptoms among Postmenopausal Women of a Selected Municipality: A Cross-sectional Survey. *JNMA J Nepal Med Assoc*. 2021;59(243):1155-1160. Published 2021 Nov 15. doi:10.31729/jnma.7052
32. Qazi RA. Age, pattern of menopause, climacteric symptoms and associated problems among urban population of Hyderabad, Pakistan. *J Coll Physicians Surg Pak*. 2006;16(11):700-703.
33. Rahman SA, Zainudin SR, Mun VL. Assessment of menopausal symptoms using modified Menopause Rating Scale (MRS) among middle age women in Kuching, Sarawak, Malaysia. *Asia Pac Fam Med*. 2010;9(1):5. Published 2010 Feb 22. doi:10.1186/1447-056X-9-5
34. Shea JL. Chinese women's symptoms: relation to menopause, age and related attitudes. *Climacteric*. 2006;9(1):30-39. doi:10.1080/13697130500499914
35. Som N, Ray S. Menopause-specific quality of life of urban women in West Bengal, India. *Menopause Int*. 2012;18(3):99-105. doi:10.1258/mi.2012.011107
36. Syed Alwi SA, Lee PY, Awi I, Mallik PS, Md Haizal MN. The menopausal experience among indigenous women of Sarawak, Malaysia. *Climacteric*. 2009;12(6):548-556. doi:10.3109/13697130902919519
37. Waidyasekera H, Wijewardena K, Lindmark G, Naessen T. Menopausal symptoms and quality of life during the menopausal transition in Sri Lankan women. *Menopause*. 2009;16(1):164-170. doi:10.1097/gme.0b013e31817a8abd
38. Tomida M, Otsuka R, Tange C, et al. Vasomotor symptoms, sleep problems, and depressive symptoms in community-dwelling Japanese women. *J Obstet Gynaecol Res*. 2021;47(10):3677-3690. doi:10.1111/jog.14937
39. He Y, Tian J, Oddy WH, et al. The associations of childhood adiposity with menopausal symptoms in women aged 45-49 years: An Australian Cohort Study. *Maturitas*. 2021;143:81-88. doi:10.1016/j.maturitas.2020.09.008
40. Kumari A, Panigrahi A, Roy A, Panda J. Impaired Quality of Life and Its Determinants among Postmenopausal Women of Slum Communities in Bhubaneswar, India. *J Midlife Health*. 2020;11(3):149-155. doi:10.4103/jmh.JMH\_111\_19
41. Malacara JM, Canto de Cetina T, Bassol S, et al. Symptoms at pre- and postmenopause in rural and urban women from three States of Mexico. *Maturitas*. 2002;43(1):11-19. doi:10.1016/s0378-5122(02)00077-4
42. da Silva AR, d'Andretta Tanaka AC. Factors associated with menopausal symptom severity in middle-aged Brazilian women from the Brazilian Western Amazon. *Maturitas*. 2013;76(1):64-69. doi:10.1016/j.maturitas.2013.05.015
43. Shringarpure KS, Kharawala A, Panchal PP, Brahme KM, Baxi SR, Baxi RK. Prevalence of menopausal symptoms among women in Vadodara, Central Gujarat: The urban-rural divide. *J Family Med Prim Care*. 2022;11(10):6049-6055. doi:10.4103/jfmprc.jfmprc\_115\_22
44. Martínez JA, Palacios S, Chavida F, Pérez M. Urban-rural differences in Spanish menopausal women. *Rural Remote Health*. 2013;13(2):1865.
45. Andac T, Aslan E. Sexual life of women in the climacterium: A community-based study. *Health Care Women Int*. 2017;38(12):1344-1355. doi:10.1080/07399332.2017.1352588

46. Yang D, Haines CJ, Pan P, et al. Menopausal symptoms in mid-life women in southern China. *Climacteric*. 2008;11(4):329-336. doi:10.1080/13697130802239075
47. Yim G, Ahn Y, Chang Y, et al. Prevalence and severity of menopause symptoms and associated factors across menopause status in Korean women. *Menopause*. 2015;22(10):1108-1116. doi:10.1097/GME.0000000000000438
48. Yokota M, Makita K, Hirasawa A, Iwata T, Aoki D. Symptoms and effects of physical factors in Japanese middle-aged women. *Menopause*. 2016;23(9):974-983. doi:10.1097/GME.0000000000000660
49. Gast GC, Grobbee DE, Pop VJ, et al. Menopausal complaints are associated with cardiovascular risk factors. *Hypertension*. 2008;51(6):1492-1498. doi:10.1161/HYPERTENSIONAHA.107.106526
50. Du L, Xu B, Huang C, Zhu L, He N. Menopausal Symptoms and Perimenopausal Healthcare-Seeking Behavior in Women Aged 40-60 Years: A Community-Based Cross-Sectional Survey in Shanghai, China. *Int J Environ Res Public Health*. 2020;17(8):2640. Published 2020 Apr 12. doi:10.3390/ijerph17082640
51. Buhling KJ, Daniels BV, Studnitz FS, Eulenburg C, Mueck AO. The use of complementary and alternative medicine by women transitioning through menopause in Germany: results of a survey of women aged 45-60 years. *Complement Ther Med*. 2014;22(1):94-98. doi:10.1016/j.ctim.2013.12.004
52. Singh A, Pradhan SK. Menopausal symptoms of postmenopausal women in a rural community of Delhi, India: A cross-sectional study. *J Midlife Health*. 2014;5(2):62-67. doi:10.4103/0976-7800.133989
53. Kulkarni P, Savitha Rani BB, Kumar DS, Manjunath R. Burgeoning menopausal symptoms: An urgent public health concern. *J Midlife Health*. 2016;7(2):83-87. doi:10.4103/0976-7800.185329
54. Borker SA, Venugopalan PP, Bhat SN. Study of menopausal symptoms, and perceptions about menopause among women at a rural community in Kerala. *J Midlife Health*. 2013;4(3):182-187. doi:10.4103/0976-7800.118997
55. Rathnayake N, Lenora J, Alwis G, Lekamwasam S. Prevalence and Severity of Menopausal Symptoms and the Quality of Life in Middle-aged Women: A Study from Sri Lanka. *Nurs Res Pract*. 2019;2019:2081507. Published 2019 Jul 1. doi:10.1155/2019/2081507
56. Kwon DH, Lee JH, Ryu KJ, Park HT, Kim T. Vasomotor symptoms and the homeostatic model assessment of insulin-resistance in Korean postmenopausal women. *Obstet Gynecol Sci*. 2016;59(1):45-49. doi:10.5468/ogs.2016.59.1.45
57. Baquedano L, Coronado P, De la Viuda E, et al. Population-based survey on menopausal symptoms and treatment use. *Climacteric*. 2023;26(1):47-54. doi:10.1080/13697137.2022.2139598
58. Brzyski RG, Medrano MA, Hyatt-Santos JM, Ross JS. Quality of life in low-income menopausal women attending primary care clinics. *Fertil Steril*. 2001;76(1):44-50. doi:10.1016/s0015-0282(01)01852-0
59. Hwang JH, Lee K, Choi E, et al. Sleep Quality and Associated Factors in Premenopausal, Perimenopausal, and Postmenopausal Women in Korea: Findings from the K-Stori 2016. *Nat Sci Sleep*. 2021;13:1137-1145. Published 2021 Jul 14. doi:10.2147/NSS.S298397
60. Ahmadieh H, Jradi N. Prevalence of menopausal hot flashes in Lebanon: A cross-sectional study.

Int J Reprod Biomed. 2021;19(9):789-800. Published 2021 Oct 10. doi:10.18502/ijrm.v19i9.9711

61. Namgoung S, Chang Y, Woo CY, et al. Metabolically healthy and unhealthy obesity and risk of vasomotor symptoms in premenopausal women: cross-sectional and cohort studies. *BJOG*. 2022;129(11):1926-1934. doi:10.1111/1471-0528.17224
62. Pateliya K, Patel J, Parmar P, et al. A Cross Sectional Study To Assess Menopausal Symptoms Among Post-Menopausal Women At Kheda District. *Journal of Pharmaceutical Negative Results*. 2022;13:5173-5183. doi: 10.47750/pnr.2022.13.S09.638
63. Aariya S, Archana K, et al. Assessment of prevalence of vasomotor menopausal symptoms using a modified menopause rating scale(MRS) in Peri and postmenopausal women. *International Journal of Research in Pharmaceutical Sciences*. 2021; 12(1):136-140. doi: 10.26452/ijrps.v12i1.3968
64. Chim H, Tan BH, Ang CC, Chew EM, Chong YS, Saw SM. The prevalence of menopausal symptoms in a community in Singapore. *Maturitas*. 2002;41(4):275-282. doi:10.1016/s0378-5122(01)00299-7
65. Dhillon HK, Singh HJ, Shuib R, Hamid AM, Mohd Zaki Nik Mahmood N. Prevalence of menopausal symptoms in women in Kelantan, Malaysia. *Maturitas*. 2006;54(3):213-221. doi:10.1016/j.maturitas.2005.11.001
66. Li Y, Yu Q, Ma L, Sun Z, Yang X. Prevalence of depression and anxiety symptoms and their influence factors during menopausal transition and postmenopause in Beijing city. *Maturitas*. 2008;61(3):238-242. doi:10.1016/j.maturitas.2008.09.002
67. Santoro N, Komi J. Prevalence and impact of vaginal symptoms among postmenopausal women. *J Sex Med*. 2009;6(8):2133-2142. doi:10.1111/j.1743-6109.2009.01335.x
68. Chuni N, Sreeramareddy CT. Frequency of symptoms, determinants of severe symptoms, validity of and cut-off score for Menopause Rating Scale (MRS) as a screening tool: a cross-sectional survey among midlife Nepalese women. *BMC Womens Health*. 2011;11:30. Published 2011 Jun 14. doi:10.1186/1472-6874-11-30
69. Valadares AL, Pinto-Neto AM, de Souza MH, Osis MJ, da Costa Paiva LH. The prevalence of the components of low sexual function and associated factors in middle-aged women. *J Sex Med*. 2011;8(10):2851-2858. doi:10.1111/j.1743-6109.2011.02405.x
70. Nisar N, Sikandar R, Sohoo NA. Menopausal symptoms: prevalence, severity and correlation with sociodemographic and reproductive characteristics. A cross sectional community based survey from rural Sindh Pakistan. *J Pak Med Assoc*. 2015;65(4):409-413.
71. Zhang Y, Zhao X, Leonhart R, et al. A cross-cultural comparison of climacteric symptoms, self-esteem, and perceived social support between Mosuo women and Han Chinese women. *Menopause*. 2016;23(7):784-791. doi:10.1097/GME.0000000000000621
72. Agaba PA, Meloni ST, Sule HM, et al. Prevalence and predictors of severe menopause symptoms among HIV-positive and -negative Nigerian women. *Int J STD AIDS*. 2017;28(13):1325-1334. doi:10.1177/0956462417704778
73. AlQuaiz AM, Kazi A, Habib F, AlBugami M, AlDughaiter A. Factors associated with different symptom domains among postmenopausal Saudi women in Riyadh, Saudi Arabia. *Menopause*. 2017;24(12):1392-1401. doi:10.1097/GME.0000000000000931
74. Grigoriou V, Augoulea A, Armeni E, et al. Prevalence of vasomotor, psychological, psychosomatic and sexual symptoms in perimenopausal and recently postmenopausal Greek

- women: association with demographic, life-style and hormonal factors. *Gynecol Endocrinol.* 2013;29(2):125-128. doi:10.3109/09513590.2012.708801
75. Hunter MS, Gentry-Maharaj A, Ryan A, et al. Prevalence, frequency and problem rating of hot flushes persist in older postmenopausal women: impact of age, body mass index, hysterectomy, hormone therapy use, lifestyle and mood in a cross-sectional cohort study of 10,418 British women aged 54-65. *BJOG.* 2012;119(1):40-50. doi:10.1111/j.1471-0528.2011.03166.x
  76. Haines CJ, Xing SM, Park KH, Holinka CF, Ausmanas MK. Prevalence of menopausal symptoms in different ethnic groups of Asian women and responsiveness to therapy with three doses of conjugated estrogens/medroxyprogesterone acetate: the Pan-Asia Menopause (PAM) study. *Maturitas.* 2005;52(3-4):264-276. doi:10.1016/j.maturitas.2005.03.012
  77. Melby MK. Vasomotor symptom prevalence and language of menopause in Japan. *Menopause.* 2005;12(3):250-257. doi:10.1097/01.gme.0000146108.27840.d9?
  78. Dennerstein L, Dudley EC, Hopper JL, Guthrie JR, Burger HG. A prospective population-based study of menopausal symptoms. *Obstet Gynecol.* 2000;96(3):351-358. doi:10.1016/s0029-7844(00)00930-3
  79. Nappi RE, Nijland EA. Women's perception of sexuality around the menopause: outcomes of a European telephone survey. *Eur J Obstet Gynecol Reprod Biol.* 2008;137(1):10-16. doi:10.1016/j.ejogrb.2006.10.036
  80. Gotmar A, Hammar M, Fredrikson M, et al. Symptoms in peri- and postmenopausal women in relation to testosterone concentrations: data from The Women's Health in the Lund Area (WHILA) study. *Climacteric.* 2008;11(4):304-314. doi:10.1080/13697130802249769
  81. Górecka K, Krzyżanowska M. Prevalence of menopausal hormone therapy and alternative methods, health benefits experienced by peri- and postmenopausal Polish women. *Prz Menopauzalny.* 2022;21(1):27-36. doi:10.5114/pm.2022.113731
  82. Nadia HS, Muna MA, Nahla KA, et al. Prevalence of menopausal symptoms and its relationship with socio-demographic factors among women above 45 years in Mosul, Iraq. *Sociedad Latinoamericana de Hipertensión.* 2021;16:1-7. doi: 10.5281/zenodo.5095349
  83. Sheereen F, Kadarkar KS. Community-based appraisal of menopause-specific health problems and quality of life among women of rural Western Maharashtra. *J Family Med Prim Care.* 2022;11(11):7328-7334. doi:10.4103/jfmpc.jfmpc\_1377\_22
  84. Kang HK, Kaur A, Dhiman A. Menopause-Specific Quality of Life of Rural Women. *Indian J Community Med.* 2021;46(2):273-276. doi:10.4103/ijcm.IJCM\_665\_20
  85. Senthilvel S, Vasudevan S, Anju PS, Sukumaran A, Sureshbabu J. Assessment of Symptoms and Quality of Life among Postmenopausal Women in a Tertiary Care Hospital in Kochi, South India: A Hospital-based Descriptive Study. *J Midlife Health.* 2018;9(4):185-190. doi:10.4103/jmh.JMH\_98\_18
  86. Karmakar N, Majumdar S, Dasgupta A, Das S. Quality of life among menopausal women: A community-based study in a rural area of West Bengal. *J Midlife Health.* 2017;8(1):21-27. doi:10.4103/jmh.JMH\_78\_16
  87. Ganapathy T, SamiaSaud AF. Health-related quality of life among menopausal women. *Archives of Medicine and Health Sciences.* 2018; 6(1):16. doi: 10.4103/amhs.amhs\_122\_17
  88. Sriprasert I, Pantasri T, Piyamongkol W, et al. An International Menopause Society study of vasomotor symptoms in Bangkok and Chiang Mai, Thailand. *Climacteric.* 2017;20(2):171-177.

doi:10.1080/13697137.2017.1284782

89. Tan MN, Kartal M, Guldal D. The effect of physical activity and body mass index on menopausal symptoms in Turkish women: a cross-sectional study in primary care. *BMC Womens Health*. 2014;14(1):38. Published 2014 Mar 6. doi:10.1186/1472-6874-14-38
90. Chopra S, Ranjan P, Verma A, et al. A cross sectional survey of 504 women regarding perceived risk factors and barriers to follow healthy lifestyle and association with sociodemographic factors and menopausal symptoms. *Diabetes Metab Syndr*. 2022;16(6):102529. doi:10.1016/j.dsx.2022.102529
91. Vaccaro CM, Capozzi A, Ettore G, et al. What women think about menopause: An Italian survey. *Maturitas*. 2021;147:47-52. doi:10.1016/j.maturitas.2021.03.007
92. Hachul H, Castro LS, Bezerra AG, et al. Hot flashes, insomnia, and the reproductive stages: a cross-sectional observation of women from the EPISONO study. *J Clin Sleep Med*. 2021;17(11):2257-2267. doi:10.5664/jcsm.9432
93. Saú HPF, Schmitt ACB, Cardoso MRA, Aldrighi JM. Prevalence of hot flashes in women of 40 to 65 years of age with metabolic syndrome. *Rev Assoc Med Bras (1992)*. 2020;66(12):1628-1632. doi:10.1590/1806-9282.66.12.1628
94. Smith RL, Flaws JA, Gallicchio L. Does quitting smoking decrease the risk of midlife hot flashes? A longitudinal analysis. *Maturitas*. 2015;82(1):123-127. doi:10.1016/j.maturitas.2015.06.029
95. Zhao D, Lv G, Qi M, et al. The structure of menopausal syndrome: Using network analysis to understand unique symptomatic relationships. *Int J Gynaecol Obstet*. 2023;160(1):289-296. doi:10.1002/ijgo.14353
96. Han H, Xia X, Zheng H, et al. Factors associated with the high susceptibility to depression of women during the perimenopause. *Brain Behav*. 2023;13(1):e2826. doi:10.1002/brb3.2826
97. Ryu KJ, Park H, Park JS, et al. Vasomotor symptoms and carotid artery intima-media thickness among Korean midlife women. *Maturitas*. 2022;159:1-6. doi:10.1016/j.maturitas.2021.12.005
98. Salin S, Savukoski S, Tulppo M, et al. Does climacteric status impact regulation of the autonomic nervous system at the age of 46 years?. *Climacteric*. 2022;25(6):586-594. doi:10.1080/13697137.2022.2052842
99. Thakur J, Goswami M, Roy S. Do vasomotor and genitourinary symptoms of menopause vary between sedente and migrant groups? A study on the Oraon tribal populations of Eastern India. *Am J Hum Biol*. 2022;34(5):e23710. doi:10.1002/ajhb.23710
100. Tijerina A, Barrera Y, Solis-Pérez E, et al. Nutritional Risk Factors Associated with Vasomotor Symptoms in Women Aged 40-65 Years. *Nutrients*. 2022;14(13):2587. Published 2022 Jun 22. doi:10.3390/nu14132587
101. Koçoğlu F, Kocaöz S, Kara P, Aşçı Ö. Relationship between menopausal symptoms and sleep quality in women during the climacteric period: a cross-sectional study. *J Obstet Gynaecol*. 2022;42(6):2393-2398. doi:10.1080/01443615.2022.2062224
102. Arakane M, Castillo C, Rosero MF, Peñafiel R, Pérez-López FR, Chedraui P. Factors relating to insomnia during the menopausal transition as evaluated by the Insomnia Severity Index. *Maturitas*. 2011;69(2):157-161. doi:10.1016/j.maturitas.2011.02.015
103. AlDughaiter A, AlMutairy H, AlAteeq M. Menopausal symptoms and quality of life among Saudi women visiting primary care clinics in Riyadh, Saudi Arabia. *Int J Womens Health*. 2015;7:645-653. Published 2015 Jun 29. doi:10.2147/IJWH.S84709
104. Ceylan B, Özerdoğan N. Menopausal symptoms and quality of life in Turkish women in the

- climacteric period. *Climacteric*. 2014;17(6):705-712. doi:10.3109/13697137.2014.929108
105. Thakur M, Kaur M, Sinha AK. Assessment of menopausal symptoms in different transition phases using the Greene Climacteric Scale among rural women of North India. *Ann Hum Biol*. 2019;46(1):46-55. doi:10.1080/03014460.2019.1587508
106. Visvanathan K, Gallicchio L, Schilling C, et al. Cytochrome gene polymorphisms, serum estrogens, and hot flushes in midlife women. *Obstet Gynecol*. 2005;106(6):1372-1381. doi:10.1097/01.AOG.0000187308.67021.98
107. Kim MK, Seo SK, Chae HD, et al. Perceptions of Postmenopausal Symptoms and Treatment Options among Middle-Aged Korean Women. *Yonsei Med J*. 2017;58(3):533-539. doi:10.3349/ymj.2017.58.3.533
108. Sievert LL, Shreyer S, Boudreau A, Witkowski S, Brown DE. A comparison of stress, symptoms, physical activity, and adiposity among women at midlife before and during the pandemic. *Womens Midlife Health*. 2022;8(1):5. Published 2022 Apr 5. doi:10.1186/s40695-022-00075-w
109. Gerber LM, Sievert LL. Neighborhood disorder, exposure to violence, and perceived discrimination in relation to symptoms in midlife women. *Womens Midlife Health*. 2018;4:14. Published 2018 Oct 19. doi:10.1186/s40695-018-0043-0
110. Silvestrin T, Steenrod A, Coyne K, et al. Outcomes of implementing the women's health assessment tool and clinical decision support toolkit. *Womens Health (Lond)*. 2016;12(3):313-323. doi:10.2217/whe.16.3
111. Ghazanfarpour M, Khadivzadeh T, Babakhanian M. Investigating the Relationship Between Sexual Function and Quality of Life in Menopausal Women. *J Family Reprod Health*. 2016;10(4):191-197.
112. Duffy OK, Iversen L, Hannaford PC. The impact and management of symptoms experienced at midlife: a community-based study of women in northeast Scotland. *BJOG*. 2012;119(5):554-564. doi:10.1111/j.1471-0528.2012.03276.x
113. Loutfy I, Abdel Aziz F, Dabbous NI, Hassan MH. Women's perception and experience of menopause: a community-based study in Alexandria, Egypt. *East Mediterr Health J*. 2006;12 Suppl 2:S93-S106.
114. Delavar MA, Hajiahmadi M. Age at menopause and measuring symptoms at midlife in a community in Babol, Iran. *Menopause*. 2011;18(11):1213-1218. doi:10.1097/gme.0b013e31821a7a3a
115. Chedraui P, Hidalgo L, Chavez D, Morocho N, Alvarado M, Huc A. Menopausal symptoms and associated risk factors among postmenopausal women screened for the metabolic syndrome. *Arch Gynecol Obstet*. 2007;275(3):161-168. doi:10.1007/s00404-006-0239-7
116. Chedraui P, Pérez-López FR, Schwager G, et al. Resilience and related factors during female Ecuadorian mid-life. *Maturitas*. 2012;72(2):152-156. doi:10.1016/j.maturitas.2012.03.004
117. Chedraui P, Pérez-López FR, Sánchez H, et al. Application of the 10-item Cervantes Scale among mid-aged Ecuadorian women for the assessment of menopausal symptoms. *Maturitas*. 2014;79(1):100-105. doi:10.1016/j.maturitas.2014.06.019
118. Suka M, Taniuchi A, Kudo Y, Sato S, Yoshida K, Ishizuka B. Self-assessed health and menopausal symptoms among 50-year-old Japanese women: cross-sectional surveys in Northern Kawasaki in 1998 and 2008. *Menopause*. 2010;17(1):166-173. doi:10.1097/gme.0b013e3181b6683f
119. Rahman S, Salehin F, Iqbal A. Menopausal symptoms assessment among middle age women

- in Kushtia, Bangladesh. *BMC Res Notes*. 2011;4:188. Published 2011 Jun 15. doi:10.1186/1756-0500-4-188
120. Singh M. Early age of natural menopause in India, a biological marker for early preventive health programs. *Climacteric*. 2012;15(6):581-586. doi:10.3109/13697137.2011.643514
121. Aguilar-Zavala H, Pérez-Luque EL, Luna-Martínez F, et al. Symptoms at postmenopause: genetic and psychosocial factors. *Menopause*. 2012;19(10):1140-1145. doi:10.1097/gme.0b013e3182503bde
122. Agwu UM, Umeora OU, Ejikeme BN. Patterns of menopausal symptoms and adaptive ability in a rural population in South-east Nigeria. *J Obstet Gynaecol*. 2008;28(2):217-221. doi:10.1080/01443610801915637
123. Ahmed K, Jahan P, Nadia I, Ahmed F, Abdullah-Al-Emran. Assessment of Menopausal Symptoms among Early and Late Menopausal Midlife Bangladeshi Women and Their Impact on the Quality of Life. *J Menopausal Med*. 2016;22(1):39-46. doi:10.6118/jmm.2016.22.1.39
124. Gartoulla P, Bell RJ, Worsley R, Davis SR. Menopausal vasomotor symptoms are associated with poor self-assessed work ability. *Maturitas*. 2016;87:33-39. doi:10.1016/j.maturitas.2016.02.003
125. Berecki-Gisolf J, Begum N, Dobson AJ. Symptoms reported by women in midlife: menopausal transition or aging?. *Menopause*. 2009;16(5):1021-1029. doi:10.1097/gme.0b013e3181a8c49f
126. Bener A, Falah A. A measurement-specific quality-of-life satisfaction during premenopause, perimenopause and postmenopause in Arabian Qatari women. *J Midlife Health*. 2014;5(3):126-134. doi:10.4103/0976-7800.141190
127. Bener A, Rizk DE, Shaheen H, Micallef R, Osman N, Dunn EV. Measurement-specific quality-of-life satisfaction during the menopause in an Arabian Gulf country. *Climacteric*. 2000;3(1):43-49. doi:10.3109/13697130009167598
128. Im EO, Lee B, Chee W, Brown A, Dormire S. Menopausal symptoms among four major ethnic groups in the United States. *West J Nurs Res*. 2010;32(4):540-565. doi:10.1177/0193945909354343
129. Williams RE, Kalilani L, DiBenedetti DB, et al. Frequency and severity of vasomotor symptoms among peri- and postmenopausal women in the United States. *Climacteric*. 2008;11(1):32-43. doi:10.1080/13697130701744696
130. Ande AB, Omu OP, Ande OO, Olagbuji NB. Features and perceptions of menopausal women in Benin City, Nigeria. *Ann Afr Med*. 2011;10(4):300-304. doi:10.4103/1596-3519.87048
131. Andenæs R, Småstuen MC, Misvær N, Ribu L, Vistad I, Helseth S. Associations between menopausal hormone therapy and sleep disturbance in women during the menopausal transition and post-menopause: data from the Norwegian prescription database and the HUNT study. *BMC Womens Health*. 2020;20(1):64. Published 2020 Mar 30. doi:10.1186/s12905-020-00916-8
132. Khatoon A, Husain S, Husain S, Hussain S. An Overview of Menopausal Symptoms Using the Menopause Rating Scale in a Tertiary Care Center. *J Midlife Health*. 2018;9(3):150-154. doi:10.4103/jmh.JMH\_31\_18
133. Budakoğlu II, Özcan C, Eroğlu D, Yanik F. Quality of life and postmenopausal symptoms among women in a rural district of the capital city of Turkey. *Gynecol Endocrinol*. 2007;23(7):404-409. doi:10.1080/09513590701444748

134. Sharanya Shre ES, Trout K, Singh SP, Singh AK, Mohan SK, Joshi A. Severity and clustering of menopausal symptoms among obese and nonobese postmenopausal women in India. *J Pharm Bioallied Sci.* 2016;8(2):106-111. doi:10.4103/0975-7406.171728
135. Damodaran P, Subramaniam R, Omar SZ, Nadkarni P, Paramsothy M. Profile of a menopause clinic in an urban population in Malaysia. *Singapore Med J.* 2000;41(9):431-435.
136. Zeleke BM, Bell RJ, Billah B, Davis SR. Vasomotor and sexual symptoms in older Australian women: a cross-sectional study. *Fertil Steril.* 2016;105(1):149-55.e1. doi:10.1016/j.fertnstert.2015.09.017
137. Masoudi M, Ahmadian H, Akbari M, et al. Correlation of the Severity of Physical and Psychological Symptoms and Severity of Insomnia in Postmenopausal Women. *Journal of Kermanshah University of Medical Sciences.* 2021;25(1). doi:25. 10.5812/jkums.110550.
138. S. Beura, L. Patnaik, M. Sahu, et al. Self-reported menopausal symptoms among postmenopausal women- A cross-sectional study in an urban slum of Odisha, India. *European Journal of Molecular and Clinical Medicine.* 2020;7(6) 849-859.
139. Thapa R, Yang Y. Menopausal symptoms and related factors among Cambodian women. *Women Health.* 2020;60(4):396-411. doi:10.1080/03630242.2019.1643815
140. Ibrahim ZM, Sayed Ahmed WA, El-Hamid SA. Prevalence of menopausal related symptoms and their impact on quality of life among Egyptian women. *Clin Exp Obstet Gynecol.* 2015;42(2):161-167.
141. Nusrat N, Nishat Z, Gulfareen H, Aftab M, Asia N. Knowledge, attitude and experience of menopause. *J Ayub Med Coll Abbottabad.* 2008;20(1):56-59.
142. K. Santhoshi Bhavani, S. Yamjala, P. Sadanandam, et al. Epidemiological Profile of Postmenopausal Women: A Cross Sectional Study. *European Journal of Molecular and Clinical Medicine.* 2022;9(1) 1294-1305.
143. Liu J, Eden J. Experience and attitudes toward menopause in Chinese women living in Sydney- a cross sectional survey. *Maturitas.* 2007;58(4):359-365. doi:10.1016/j.maturitas.2007.09.007
144. Fooladi E, Bell RJ, Masoumi M, Azizi M, Atarod Z, Davis SR. Botherome menopausal symptoms amongst postmenopausal Iranian women. *Climacteric.* 2018;21(6):586-593. doi:10.1080/13697137.2018.1493452
145. Lee PS, Lee CL. Prevalence of symptoms and associated factors across menopause status in Taiwanese women. *Menopause.* 2020;28(2):182-188. Published 2020 Oct 12. doi:10.1097/GME.0000000000001662
146. M. Modoodi, F. Jalilvand, S. Zare, M, et al. Investigating the prevalence of menopausal complications and its related factors in women referred to Shahroud Health Centers in 2014. *Revista Latinoamericana de Hipertension.* 2020; 15(2):144-149
147. Kalhan M, Singhania K, Choudhary P, Verma S, Kaushal P, Singh T. Prevalence of Menopausal Symptoms and its Effect on Quality of Life among Rural Middle Aged Women (40-60 Years) of Haryana, India. *Int J Appl Basic Med Res.* 2020;10(3):183-188. doi:10.4103/ijabmr.IJABMR\_428\_19
148. Rindner L, Strömme G, Nordeman L, et al. Prevalence of somatic and urogenital symptoms as well as psychological health in women aged 45 to 55 attending primary health care: a cross-sectional study. *BMC Womens Health.* 2017;17(1):128. Published 2017 Dec 8. doi:10.1186/s12905-017-0480-1
149. H. M. Al-Musa, R. A. Ahmed, A. S. Alsamghan, et al. The prevalence of symptoms experienced



- during menopause, influence of socio-demographic variables on symptoms and quality of life among women at Abha, Saudi Arabia. *Biomedical Research (India)*. 2017;28(6):2587-2595
150. Moilanen J, Aalto AM, Hemminki E, Aro AR, Raitanen J, Luoto R. Prevalence of menopause symptoms and their association with lifestyle among Finnish middle-aged women. *Maturitas*. 2010;67(4):368-374. doi:10.1016/j.maturitas.2010.08.007
151. Bairy L, Adiga S, Bhat P, Bhat R. Prevalence of menopausal symptoms and quality of life after menopause in women from South India. *Aust N Z J Obstet Gynaecol*. 2009;49(1):106-109. doi:10.1111/j.1479-828X.2009.00955.x
152. Heinemann K, Rübige A, Strothmann A, Nahum GG, Heinemann LA. Prevalence and opinions of hormone therapy prior to the Women's Health Initiative: a multinational survey on four continents. *J Womens Health (Larchmt)*. 2008;17(7):1151-1166. doi:10.1089/jwh.2007.0584
153. Uncu Y, Alper Z, Ozdemir H, Bilgel N, Uncu G. The perception of menopause and hormone therapy among women in Turkey. *Climacteric*. 2007;10(1):63-71. doi:10.1080/13697130601037324
154. Lawton BA, Rose SB, Cormack DM, Stanley J, Dowell AC. The menopause symptom profile of Maori and non-Maori women in New Zealand. *Climacteric*. 2008;11(6):467-474. doi:10.1080/13697130802351094
155. Liu J, Eden JA. The menopausal experience of Greek women living in Sydney. *Menopause*. 2008;15(3):476-481. doi:10.1097/gme.0b013e318154bda0
156. Lu J, Liu J, Eden J. The experience of menopausal symptoms by Arabic women in Sydney. *Climacteric*. 2007;10(1):72-79. doi:10.1080/13697130601159649
157. Saccomani S, Lui-Filho JF, Juliato CR, Gabiatti JR, Pedro AO, Costa-Paiva L. Does obesity increase the risk of hot flashes among midlife women?: a population-based study. *Menopause*. 2017;24(9):1065-1070. doi:10.1097/GME.0000000000000884
158. Im EO. Ethnic differences in symptoms experienced during the menopausal transition. *Health Care Women Int*. 2009;30(4):339-355. doi:10.1080/07399330802695002
159. Resmi S, Anil Bindu S, Benny P. V. Climacteric symptoms among women residing in a rural area of Kerala state-A cross-sectional study. *Clinical Epidemiology and Global Health*. 2020;8(4):1341-1344. doi: 10.1016/j.cegh.2020.05.008.
160. M. Ashrafi, S. K. Ashtiani, F. Malekzadeh, et al. Symptoms of natural menopause among Iranian women living in Tehran, Iran. *Iranian Journal of Reproductive Medicine*. 2010; 8(1):29-32
161. Ayranci U, Orsal O, Orsal O, Arslan G, Emeksiz DF. Menopause status and attitudes in a Turkish midlife female population: an epidemiological study. *BMC Womens Health*. 2010;10:1. Published 2010 Jan 11. doi:10.1186/1472-6874-10-1
162. Deveci SE, Açık Y, Dag DG, Tokdemir M, Gündoğdu C. The frequency of depression and menopause-related symptoms in postmenopausal women living in a province in Eastern Turkey, and the factors that affect depressive status. *Med Sci Monit*. 2010;16(4):PH40-PH47.
163. M. M. Sagdeo, D. Arora. Menopausal symptoms: A comparative study in rural and Urban Women. *JK Science*. 2011; 13(1):23-26
164. Oğurlu N, Küçük M, Aksu H. Influence of employment status on menopausal symptoms. *Int J Gynaecol Obstet*. 2011;112(3):204-207. doi:10.1016/j.ijgo.2010.10.010
165. Wang X, Zhao G, Di J, Wang L, Zhang X. Prevalence and risk factors for depressive and anxiety symptoms in middle-aged Chinese women: a community-based cross-sectional study. *BMC*

- Womens Health. 2022;22(1):319. Published 2022 Jul 29. doi:10.1186/s12905-022-01908-6
166. Anolue FC, Dike E, Adogu P, Ebirim C. Women's experience of menopause in rural communities in Orlu, Eastern Nigeria. *Int J Gynaecol Obstet.* 2012;118(1):31-33. doi:10.1016/j.ijgo.2012.02.014
  167. Mahajan N, Aggarwal M, Bagga A. Health issues of menopausal women in North India. *J Midlife Health.* 2012;3(2):84-87. doi:10.4103/0976-7800.104467
  168. Mustafa GN, Sabir JM. Perception and experience regarding menopause among menopausal women attending teaching hospitals in Erbil City. *Glob J Health Sci.* 2012;4(3):170-178. Published 2012 Apr 28. doi:10.5539/gjhs.v4n3p170
  169. Nappi RE, Kokot-Kierepa M. Vaginal Health: Insights, Views & Attitudes (VIVA) - results from an international survey. *Climacteric.* 2012;15(1):36-44. doi:10.3109/13697137.2011.647840
  170. Sassoon SA, de Zambotti M, Colrain IM, Baker FC. Association between personality traits and DSM-IV diagnosis of insomnia in peri- and postmenopausal women. *Menopause.* 2014;21(6):602-611. doi:10.1097/GME.0000000000000192
  171. Liu M, Wang Y, Li X, et al. A health survey of Beijing middle-aged registered nurses during menopause. *Maturitas.* 2013;74(1):84-88. doi:10.1016/j.maturitas.2012.10.006
  172. Mohamed H, Lamadah Sahar, Al Z, et al. Quality of life among menopausal women. *International Journal of Reproduction, Contraception, Obstetrics and Gynecology.* 2014;3(1).doi:10.5455/2320-1770.ijrcog20140906.
  173. Hashemzadeh M, Keramat A, Mollaahmadi L, Ghiasi A, Haseli A. The Role of Lifestyle in Developing and Maintaining Vasomotor Symptoms: A Cross-Sectional Study among Iranian Postmenopausal Women. *J Midlife Health.* 2019;10(4):184-191. doi:10.4103/jmh.JMH\_64\_19
  174. Hestiantoro, A., Jasirwan, S.O., Wiwie, M., Shadrina, A., Ibrahim, N. and Astuti, B.P.K. Low estradiol levels escalate menopausal symptoms leading to mild cognitive impairment in postmenopausal women. *Medical Journal of Indonesia.* 2019;28(1):40-6. doi:https://doi.org/10.13181/mji.v28i1.2447.
  175. Kong F, Wang J, Zhang C, Feng X, Zhang L, Zang H. Assessment of sexual activity and menopausal symptoms in middle-aged Chinese women using the Menopause Rating Scale. *Climacteric.* 2019;22(4):370-376. doi:10.1080/13697137.2018.1547702
  176. Sharifi N, Najar S, Rezaii N, et al. The Association Between Menopausal Symptoms and General Health Among Iranian Women With Menopause: A Cross-Sectional Study. *International Journal of Women's Health and Reproduction Sciences.* 2019;7(2):196-203. doi:10.15296/ijwhr.2019.33
  177. Taavoni S, Ekbatani NN, Haghani H. Postmenopausal Women's Quality of Sleep and its Related Factors. *J Midlife Health.* 2015;6(1):21-25. doi:10.4103/0976-7800.153611
  178. Li S, Holm K, Gulanick M, Lanuza D. Perimenopause and the quality of life. *Clin Nurs Res.* 2000;9(1):6-26. doi:10.1177/10547738000900102
  179. Pan HA, Wu MH, Hsu CC, Yao BL, Huang KE. The perception of menopause among women in Taiwan. *Maturitas.* 2002;41(4):269-274. doi:10.1016/s0378-5122(01)00279-1
  180. Kasuga M, Makita K, Ishitani K, et al. Relation between climacteric symptoms and ovarian hypofunction in middle-aged and older Japanese women. *Menopause.* 2004;11(6 Pt 1):631-638. doi:10.1097/01.gme.0000119984.87302.30
  181. Kaur S, Walia I, Singh A. How menopause affects the lives of women in suburban Chandigarh, India. *Climacteric.* 2004;7(2):175-180. doi:10.1080/13697130410001713779

182. Yahya S, Rehan N. Age, pattern and symptoms of menopause among rural women of Lahore. *J Ayub Med Coll Abbottabad*. 2002;14(3):9-12.
183. Gupta P, Sturdee DW, Hunter MS. Mid-age health in women from the Indian subcontinent (MAHWIS): general health and the experience of menopause in women. *Climacteric*. 2006;9(1):13-22. doi:10.1080/13697130500515776
184. Inayat K, Danish N, Hassan L. Symptoms Of Menopause In Peri And Postmenopausal Women And Their Attitude Towards Them. *J Ayub Med Coll Abbottabad*. 2017;29(3):477-480.
185. Mathialagan S, Ramasamy S, Nagandla K, Siew WF, Sreeramareddy CT. Menopause Rating Scale (MRS) in the Malay language-translation and validation in a multiethnic population of Selangor, Malaysia. *BMC Womens Health*. 2022;22(1):347. Published 2022 Aug 17. doi:10.1186/s12905-022-01922-8
186. Canário AC, Cabral PU, Spyrides MH, Giraldo PC, Eleutério J Jr, Gonçalves AK. The impact of physical activity on menopausal symptoms in middle-aged women. *Int J Gynaecol Obstet*. 2012;118(1):34-36. doi:10.1016/j.ijgo.2012.02.016
187. Rahman, M. M., M. A. Rahman, K. Alo, and F. Mehrin. Impact of Body Mass Index (BMI) and Physical Activities Among Menopausal Women: BMI and Physical Activities Among Menopausal Women. *Bangladesh Medical Research Council Bulletin*. 2020;46(2):109-14, doi:10.3329/bmrcb.v46i2.49020.
188. Abedzadeh-kalahroud M, Taebi M, Sadat Z. Prevalence and Severity of Menopause Symptoms and Related Factors among Women 40-60 Years in Kashan Iran. *Nursing and Midwifery Studies*, 2012;1:88-93. doi:10.5812/nms.8358
189. Diyu IANP, Satriani NLA. Menopausal symptoms in women aged 40-65 years in Indonesia. *Ijhms*.2022;5(2):169-76. doi:https://sloap.org/journal/index.php/ijhms/article/view/1896
190. Zhang JP, Wang YQ, Yan MQ, Li ZA, Du XP, Wu XQ. Menopausal Symptoms and Sleep Quality During Menopausal Transition and Postmenopause. *Chin Med J (Engl)*. 2016;129(7):771-777. doi:10.4103/0366-6999.178961
191. Ryu KJ, Park H, Kim YJ, et al. Comparison of various menopausal symptoms and risk factor analysis in Korean women according to stage of menopause. *Maturitas*. 2020;140:41-48. doi:10.1016/j.maturitas.2020.05.023
192. Ma, Mingze et al. "A health survey of perimenopausal syndrome and mood disorders in perimenopause : a cross-sectional study in Shanghai." (2017).
193. Fu JX, Luo Y, Chen MZ, et al. Associations among menopausal status, menopausal symptoms, and depressive symptoms in midlife women in Hunan Province, China. *Climacteric*. 2020;23(3):259-266. doi:10.1080/13697137.2019.1703936
194. Liu X, Fu X, Du R, Chen Z, Sun J, Ding Y. Epidemiology and Risk Factors of Menopause Syndrome Among Uyghur, Han, and Kazak Women in Xinjiang, China. *Med Sci Monit*. 2018;24:8950-8958. Published 2018 Dec 10. doi:10.12659/MSM.909954
195. Li RX, Ma M, Xiao XR, Xu Y, Chen XY, Li B. Perimenopausal syndrome and mood disorders in perimenopause: prevalence, severity, relationships, and risk factors. *Medicine (Baltimore)*. 2016;95(32):e4466. doi:10.1097/MD.0000000000004466
196. Joshi M, Nair S. Epidemiological Study to Assess the Menopausal Problems during Menopausal Transition in Middle Age Women of Vadodara, Gujarat, India. *Indian Journal of Obstetrics and Gynecology Research*. 2015;2:163. doi:10.5958/2394-2754.2015.00007.7.
197. Ghimire N, Dhakal P, Norrish D, et al. Menopausal Health Status of Women of Kapilvastu

- District of Nepal. *J Nepal Health Res Counc.* 2015;13(31):182-187.
198. Joseph N, Nagaraj K, Saralaya V, Nelliyanil M, Rao PJ. Assessment of menopausal symptoms among women attending various outreach clinics in South Canara District of India. *J Midlife Health.* 2014;5(2):84-90. doi:10.4103/0976-7800.133996
199. Dasgupta D, Ray S. Vasomotor and urogenital problems at midlife: a study on rural and urban women in India. *Ann Hum Biol.* 2015;42(3):268-275. doi:10.3109/03014460.2014.941397
200. Sievert LL, Begum K, Sharmeen T, Chowdhury O, Muttukrishna S, Bentley G. Patterns of occurrence and concordance between subjective and objective hot flashes among Muslim and Hindu women in Sylhet, Bangladesh. *Am J Hum Biol.* 2008;20(5):598-604. doi:10.1002/ajhb.20785
201. Anil, B. S., Anitha, B., Jose, J. Prevalence of menopausal symptoms among women (menopausal for < 5 years) in a rural area in Kottayam, Kerala, India. *Journal of Evolution of Medical and Dental Sciences*, 2014;3(17), 4648-4657. doi: 10.14260/jemds/2014/2490
202. Srivastava M, Srivastava R, Pandit B. Presentation of menopausal symptoms: A village based community study. *Asian Journal of Medical Sciences.* 2014; 6. doi:10.3126/ajms.v6i1.8431.
203. Rokhade, Chandramati J. et al. HEALTH RELATED COMPLICATIONS IN MENOPAUSAL WOMEN OF NORTH KARNATAKA. 2013.
204. Sun D, Shao H, Li C, Tao M. Sleep disturbance and correlates in menopausal women in Shanghai. *J Psychosom Res.* 2014;76(3):237-241. doi:10.1016/j.jpsychores.2013.12.002
205. Wong BWX, Chan YH, Kramer MS, et al. Factors associated with poor sleep quality in midlife Singaporean women: The Integrated Women's Health program (IWHP). *Sleep Med X.* 2022;5:100060. Published 2022 Dec 9. doi:10.1016/j.sleepx.2022.100060
206. Espírito Santo J, Hita-Contreras F, Marques de Loureiro NE, et al. Associations between the impact of menopausal symptoms and fall-related self-efficacy. *Menopause.* 2023;30(4):421-426. doi:10.1097/GME.0000000000002151
207. Xu Q, Zhao Y, Chen H, Jing J. Exploring Sleep Quality and Related Factors in Chinese Midlife Women. *Health Care Women Int.* 2016;37(6):620-635. doi:10.1080/07399332.2015.1037443
208. Lerner-Geva L, Boyko V, Blumstein T, Benyamini Y. The impact of education, cultural background, and lifestyle on symptoms of the menopausal transition: the Women's Health at Midlife Study. *J Womens Health (Larchmt).* 2010;19(5):975-985. doi:10.1089/jwh.2009.1381
209. Sweed HS, Elawam AE, Nabeel AM, Mortagy K. Postmenopausal symptoms among Egyptian geripausal women. *East Mediterr Health J.* 2012;18(3):213-220. doi:10.26719/2012.18.3.213
210. Taher YA, Ben Emhemed HM, Tawati AM. Menopausal age, related factors and climacteric symptoms in Libyan women. *Climacteric.* 2013;16(1):179-184. doi:10.3109/13697137.2012.682107
211. Ryan J, Burger HG, Szoeki C, et al. A prospective study of the association between endogenous hormones and depressive symptoms in postmenopausal women. *Menopause.* 2009;16(3):509-517. doi:10.1097/gme.0b013e31818d635f
212. Beigi M, Fahami F. A Comparative study on sexual dysfunctions before and after menopause. *Iran J Nurs Midwifery Res.* 2012;17(2 Suppl 1):S72-S75.
213. G K P, Arounassalame B. The quality of life during and after menopause among rural women. *J Clin Diagn Res.* 2013;7(1):135-139. doi:10.7860/JCDR/2012/4910.2688
214. Bernis C, Reher DS. Environmental contexts of menopause in Spain: comparative results from recent research. *Menopause.* 2007;14(4):777-787. doi:10.1097/gme.0b013e31803020ff

215. Dibonaventura MD, Chandran A, Hsu MA, Bushmakina A. Burden of vasomotor symptoms in France, Germany, Italy, Spain, and the United Kingdom. *Int J Womens Health*. 2013;5:261-269. Published 2013 May 24. doi:10.2147/IJWH.S39027
216. Freeman EW, Sammel MD, Lin H. Temporal associations of hot flashes and depression in the transition to menopause. *Menopause*. 2009;16(4):728-734. doi:10.1097/gme.0b013e3181967e16
217. Seib C, Anderson D, Lee K. Prevalence and correlates of sleep disturbance in postmenopausal women: the Australian Healthy Aging of Women (HOW) Study. *J Womens Health (Larchmt)*. 2014;23(2):151-158. doi:10.1089/jwh.2013.4472
218. Chedraui P, Aguirre W, Hidalgo L, Fayad L. Assessing menopausal symptoms among healthy middle aged women with the Menopause Rating Scale. *Maturitas*. 2007;57(3):271-278. doi:10.1016/j.maturitas.2007.01.009
219. Ahlawat P, Singh MM, Garg S, Mala YM. Prevalence of Depression and its Association with Sociodemographic Factors in Postmenopausal Women in an Urban Resettlement Colony of Delhi. *J Midlife Health*. 2019;10(1):33-36. doi:10.4103/jmh.JMH\_66\_18
220. Bansal P, Chaudhary A, Soni RK, Sharma S, Gupta VK, Kaushal P. Depression and anxiety among middle-aged women: A community-based study. *J Family Med Prim Care*. 2015;4(4):576-581. doi:10.4103/2249-4863.174297
221. Dutta R, Rajendran P, Ramya S, et al. Prevalence of depression among the Post-Menopausal women in the field practice area of saveetha medical college and hospital, Thirumazhisai, Tamil Nadu. *Indian Journal of Public Health Research and Development*,2018; 9, 175-179.
222. Nayak S, Binil V, Christabel S. Depressive Symptoms and Bio-psychosocial Problems among Postmenopausal Women of Udupi District, Karnataka, India. *J Clin of Diagn Res*. 2019; 13(1):VC01-VC04. doi:10.7860/JCDR/2019/38164/12455
223. Ps A, Das S, Philip S, et al. Prevalence of depression among middle aged women in the rural area of Kerala. *Asian J Psychiatr*. 2017;29:154-159. doi:10.1016/j.ajp.2017.05.016
224. Alam MM, Ahmed S, Dipti RK, Siddiquee RE, Hawlader MDH. The prevalence and associated factors of depression during pre-, peri-, and post-menopausal period among the middle-aged women of Dhaka city. *Asian J Psychiatr*. 2020;54:102312. doi:10.1016/j.ajp.2020.102312
225. Shin C, Lee S, Lee T, et al. Prevalence of insomnia and its relationship to menopausal status in middle-aged Korean women. *Psychiatry Clin Neurosci*. 2005;59(4):395-402. doi:10.1111/j.1440-1819.2005.01391.x
226. Fabbrini M, Aric  I, Tramonti F, et al. Sleep disorders in menopause: results from an Italian Multicentric Study. *Arch Ital Biol*. 2015;153(2-3):204-213. doi:10.12871/0003982920152345
227. Luo M, Li J, Tang R, et al. Insomnia symptoms in relation to menopause among middle-aged Chinese women: Findings from a longitudinal cohort study. *Maturitas*. 2020;141:1-8. doi:10.1016/j.maturitas.2020.06.010
228. Geng L, Zheng Y, Zhou Y, Li C, Tao M. The prevalence and determinants of genitourinary syndrome of menopause in Chinese mid-life women: a single-center study. *Climacteric*. 2018;21(5):478-482. doi:10.1080/13697137.2018.1458832
229. Moral E, Delgado JL, Carmona F, et al. Genitourinary syndrome of menopause. Prevalence and quality of life in Spanish postmenopausal women. The GENISSE study. *Climacteric*. 2018;21(2):167-173. doi:10.1080/13697137.2017.1421921
230. Ahmed HM, Osman VA, Al-Alaf SK, Al-Tawil NG. Prevalence of urinary incontinence and

- probable risk factors in a sample of kurdish women. *Sultan Qaboos Univ Med J*. 2013;13(2):269-274. doi:10.12816/0003233
231. Xu C, Chen M, Fu J, Meng Y, Qin S, Luo Y. Urinary incontinence status and risk factors in women aged 50-70 years: a cross-sectional study in Hunan, China. *Int Urogynecol J*. 2021;32(1):95-102. doi:10.1007/s00192-020-04259-8
232. Islam RM, Bell RJ, Hossain MB, Davis SR. Types of urinary incontinence in Bangladeshi women at midlife: Prevalence and risk factors. *Maturitas*. 2018;116:18-23. doi:10.1016/j.maturitas.2018.07.012
233. Yagmur Y, Gul S. Urinary incontinence in women aged 40 and older: Its prevalence, risk factors, and effect on quality of life. *Niger J Clin Pract*. 2021;24(2):186-192. doi:10.4103/njcp.njcp\_626\_18
234. Chung KF, Tang MK. Subjective sleep disturbance and its correlates in middle-aged Hong Kong Chinese women. *Maturitas*. 2006;53(4):396-404. doi:10.1016/j.maturitas.2005.07.001
235. Hsu HC, Lin MH. Exploring quality of sleep and its related factors among menopausal women. *J Nurs Res*. 2005;13(2):153-164. doi:10.1097/01.jnr.0000387536.60760.4e
236. Ward T, Scheid V, Tuffrey V. Women's mid-life health experiences in urban UK: an international comparison. *Climacteric*. 2010;13(3):278-288. doi:10.3109/13697130903197479
237. Pandey A, Karki C, Shrivastava VR, Shrestha D, Gautam P. Study of Menopausal Symptoms using Menopause Rating Scale at a Tertiary Care Center: A Descriptive Cross-sectional Study. *JNMA J Nepal Med Assoc*. 2020;58(230):725-728. Published 2020 Oct 15. doi:10.31729/jnma.5200
238. Abdelaziz EM, Elsharkawy NB, Mohamed SM. The relationship between sleep quality and menopausal symptoms among postmenopausal women in Saudi Arabia. *Saudi Med J*. 2022;43(4):401-407. doi:10.15537/smj.2022.43.4.20210682
239. Liao K, Gu Y, Liu M, et al. Association of dietary patterns with depressive symptoms in Chinese postmenopausal women. *Br J Nutr*. 2019;122(10):1168-1174. doi:10.1017/S0007114519001867
240. Sievert LL, Morrison L, Brown DE, Reza AM. Vasomotor symptoms among Japanese-American and European-American women living in Hilo, Hawaii. *Menopause*. 2007;14(2):261-269. doi:10.1097/01.gme.0000233496.13088.24
241. Sievert LL, Espinosa-Hernandez G. Attitudes toward menopause in relation to symptom experience in Puebla, Mexico. *Women Health*. 2003;38(2):93-106. doi:10.1300/J013v38n02\_07
242. Obermeyer CM, Reynolds RF, Price K, Abraham A. Therapeutic decisions for menopause: results of the DAMES project in central Massachusetts. *Menopause*. 2004;11(4):456-465. doi:10.1097/01.gme.0000109318.11228.da
243. Keenan NL, Mark S, Fugh-Berman A, Browne D, Kaczmarczyk J, Hunter C. Severity of menopausal symptoms and use of both conventional and complementary/alternative therapies. *Menopause*. 2003;10(6):507-515. doi:10.1097/01.GME.0000064865.58809.3E
244. Jansson C, Johansson S, Lindh-Astrand L, Hoffmann M, Hammar M. The prevalence of symptoms possibly related to the climacteric in pre- and postmenopausal women in Linköping, Sweden. *Maturitas*. 2003;45(2):129-135. doi:10.1016/s0378-5122(03)00127-0
245. Zhao G, Wang L, Yan R, Dennerstein L. Menopausal symptoms: experience of Chinese women. *Climacteric*. 2000;3(2):135-144. doi:10.3109/13697130009167615

246. Lam PM, Leung TN, Haines C, Chung TK. Climacteric symptoms and knowledge about hormone replacement therapy among Hong Kong Chinese women aged 40-60 years. *Maturitas*. 2003;45(2):99-107. doi:10.1016/s0378-5122(03)00090-2
247. Gollschewski S, Anderson D, Skerman H, Lyons-Wall P. The use of complementary and alternative medications by menopausal women in South East Queensland. *Womens Health Issues*. 2004;14(5):165-171. doi:10.1016/j.whi.2004.08.001
248. Biri A, Bakar C, Maral I, Karabacak O, Bumin MA. Women with and without menopause over age of 40 in Turkey: consequences and treatment options. *Maturitas*. 2005;50(3):167-176. doi:10.1016/j.maturitas.2004.05.013
249. Obermeyer CM, Schulein M, Hajji N, Azelmat M. Menopause in Morocco: symptomatology and medical management. *Maturitas*. 2002;41(2):87-95. doi:10.1016/s0378-5122(01)00289-4
250. Lin HL, Hsiao MC, Liu YT, Chang CM. Perimenopause and incidence of depression in midlife women: a population-based study in Taiwan. *Climacteric*. 2013;16(3):381-386. doi:10.3109/13697137.2012.707706
251. Loh FH, Khin LW, Saw SM, Lee JJ, Gu K. The age of menopause and the menopause transition in a multiracial population: a nation-wide Singapore study. *Maturitas*. 2005;52(3-4):169-180. doi:10.1016/j.maturitas.2004.11.004
252. Chaopotong P, Titapant V, Boriboonhirunsarn D. Menopausal symptoms and knowledge towards daily life and hormone replacement therapy among menopausal women in Bangkok. *J Med Assoc Thai*. 2005;88(12):1768-1774.
253. Zhu Y, Wei J, Yang X, Zhu W, Zhang W. Investigation on prevalence and risk factors associated with genitourinary syndrome of menopause in middle-aged and older women in Beijing community: a cross sectional study. *BMC Womens Health*. 2022;22(1):558. Published 2022 Dec 30. doi:10.1186/s12905-022-02099-w
254. Huang KE, Xu L, I NN, Jaisamrarn U. The Asian Menopause Survey: knowledge, perceptions, hormone treatment and sexual function. *Maturitas*. 2010;65(3):276-283. doi:10.1016/j.maturitas.2009.11.015
255. Hunter MS, Gupta P, Chedraui P, et al. The International Menopause Study of Climate, Altitude, Temperature (IMS-CAT) and vasomotor symptoms. *Climacteric*. 2013;16(1):8-16. doi:10.3109/13697137.2012.699563
256. Anderson D, Yoshizawa T, Gollschewski S, Atogami F, Courtney M. Menopause in Australia and Japan: effects of country of residence on menopausal status and menopausal symptoms. *Climacteric*. 2004;7(2):165-174. doi:10.1080/13697130410001713760
257. Gold EB, Colvin A, Avis N, et al. Longitudinal analysis of the association between vasomotor symptoms and race/ethnicity across the menopausal transition: study of women's health across the nation. *Am J Public Health*. 2006;96(7):1226-1235. doi:10.2105/AJPH.2005.066936
258. Afshari P, Manochehri S, Tadayon M. Prevalence of Depression in Postmenopausal Women. *Jundishapur Journal of Chronic Disease Care*. 2015,4. doi:10.5812/jjcdc.27521v2.
259. Gonçalves B, Fagulha T, Ferreira A. A population-based assessment of the relationship between menopausal and depressive symptoms in Portuguese women. *Health Care Women Int*. 2013;34(1):86-100. doi:10.1080/07399332.2012.721413
260. Onya, O. and Otorkpa, C. Prevalence and Socio-Demographic Determinants of Depression in Women: A Comparison between Pre-Menopausal and Post-Menopausal Attendees of the General Outpatient Department in Fmc Lokoja. *Open Journal of Depression*,2018;7:51-59. doi:

10.4236/ojd.2018.73004.

261. Yen JY, Yang MS, Wang MH, Lai CY, Fang MS. The associations between menopausal syndrome and depression during pre-, peri-, and postmenopausal period among Taiwanese female aborigines. *Psychiatry Clin Neurosci.* 2009;63(5):678-684. doi:10.1111/j.1440-1819.2009.02001.x
262. Timur S, Sahin NH. The prevalence of depression symptoms and influencing factors among perimenopausal and postmenopausal women. *Menopause.* 2010;17(3):545-551. doi:10.1097/gme.0b013e3181cf8997
263. Zang H, He L, Chen Y, Ge J, Yao Y. The association of depression status with menopause symptoms among rural midlife women in China. *Afr Health Sci.* 2016;16(1):97-104. doi:10.4314/ahs.v16i1.13
264. Masjoudi M, Amjadi MA, Leyli EKN. Severity and Frequency of Menopausal Symptoms in Middle Aged Women, Rasht, Iran. *J Clin Diagn Res.* 2017;11(8):QC17-QC21. doi:10.7860/JCDR/2017/26994.10515
265. Kapoor E, Okuno M, Miller VM, et al. Association of adverse childhood experiences with menopausal symptoms: Results from the Data Registry on Experiences of Aging, Menopause and Sexuality (DREAMS). *Maturitas.* 2021;143:209-215. doi:10.1016/j.maturitas.2020.10.006
266. Durairaj A, Venkateshvaran S. Determinants of Menopausal Symptoms and Attitude Towards Menopause Among Midlife Women: A Cross-Sectional Study in South India. *Cureus.* 2022;14(9):e28718. Published 2022 Sep 3. doi:10.7759/cureus.28718
267. Bala K, Gupta R, Gupta RK, Akhtar N. Knowledge and Perceptions Regarding Climacteric Among Rural Women in Jammu District of UT of J and K, India: A Cross-Sectional Study. *J Midlife Health.* 2022;13(2):163-168. doi:10.4103/jmh.jmh\_217\_21
268. Stefanopoulou E, Shah D, Shah R, Gupta P, Sturdee DW, Hunter MS. An International Menopause Society study of climate, altitude, temperature (IMS-CAT) and vasomotor symptoms in urban Indian regions. *Climacteric.* 2014;17(4):417-424. doi:10.3109/13697137.2013.852169
269. Abou-Raya S, Sadek S, AbelBaqy M, et al. Relationship between sociodemographic, reproductive, and lifestyle factors and the severity of menopausal symptoms among Egyptian women in Alexandria. *Menopause.* 2016;23(8):888-893. doi:10.1097/GME.0000000000000635
270. Krajewska-Ferishah K, Kułak-Bejda A, Szyszko-Perłowska A, Shpakou A, Van Damme-Ostapowicz K, Chatzopulu A. Risk of Depression during Menopause in Women from Poland, Belarus, Belgium, and Greece. *J Clin Med.* 2022;11(12):3371. Published 2022 Jun 12. doi:10.3390/jcm11123371
271. Ogwumike OO, Kaka B, Adegbemigun O, Abiona T. Health-related and socio-demographic correlates of physical activity level amongst urban menopausal women in Nigeria. *Maturitas.* 2012;73(4):349-353. doi:10.1016/j.maturitas.2012.09.010
272. Ornat L, Martínez-Dearth R, Muñoz A, et al. Sexual function, satisfaction with life and menopausal symptoms in middle-aged women. *Maturitas.* 2013;75(3):261-269. doi:10.1016/j.maturitas.2013.04.007
273. Wang HL, Booth-LaForce C, Tang SM, Wu WR, Chen CH. Depressive symptoms in Taiwanese women during the peri- and post-menopause years: associations with demographic, health, and psychosocial characteristics. *Maturitas.* 2013;75(4):355-360.



doi:10.1016/j.maturitas.2013.04.021

274. Gao HL, Lin SQ, Wei Y, Chen Y, Wu ZL. The effect of age and menopausal status on musculoskeletal symptoms in Chinese women aged 35-64 years. *Climacteric*. 2013;16(6):639-645. doi:10.3109/13697137.2013.769095
275. Sierra B, Hidalgo LA, Chedraui PA. Measuring climacteric symptoms in an Ecuadorian population with the Greene Climacteric Scale. *Maturitas*. 2005;51(3):236-245. doi:10.1016/j.maturitas.2004.08.003
276. Castelo-Branco C, Palacios S, Mostajo D, Tobar C, von Helde S. Menopausal transition in Movima women, a Bolivian Native-American. *Maturitas*. 2005;51(4):380-385. doi:10.1016/j.maturitas.2004.09.004
277. Ahn S, Song R. Bone mineral density and perceived menopausal symptoms: factors influencing low back pain in postmenopausal women. *J Adv Nurs*. 2009;65(6):1228-1236. doi:10.1111/j.1365-2648.2009.04983.x
278. Jin F, Tao M, Teng Y, Shao H, Li C, Mills E. Knowledge and attitude towards menopause and hormone replacement therapy in Chinese women. *Gynecol Obstet Invest*. 2015;79(1):40-45. doi:10.1159/000365172
279. Pérez-López FR, Fernández-Alonso AM, Pérez-Roncero G, Chedraui P, Monterrosa-Castro A, Llana P. Assessment of menopause-related symptoms in mid-aged women with the 10-item Cervantes Scale. *Maturitas*. 2013;76(2):151-154. doi:10.1016/j.maturitas.2013.07.002
280. Huang Z, Shi J, Liu W, Wei S, Zhang Z. The influence of educational level in peri-menopause syndrome and quality of life among Chinese women. *Gynecol Endocrinol*. 2020;36(11):991-996. doi:10.1080/09513590.2020.1781081
281. Dasgupta D, Ray S. Attitude toward menopause and aging: a study on postmenopausal women of West Bengal. *J Women Aging*. 2013;25(1):66-79. doi:10.1080/08952841.2012.720203
282. Huseth-Zosel A, Strand M, Perry J. Socioeconomic differences in the menopausal experience of Chinese women. *Post Reprod Health*. 2014;20(3):98-103. doi:10.1177/2053369114544729
283. Ornat L, Martínez-Deearth R, Chedraui P, Pérez-López FR. Assessment of subjective sleep disturbance and related factors during female mid-life with the Jenkins Sleep Scale. *Maturitas*. 2014;77(4):344-350. doi:10.1016/j.maturitas.2014.01.005
284. Legorreta D, Montañó JA, Hernández I, Salinas C, Hernández-Bueno JA; AMEC Research Committee. Age at menopause, motives for consultation and symptoms reported by 40-59-year-old Mexican women. *Climacteric*. 2013;16(4):417-425. doi:10.3109/13697137.2012.696288
285. Aydin Y, Hassa H, Oge T, Yalcin OT, Mutlu FS. Frequency and determinants of urogenital symptoms in postmenopausal Islamic women. *Menopause*. 2014;21(2):182-187. doi:10.1097/GME.0b013e3182937966
286. Zhang L, Ruan X, Cui Y, Gu M, Mueck AO. Menopausal Symptoms and Associated Social and Environmental Factors in Midlife Chinese Women. *Clin Interv Aging*. 2020;15:2195-2208. Published 2020 Nov 16. doi:10.2147/CIA.S278976
287. Wu S, Shi Y, Zhao Q, Men K. The relationship between physical activity and the severity of menopausal symptoms: a cross-sectional study. *BMC Womens Health*. 2023;23(1):212. Published 2023 Apr 28. doi:10.1186/s12905-023-02347-7
288. Shea AK, Sohail N, Gilsing A, Mayhew AJ, Griffith LE, Raina P. Depression, hormone therapy, and the menopausal transition among women aged 45 to 64 years using Canadian Longitudinal

- Study on aging baseline data. *Menopause*. 2020;27(7):763-770. doi:10.1097/GME.0000000000001540
289. Abdullah B, Moize B, Ismail BA, Zamri M, Mohd Nasir NF. Prevalence of menopausal symptoms, its effect to quality of life among Malaysian women and their treatment seeking behaviour. *Med J Malaysia*. 2017;72(2):94-99.
290. Chu K, Shui J, Ma L, et al. Biopsychosocial risk factors of depression during menopause transition in southeast China. *BMC Womens Health*. 2022;22(1):273. Published 2022 Jul 5. doi:10.1186/s12905-022-01710-4
291. Barghandan N, Dolatkah N, Eslamian F, Ghafarifar N, Hashemian M. Association of depression, anxiety and menopausal-related symptoms with demographic, anthropometric and body composition indices in healthy postmenopausal women. *BMC Womens Health*. 2021;21(1):192. Published 2021 May 7. doi:10.1186/s12905-021-01338-w
292. Hickey M, Riach K, Kachouie R, Jack G. No sweat: managing menopausal symptoms at work. *J Psychosom Obstet Gynaecol*. 2017;38(3):202-209. doi:10.1080/0167482X.2017.1327520
293. Blell MT. Menopausal symptoms among British Pakistani women: a critique of the standard checklist approach. *Menopause*. 2015;22(1):79-87. doi:10.1097/GME.0000000000000256
294. Dienye PO, Judah F, Ndukwu G. Frequency of symptoms and health seeking behaviours of menopausal women in an out-patient clinic in Port Harcourt, Nigeria. *Glob J Health Sci*. 2013;5(4):39-47. Published 2013 Mar 18. doi:10.5539/gjhs.v5n4p39
295. Whiteley J, DiBonaventura Md, Wagner JS, Alvir J, Shah S. The impact of menopausal symptoms on quality of life, productivity, and economic outcomes. *J Womens Health (Larchmt)*. 2013;22(11):983-990. doi:10.1089/jwh.2012.3719
296. Bener A, Saleh NM, Bakir A, Bhugra D. Depression, Anxiety, and Stress Symptoms in Menopausal Arab Women: Shedding More Light on a Complex Relationship. *Ann Med Health Sci Res*. 2016;6(4):224-231. doi:10.4103/amhsr.amhsr\_341\_15
297. Olowokere AE, Tope-Ajayi TO, Komolafe AO, Olajubu AO. Lifestyle practices and menopause-related symptoms among women in rural communities of Ado-Ekiti local government area, Nigeria. *Post Reprod Health*. 2021;27(2):66-76. doi:10.1177/2053369120971427
298. Zhu Y, Yang X, Fan X, et al. Decreased Sexual Desire among Middle-Aged and Old Women in China and Factors Influencing It: A Questionnaire-Based Study. *Evid Based Complement Alternat Med*. 2021;2021:6649242. Published 2021 May 25. doi:10.1155/2021/6649242
299. Zhang Q, Li F, Yu Y, Yu X, Sheng Q, Zhang X. Differential factors associated with hot flashes in Chinese perimenopausal and postmenopausal women. *Maturitas*. 2009;63(1):94-98. doi:10.1016/j.maturitas.2009.02.007
300. Salazar-Pousada D, Monterrosa-Castro A, Ojeda E, et al. Evaluation of depressive symptoms in mid-aged women: report of a multicenter South American study. *Menopause*. 2017;24(11):1282-1288. doi:10.1097/GME.0000000000000924
301. Whiteman MK, Staropoli CA, Langenberg PW, McCarter RJ, Kjerulff KH, Flaws JA. Smoking, body mass, and hot flashes in midlife women. *Obstet Gynecol*. 2003;101(2):264-272. doi:10.1016/s0029-7844(02)02593-0
302. Ruan X, Cui Y, Du J, Jin F, Mueck AO. Prevalence of climacteric symptoms comparing perimenopausal and postmenopausal Chinese women. *J Psychosom Obstet Gynaecol*. 2017;38(3):161-169. doi:10.1080/0167482X.2016.1244181
303. An SY, Kim Y, Kwon R, et al. Depressive symptoms and suicidality by menopausal stages among

- middle-aged Korean women. *Epidemiol Psychiatr Sci.* 2022;31:e60. Published 2022 Aug 26. doi:10.1017/S2045796022000439
304. Devi G, Hahn K, Massimi S, Zhivotovskaya E. Prevalence of memory loss complaints and other symptoms associated with the menopause transition: a community survey. *Gend Med.* 2005;2(4):255-264. doi:10.1016/s1550-8579(05)80055-5
305. Li F, He F, Sun Q, et al. Reproductive history and risk of depressive symptoms in postmenopausal women: A cross-sectional study in eastern China. *J Affect Disord.* 2019;246:174-181. doi:10.1016/j.jad.2018.12.031
306. Xu J, Bartoces M, Neale AV, Dailey RK, Northrup J, Schwartz KL. Natural history of menopause symptoms in primary care patients: a MetroNet study. *J Am Board Fam Pract.* 2005;18(5):374-382. doi:10.3122/jabfm.18.5.374
307. Yilmaz S, Arslan I, Yengil Taci D. The effect of physical activity and depressive mood on menopausal symptoms in postmenopausal women. *Int J Clin Pract.* 2021;75(7):e14247. doi:10.1111/ijcp.14247
308. Islam RM, Bell RJ, Billah B, Hossain MB, Davis SR. Prevalence and severity of vasomotor symptoms and joint pain in women at midlife in Bangladesh: a population-based survey. *Menopause.* 2016;23(7):731-739. doi:10.1097/GME.0000000000000615
309. Shakhathreh FM, Mas'ad D. Menopausal symptoms and health problems of women aged 50-65 years in southern Jordan. *Climacteric.* 2006;9(4):305-311. doi:10.1080/13697130600861542
310. Obermeyer CM, Reher D, Saliba M. Symptoms, menopause status, and country differences: a comparative analysis from DAMES. *Menopause.* 2007;14(4):788-797. doi:10.1097/gme.0b013e318046eb4a
311. Al-Qutob R. Menopause-associated problems: types and magnitude. A study in the Ain Al-Basha area, Jordan. *J Adv Nurs.* 2001;33(5):613-620. doi:10.1046/j.1365-2648.2001.01706.x
312. Chae HD, Choi SY, Cho EJ, et al. Awareness and experience of menopausal symptom and hormone therapy in Korean postmenopausal women. *J Menopausal Med.* 2014;20(1):7-13. doi:10.6118/jmm.2014.20.1.7
313. McVeigh C. Perimenopause: more than hot flushes and night sweats for some Australian women. *J Obstet Gynecol Neonatal Nurs.* 2005;34(1):21-27. doi:10.1177/0884217504272801
314. Lampio L, Polo-Kantola P, Polo O, Kauko T, Aittokallio J, Saaresranta T. Sleep in midlife women: effects of menopause, vasomotor symptoms, and depressive symptoms. *Menopause.* 2014;21(11):1217-1224. doi:10.1097/GME.0000000000000239
315. Oppermann K, Fuchs SC, Donato G, Bastos CA, Spritzer PM. Physical, psychological, and menopause-related symptoms and minor psychiatric disorders in a community-based sample of Brazilian premenopausal, perimenopausal, and postmenopausal women. *Menopause.* 2012;19(3):355-360. doi:10.1097/gme.0b013e31822ba026
316. An J, Li L. Urban-rural differences in epidemiology and risk factors of menopause syndrome in middle-aged Chinese women. *Menopause.* 2023;30(3):306-316. doi:10.1097/GME.0000000000002135
317. Kamal NN, Seedhom AE. Quality of life among postmenopausal women in rural Minia, Egypt. *East Mediterr Health J.* 2017;23(8):527-533. Published 2017 Oct 30.
318. Rajbhandari S, Subedi RK, Dangal G, et al. Menopausal Health Status of Nepalese Women. *JNMA J Nepal Med Assoc.* 2017;56(205):107-111.

319. Cortés YI, Coslov N, Richardson MK, Woods NF. Symptom experience during the late reproductive stage versus the menopausal transition in the Spanish-language Women Living Better survey. *Menopause*. 2023;30(3):260-266. doi:10.1097/GME.0000000000002132
320. Baig LA, Karim SA. Age at menopause, and knowledge of and attitudes to menopause, of women in Karachi, Pakistan. *J Br Menopause Soc*. 2006;12(2):71-74. doi:10.1258/136218006777525721
321. Chalise GD, Shrestha S, Thapa S, Bharati M, Pradhan S, Adhikari B. Health Problems experienced by Peri-menopausal Women and their Perception towards Menopause. *J Nepal Health Res Counc*. 2022;20(1):102-107. Published 2022 Jun 2. doi:10.33314/jnhrc.v20i01.3891
